# Supplementary material for: Resolving the phylogenetic position of Darwin's extinct ground sloth (Mylodon darwinii) using mitogenomic and nuclear exon data
Source: PubMed Central journal article supplement (PMC5966596; doi:10.1098/rspb.2018.0214), 2018-05-16
Supplement: rspb20180214supp1.pdf [file rspb20180214supp1.pdf]

# Resolving the phylogenetic position of Darwin's extinct ground sloth (*Mylodon darwini*) using mitogenomic and nuclear exon data

Frédéric Delsuc, Melanie Kuch, Gillian C. Gibb, Jonathan Hughes, Paul Szpak, John Southon, Jacob Enk, Ana T. Duggan' and Hendrik N. Poinar

## Supplementary Material

**Table S1:** Taxon sampling and sequence accession numbers.

**Table S2:** Detailed results of the PartitionFinder analysis for the mitogenomic dataset.

**Table S3:** Detailed results of the PartitionFinder analysis for the nuclear dataset.

**Table S4:** Detailed comparisons between our *Mylodon* mitogenome and the one produced by Slater et al. (2016).

**Figure S1:** mapDamage DNA fragmentation and nucleotide mis-incorporation plots.

**Figure S2:** mapDamage DNA fragment length distributions.

**Figure S3:** Bayesian mitogenomic tree under the CAT-GTR+G<sub>4</sub> mixture model (PhyloBayes).

**Figure S4:** Bayesian mitogenomic tree under a mixed model (MrBayes).

**Figure S5:** Maximum likelihood mitogenomic tree under a GTR+G+I mixed model (RAxML).

**Figure S6:** Bayesian nuclear tree under the CAT-GTR+G<sub>4</sub> mixture model (PhyloBayes).

**Figure S7:** Bayesian nuclear tree under a mixed model (MrBayes).

**Figure S8:** Maximum likelihood nuclear tree under a GTR+G mixed model (RAxML).

**Figure S9:** Bayesian mitogenomic chronogram under the CAT-GTR+G<sub>4</sub> mixture model and an autocorrelated lognormal model of clock relaxation (PhyloBayes).

**Figure S10:** Bayesian nuclear chronogram under the CAT-GTR+G<sub>4</sub> mixture model and an autocorrelated lognormal model of clock relaxation (PhyloBayes).

**Figure S11:** Comparison of the two *Mylodon* mitogenomes aligned with the *Choloepus didactylus* reference mitogenome.

**Figure S12:** Maximum likelihood tree of sloth mitogenomes under a single GTR+G model (RAxML).

**Table S1.** Detailed taxonomic sampling and corresponding sequence accession numbers of the mitochondrial and nuclear datasets. Newly acquired sequences from this study are indicated in bold.

| <b>Species</b>                  | <b>Common name</b>              | <b>Mitogenomes</b> | <b>ADORA3</b>   | <b>APOB</b>     | <b>BCHE</b>     | <b>BRCA1</b>    | <b>BRCA2</b>    | <b>RAG2</b>     | <b>TTN</b>      |
|---------------------------------|---------------------------------|--------------------|-----------------|-----------------|-----------------|-----------------|-----------------|-----------------|-----------------|
| <i>*Bradypus pygmaeus</i>       | Pygmy sloth                     | KT818523           | <b>LT852562</b> | <b>LT852583</b> | <b>LT852604</b> | <b>LT852627</b> | <b>LT852645</b> | <b>LT852662</b> | <b>LT852684</b> |
| <i>*Bradypus torquatus</i>      | Maned sloth                     | KT818524           | <b>LT852563</b> | <b>LT852584</b> | <b>LT852605</b> | <b>LT852628</b> | <b>LT852646</b> | <b>LT852663</b> | <b>LT852685</b> |
| <i>*Bradypus tridactylus</i>    | Pale-throated three-toed sloth  | KT818525           | <b>LT852564</b> | <b>LT852585</b> | <b>LT852606</b> | <b>LT852629</b> | <b>LT852647</b> | <b>LT852664</b> | <b>LT852686</b> |
|                                 | Brown-throated three-toed sloth | NC_006923          | <b>LT852565</b> | <b>LT852586</b> | <b>LT852607</b> | <b>LT852630</b> | <b>LT852648</b> | <b>LT852665</b> | <b>LT852687</b> |
| <i>*Bradypus variegatus</i>     | Southern two-toed sloth         | NC_006924          | <b>LT852570</b> | <b>LT852591</b> | <b>LT852613</b> | <b>LT852634</b> | <b>LT852651</b> | <b>LT852671</b> | <b>LT852693</b> |
| <i>*Choloepus didactylus</i>    | Hoffmann's two-toed sloth       | KT818538           | <b>LT852571</b> | <b>LT852592</b> | <b>LT852614</b> | <b>LT852635</b> | <b>LT852652</b> | <b>LT852672</b> | <b>LT852694</b> |
| <i>*Choloepus hoffmanni</i>     | Darwin's ground sloth           | <b>MF061314</b>    | <b>LT852575</b> | <b>LT852596</b> | <b>LT852619</b> | <b>LT852639</b> | <b>LT852656</b> | <b>LT852676</b> | <b>LT852698</b> |
| <i>*Mylodon darwini</i>         | Pygmy anteater                  | KT818539           | <b>LT852572</b> | <b>LT852593</b> | <b>LT852615</b> | <b>LT852636</b> | <b>LT852653</b> | <b>LT852673</b> | <b>LT852695</b> |
| <i>*Cyclopes didactylus</i>     | Giant anteater                  | KT818549           | <b>LT852576</b> | <b>LT852597</b> | <b>LT852620</b> | <b>LT852640</b> | <b>LT852657</b> | <b>LT852677</b> | <b>LT852699</b> |
| <i>*Myrmecophaga tridactyla</i> |                                 |                    |                 |                 |                 |                 |                 |                 |                 |
| <i>*Tamandua mexicana</i>       | Northern tamandua               | KT818551           | <b>LT852578</b> | <b>LT852599</b> | <b>LT852622</b> | <b>LT852641</b> | <b>LT852659</b> | <b>LT852679</b> | <b>LT852701</b> |
| <i>*Tamandua tetradactyla</i>   | Southern tamandua               | NC_004032          | <b>LT852579</b> | <b>LT852600</b> | <b>LT852623</b> | <b>LT852642</b> | <b>LT852660</b> | <b>LT852680</b> | <b>LT852702</b> |
| <i>*Dasypus kappleri</i>        | Greater long-nosed armadillo    | KT818541           | <b>LT852574</b> | <b>LT852595</b> | <b>LT852617</b> | <b>LT852638</b> | <b>LT852655</b> | <b>LT852675</b> | <b>LT852697</b> |
| <i>*Dasypus hybridus</i>        | Southern long-nosed armadillo   | KT818540           | <b>LT852573</b> | <b>LT852594</b> | <b>LT852616</b> | <b>LT852637</b> | <b>LT852654</b> | <b>LT852674</b> | <b>LT852696</b> |
| <i>Dasypus septemcinctus</i>    | Seven-banded armadillo          | KT818546           | -               | -               | -               | -               | -               | -               | -               |
| <i>Dasypus novemcinctus</i>     | Nine-banded armadillo           | NC_001821          | XM_004473       | JN413957        | XM_0125197      | AF484222        | XM_012519       | XM_004483       | XM_0125         |
| US                              | armadillo                       |                    | 603             |                 | 96              |                 | 803             | 174             | 18926           |
| <i>Dasypus novemcinctus</i>     | Nine-banded armadillo           | KT818542           | -               | -               | -               | -               | -               | -               | -               |
| FG                              | armadillo                       |                    |                 |                 |                 |                 |                 |                 |                 |
| <i>Dasypus pilosus</i>          | Hairy long-nosed armadillo      | KT818544           | -               | -               | -               | -               | -               | -               | -               |

|                                    |                                  |           |                 |                 |                        |                 |                 |                 |                     |
|------------------------------------|----------------------------------|-----------|-----------------|-----------------|------------------------|-----------------|-----------------|-----------------|---------------------|
| <i>Dasybus sabanicola</i>          | Northern long-nosed armadillo    | KT818545  | -               | -               | -                      | -               | -               | -               | -                   |
| <i>Dasybus yepesi</i>              | Yunga's long-nosed armadillo     | KT818547  | -               | -               | -                      | -               | -               | -               | -                   |
| * <i>Chaetophractus vellerosus</i> | Screaming hairy armadillo        | KT818533  | <b>LT852568</b> | <b>LT852589</b> | <b>LT852611</b>        | <b>LT852632</b> | NA              | <b>LT852669</b> | <b>LT852691</b>     |
| * <i>Chaetophractus villosus</i>   | Large hairy armadillo            | KT818535  | <b>LT852569</b> | <b>LT852590</b> | <b>LT852612</b>        | <b>LT852633</b> | NA              | <b>LT852670</b> | <b>LT852692</b>     |
| * <i>Euphractus sexcinctus</i>     | Six-banded armadillo             | KT818548  | AY011193        | NA              | <b>LT852618</b>        | AF484224        | NA              | AY011922        | NA                  |
| * <i>Zaedyus pichiy</i>            | Pichi                            | KT818555  | <b>LT852582</b> | <b>LT852603</b> | <b>LT852626</b>        | <b>LT852644</b> | NA              | <b>LT852683</b> | <b>LT852705</b>     |
| * <i>Calyptophractus retusus</i>   | Greater fairy armadillo          | KT818532  | <b>LT852567</b> | <b>LT852588</b> | <b>LT852610</b>        | FR821709        | <b>LT852650</b> | <b>LT852668</b> | <b>LT852690</b>     |
| <i>Chlamyphorus truncatus</i>      | Pink fairy armadillo             | KT818536  | -               | -               | -                      | FR821708        | -               | -               | -                   |
| * <i>Priodontes maximus</i>        | Giant armadillo                  | KT818550  | <b>LT852577</b> | <b>LT852598</b> | <b>LT852621</b>        | AF484225        | <b>LT852658</b> | <b>LT852678</b> | <b>LT852700</b>     |
| * <i>Tolypeutes matacus</i>        | Southern three-banded armadillo  | KT818553  | <b>LT852580</b> | <b>LT852601</b> | <b>LT852624</b>        | AF484227        | <b>LT852661</b> | <b>LT852681</b> | <b>LT852703</b>     |
| * <i>Tolypeutes tricinctus</i>     | Brazilian three-banded armadillo | KT818554  | <b>LT852581</b> | <b>LT852602</b> | <b>LT852625</b>        | <b>LT852643</b> | NA              | <b>LT852682</b> | <b>LT852704</b>     |
| * <i>Cabassous chacoensis</i>      | Chacoan naked-tailed armadillo   | KT818528  | NA              | NA              | <b>LT852608</b>        | <b>LT852631</b> | NA              | <b>LT852666</b> | <b>LT852688</b>     |
| * <i>Cabassous unicinctus</i>      | Southern naked-tailed armadillo  | KT818531  | <b>LT852566</b> | <b>LT852587</b> | <b>LT852609</b>        | AF484228        | <b>LT852649</b> | <b>LT852667</b> | <b>LT852689</b>     |
| <i>Cabassous centralis</i>         | Northern naked-tailed armadillo  | KT818527  | -               | -               | -                      | -               | -               | -               | -                   |
| <i>Cabassous tatouay</i>           | Greater naked-tailed armadillo   | KT818529  | -               | -               | -                      | -               | -               | -               | -                   |
| <i>Dugong dugon</i>                | Dugong                           | NC_003314 | JN633415        | KR827337        | KR827307<br>XM_0105960 | AF284019        | JN414242        | JN633302        | JN632896<br>XM_0105 |
| <i>Loxodonta africana</i>          | African elephant                 | NC_000934 | AY011204        | JN413956        | 53<br>XM_0079487       | AF284021        | JN414245        | AY011932        | 86379               |
| <i>Orycteropus afer</i>            | Aardvark                         | NC_002078 | AY011206        | JN413950        | 19                     | AF284030        | JN414239        | AY011935        | JN632894            |

Notes -- \*: Libraries selected for nuclear capture; NA: Not available because capture failed to provide enough coverage.

**Table S2:** Detailed results of the PartitionFinder analysis for the mitogenomic dataset.

| Subset | Best Model | Subset Partitions                                                                                                                       |
|--------|------------|-----------------------------------------------------------------------------------------------------------------------------------------|
| 1      | GTR+I+G    | ATP6_p1, ATP8_p1, ATP8_p2, ATP8_p3, CYTB_p1, ND1_p1, ND2_p1, ND3_p1, ND4L_p1, ND4_p1, ND5_p1, ND6_p2, ND6_p3, rRNA_12S, rRNA_16S, tRNAs |
| 2      | GTR+I+G    | ATP6_p2, COX1_p1, COX1_p2, COX2_p1, COX2_p2, COX3_p1, COX3_p2, CYTB_p2, ND1_p2, ND2_p2, ND3_p2, ND4L_p2, ND4_p2, ND5_p2                 |
| 3      | GTR+I+G    | ATP6_p3, COX1_p3, COX2_p3, COX3_p3, CYTB_p3, ND1_p3, ND2_p3, ND3_p3, ND4L_p3, ND4_p3, ND5_p3, ND6_p1                                    |

### Settings used

alignment : ./mylo\_35mitos\_concat\_seqCat.phylip  
branchlengths : unlinked  
models : GTR+I+G, GTR+G  
model\_selection : bic  
search : greedy

### Best partitioning scheme

Scheme Name : step\_39  
Scheme lnL : -169349.5486  
Scheme BIC : 340923.742014  
Number of params : 231  
Number of sites : 15222  
Number of subsets : 3

### RaxML-style partition definitions

DNA, p1 = 1-681\3, 682-876\3, 683-876\3, 684-876\3, 3883-5022\3, 5023-5976\3, 5977-7020\3, 7021-7365\3, 7366-7662\3, 7663-9039\3, 9040-10842\3, 10844-11367\3, 10845-11367\3, 11368-12305, 12306-13766, 13767-15222

DNA, p2 = 2-681\3, 877-2415\3, 878-2415\3, 2416-3099\3, 2417-3099\3, 3100-3882\3, 3101-3882\3, 3884-5022\3, 5024-5976\3, 5978-7020\3, 7022-7365\3, 7367-7662\3, 7664-9039\3, 9041-10842\3

DNA, p3 = 3-681\3, 879-2415\3, 2418-3099\3, 3102-3882\3, 3885-5022\3, 5025-5976\3, 5979-7020\3, 7023-7365\3, 7368-7662\3, 7665-9039\3, 9042-10842\3, 10843-11367\3

**Table S3:** Detailed results of the PartitionFinder analysis for the seven nuclear exons dataset.

| Subset | Best Model | Subset Partitions                   |
|--------|------------|-------------------------------------|
| 1      | GTR+G      | ADORA3_pos1, ADORA3_pos2, APOB_pos2 |
| 2      | GTR+G      | ADORA3_pos3, APOB_pos3, RAG2_pos3   |
| 3      | GTR+G      | APOB_pos1, BRCA1_pos1               |
| 4      | GTR+G      | BCHE_pos1, RAG2_pos1, TTN_pos1      |
| 5      | GTR+I+G    | BCHE_pos2, RAG2_pos2, TTN_pos2      |
| 6      | GTR+G      | BCHE_pos3, BRCA2_pos3               |
| 7      | GTR+G      | BRCA1_pos2, BRCA2_pos2              |
| 8      | GTR+G      | BRCA1_pos3, TTN_pos3                |
| 9      | GTR+G      | BRCA2_pos1                          |

#### Settings used

alignment : ./Mylo\_7exons\_seqCat.phy  
branchlengths : linked  
models : GTR+I+G, GTR+G  
model\_selection : bic  
search : greedy

#### Best partitioning scheme

Scheme Name : step\_12  
Scheme lnL : -61830.71542  
Scheme BIC : 125038.535538  
Number of params : 143  
Number of sites : 15216  
Number of subsets : 9

#### RaxML-style partition definitions

DNA, p1 = 1-312\3, 2-312\3, 314-2724\3  
DNA, p2 = 3-312\3, 315-2724\3, 10374-10797\3  
DNA, p3 = 313-2724\3, 3706-6483\3  
DNA, p4 = 2725-3705\3, 10372-10797\3, 10798-15216\3  
DNA, p5 = 2726-3705\3, 10373-10797\3, 10799-15216\3  
DNA, p6 = 2727-3705\3, 6486-10371\3  
DNA, p7 = 3707-6483\3, 6485-10371\3  
DNA, p8 = 3708-6483\3, 10800-15216\3  
DNA, p9 = 6484-10371\3

**Table S4:** Detailed comparisons between our *Mylodon* mitogenome and the one produced by Slater et al. (2016).

| <b>Annotated regions</b>       | <b>Length (bp)</b> | <b>Identity (%)</b> | <b>Problems in Slater et al. (2016) sequence (KR336794)</b>                                                          |
|--------------------------------|--------------------|---------------------|----------------------------------------------------------------------------------------------------------------------|
| tRNA-Phe                       | 70                 | 100                 | None                                                                                                                 |
| 12S rRNA                       | 963                | 99.2                | 1 divergent region (12 bp) including a 4 bp insertion                                                                |
| tRNA-Val                       | 68                 | 100                 | None                                                                                                                 |
| 16S rRNA                       | 1575               | 98.7                | 1 substitution + 1 divergent region (26 bp ) + 3 Ns                                                                  |
| tRNA-Leu                       | 75                 | 100                 | None                                                                                                                 |
| ND1                            | 957                | 88.7                | 4 substitutions + 3 divergent regions (26 bp, 14bp, 19bp) including missing start codon + 60 Ns (7 stop codons)      |
| tRNA-Ile                       | 69                 | 100                 | None                                                                                                                 |
| tRNA-Gln                       | 73                 | 100                 | None                                                                                                                 |
| tRNA-Met                       | 69                 | 100                 | None                                                                                                                 |
| ND2                            | 1044               | 91.0                | 2 substitutions + 4 divergent regions (88 bp, 41 bp, 51 bp, 6 bp) + 3 deletions + 1 insertion + 4 Ns (8 stop codons) |
| tRNA-Trp                       | 69                 | 100                 | None                                                                                                                 |
| tRNA-Ala                       | 69                 | 100                 | None                                                                                                                 |
| tRNA-Asn                       | 73                 | 100                 | None                                                                                                                 |
| Origin of L-strand replication | 34                 | 100                 | None                                                                                                                 |
| tRNA-Cys                       | 67                 | 100                 | None                                                                                                                 |
| tRNA-Tyr                       | 66                 | 100                 | None                                                                                                                 |
| COX1                           | 1542               | 90.5                | 3 substitutions + 43 Ns                                                                                              |
| tRNA-Ser                       | 69                 | 100                 | None                                                                                                                 |
| tRNA-Asp                       | 68                 | 97.1                | 1 substitution + 1 insertion                                                                                         |
| COX2                           | 684                | 94.2                | 21 substitutions + 2 divergent regions (10 bp, 19 bp)                                                                |
| tRNA-Lys                       | 69                 | 100                 | None                                                                                                                 |
| ATP8                           | 204                | 52.5                | 3 substitutions + 94 gaps (1 stop codon)                                                                             |
| ATP6                           | 681                | 41.8                | 13 substitutions + 3 divergent regions (39 bp, 29 bp, 34 bp) + 175 Ns + 259 gaps (1 stop codon)                      |
| COX3                           | 784                | 96.4                | 2 substitutions + 1 divergent region (23 bp) + 1 insertion (10 stop codons)                                          |
| tRNA-Gly                       | 70                 | 100                 | None                                                                                                                 |
| ND3                            | 346                | 54.3                | 7 substitutions + 151 Ns                                                                                             |
| tRNA-Arg                       | 70                 | 100                 | None                                                                                                                 |
| ND4L                           | 297                | 59.1                | 1 divergent region (14 bp) + 110 Ns                                                                                  |
| ND4                            | 1378               | 85.7                | 187 Ns + 2 insertions (29 stop codons)                                                                               |
| tRNA-His                       | 69                 | 100                 | None                                                                                                                 |
| tRNA-Ser                       | 60                 | 100                 | None                                                                                                                 |

|                |      |      |                                                                                            |
|----------------|------|------|--------------------------------------------------------------------------------------------|
| tRNA-Leu       | 70   | 100  | None                                                                                       |
| ND5            | 1824 | 53.5 | 13 substitutions + 2 divergent regions (10 bp, 3 bp)<br>+ 809 gaps + 16 Ns (9 stop codons) |
| ND6            | 528  | 72.2 | 6 substitutions + 1 divergent region (13 bp) + 4<br>gaps + 126 Ns (2 stop codons)          |
| tRNA-Glu       | 69   | 100  | None                                                                                       |
| CYTB           | 1140 | 98.9 | 11 substitutions + 2 insertions (27 stop codons)                                           |
| tRNA-Thr       | 67   | 29.4 | 22 gaps + 26 Ns                                                                            |
| tRNA-Pro       | 70   | 0    | 70 Ns                                                                                      |
| Control Region | 993  | 60.0 | 48 gaps + 310 Ns                                                                           |

---

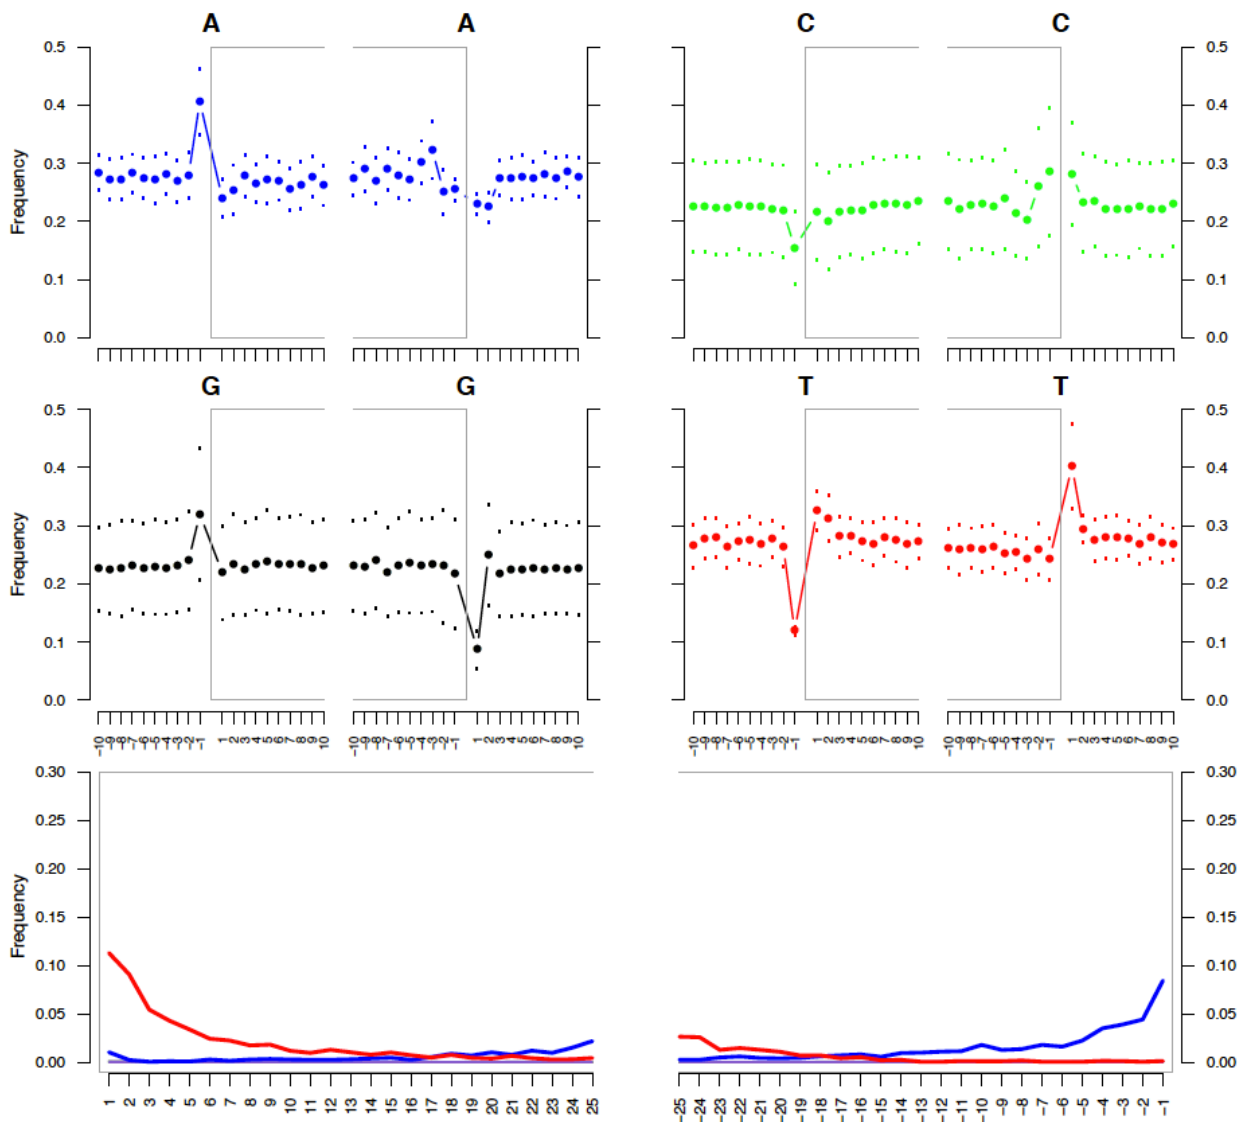

**Figure S1.** mapDamage DNA fragmentation and nucleotide mis-incorporation plots of the 53,550 cleaned shotgun Illumina reads mapping to the *Myiodon darwinii* SP57 mitogenome. 1st and 2nd rows: DNA fragmentation patterns for the 10 bp preceding read starts (positions -1 to -10 on the left panels of each base composition profile) and the 10 bp following read ends (positions 1 to 10 on the right panels of each base composition profile). 3rd row: Nucleotide mis-incorporation patterns for the first 25 nucleotides and the last 25 sequenced, respectively, with C=>T substitution frequencies (red) and G=>A substitution frequencies (blue).



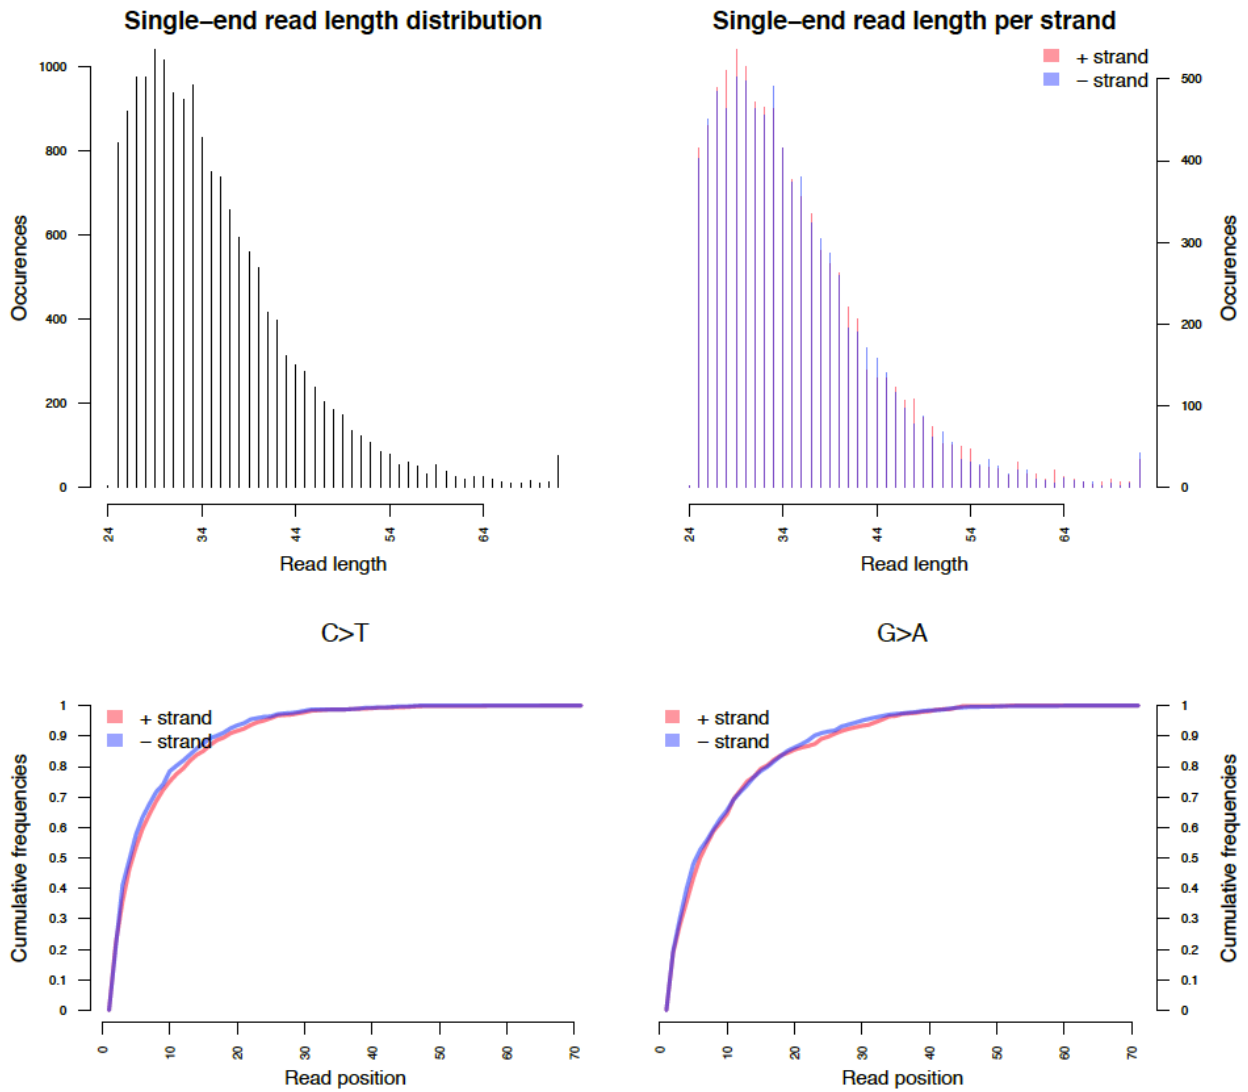

**Figure S2.** mapDamage fragment length distribution of the 53,550 shotgun cleaned Illumina reads mapping to the *Myiodon darwinii* SP57 mitogenome. Mean fragment length was 30 base pairs.



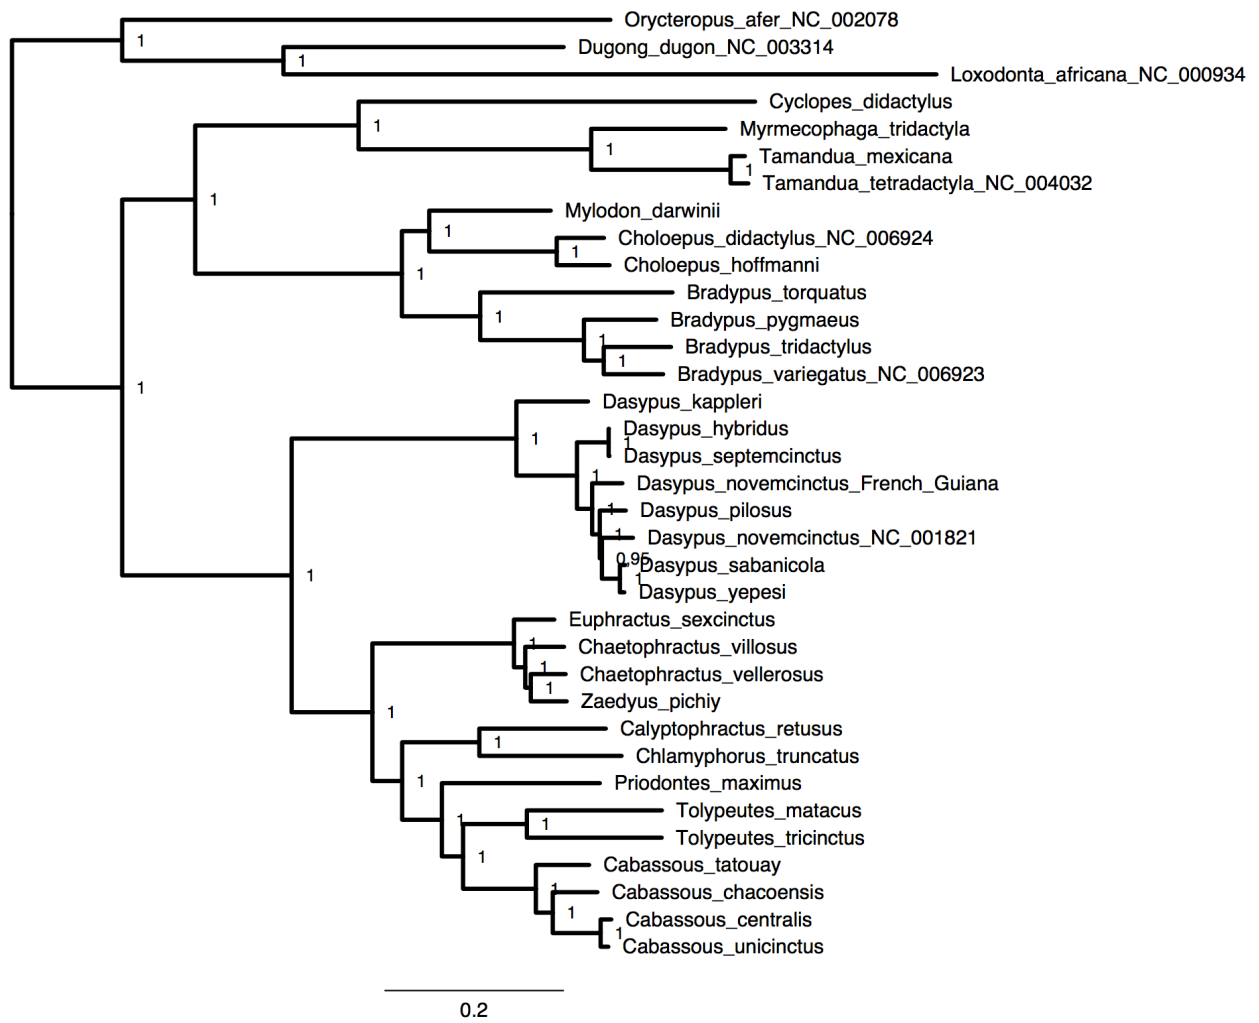

**Figure S4:** Bayesian consensus mitogenomic tree obtained with MrBayes under a mixed model for each best-fitting partition as estimated by PartitionFinder. Bayesian posterior probabilities are indicated at nodes. Branch lengths represent mean number of substitutions per site.

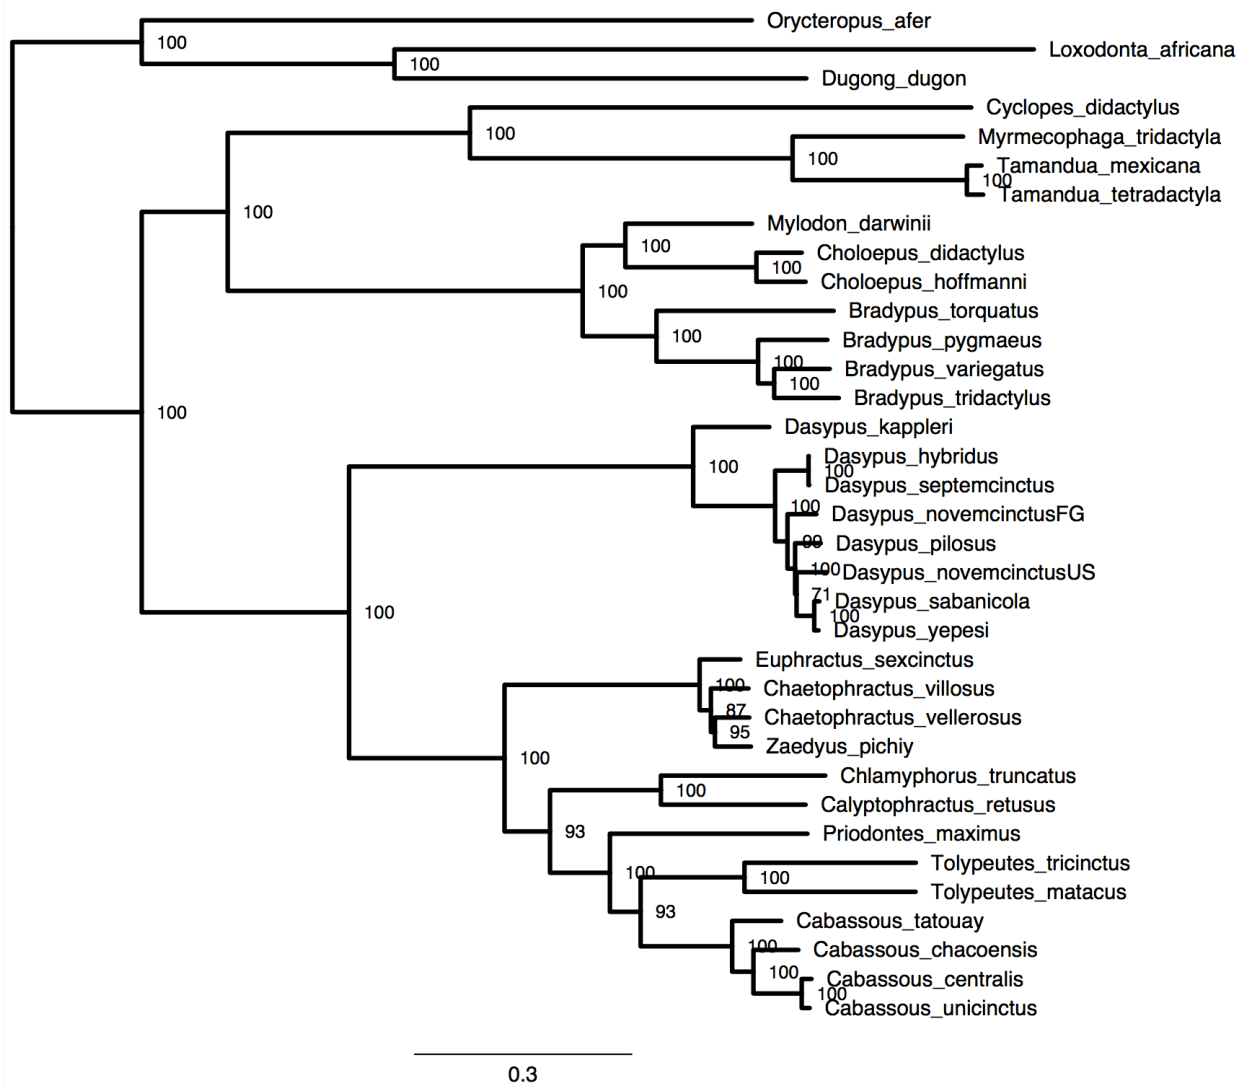

**Figure S5:** Maximum likelihood mitogenomic tree obtained with RAxML under a GTR+G+I mixed model for each best-fitting partition as estimated by PartitionFinder. Bootstrap percentages are indicated at nodes. Branch lengths represent mean number of substitutions per site.

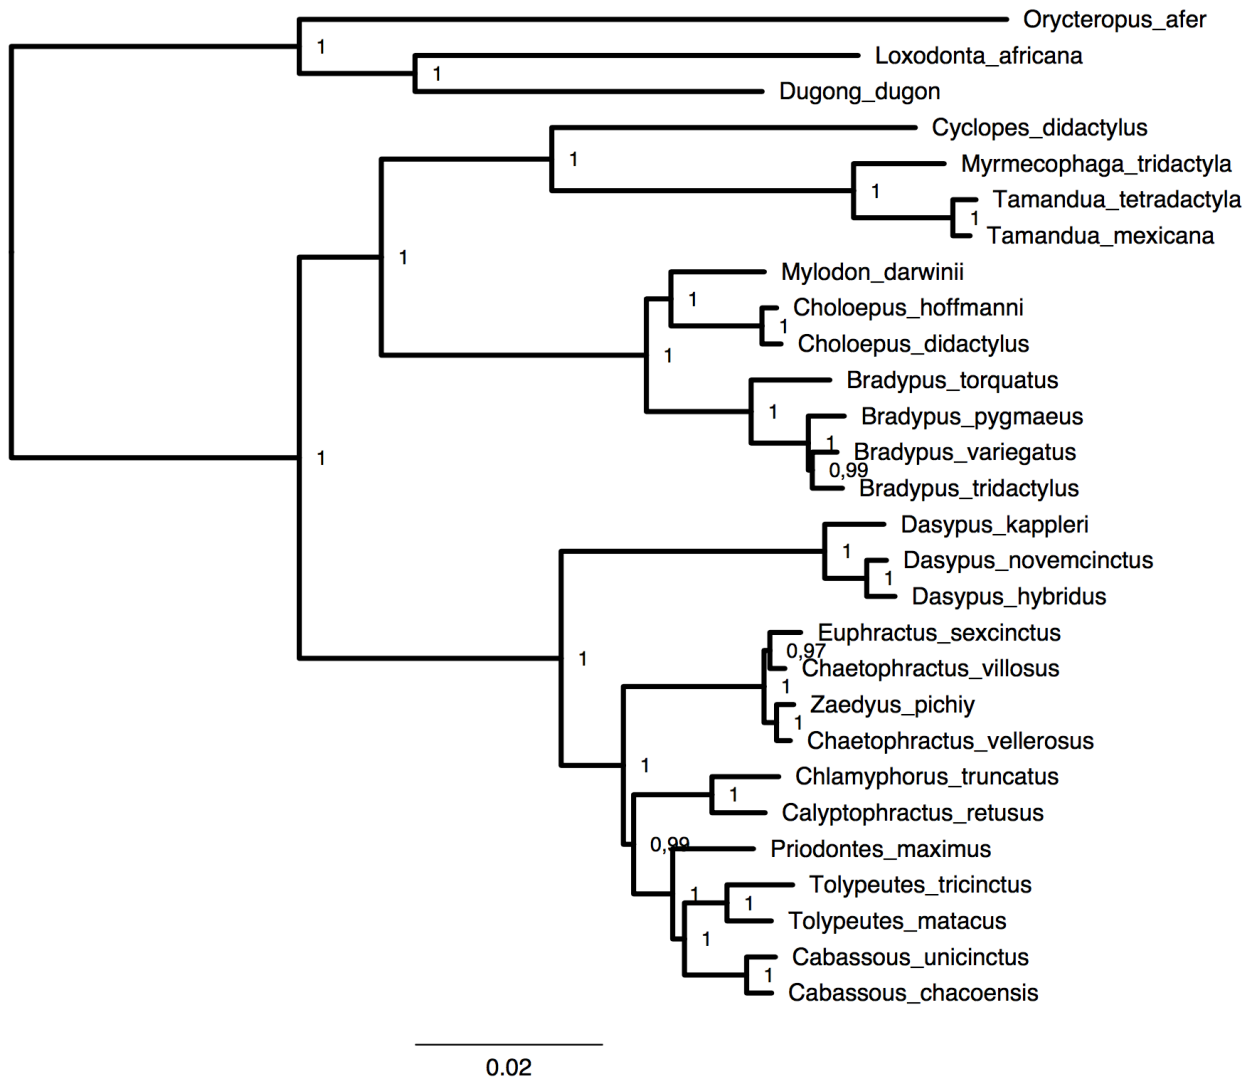

**Figure S6:** Bayesian consensus nuclear tree (concatenation of 7 exons) obtained with PhyloBayes under the CAT-GTR+G<sub>4</sub> mixture model. Bayesian posterior probabilities are indicated at nodes. Branch lengths represent mean number of substitutions per site.

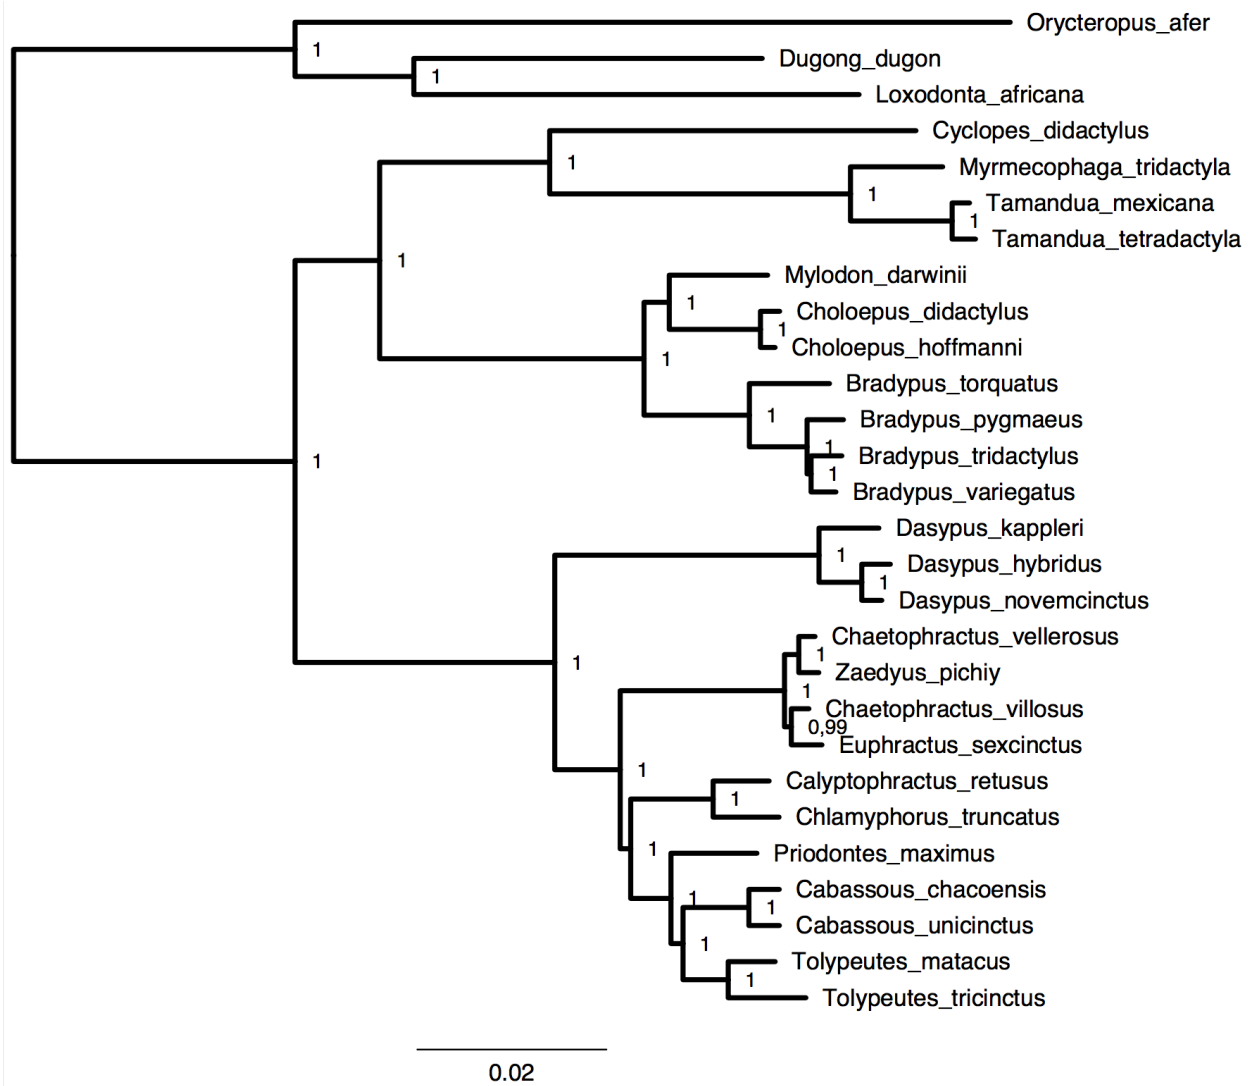

**Figure S7:** Bayesian consensus nuclear tree (concatenation of 7 exons) obtained with MrBayes under a mixed model for each best-fitting partition as estimated by PartitionFinder. Bayesian posterior probabilities are indicated at nodes. Branch lengths represent mean number of substitutions per site.

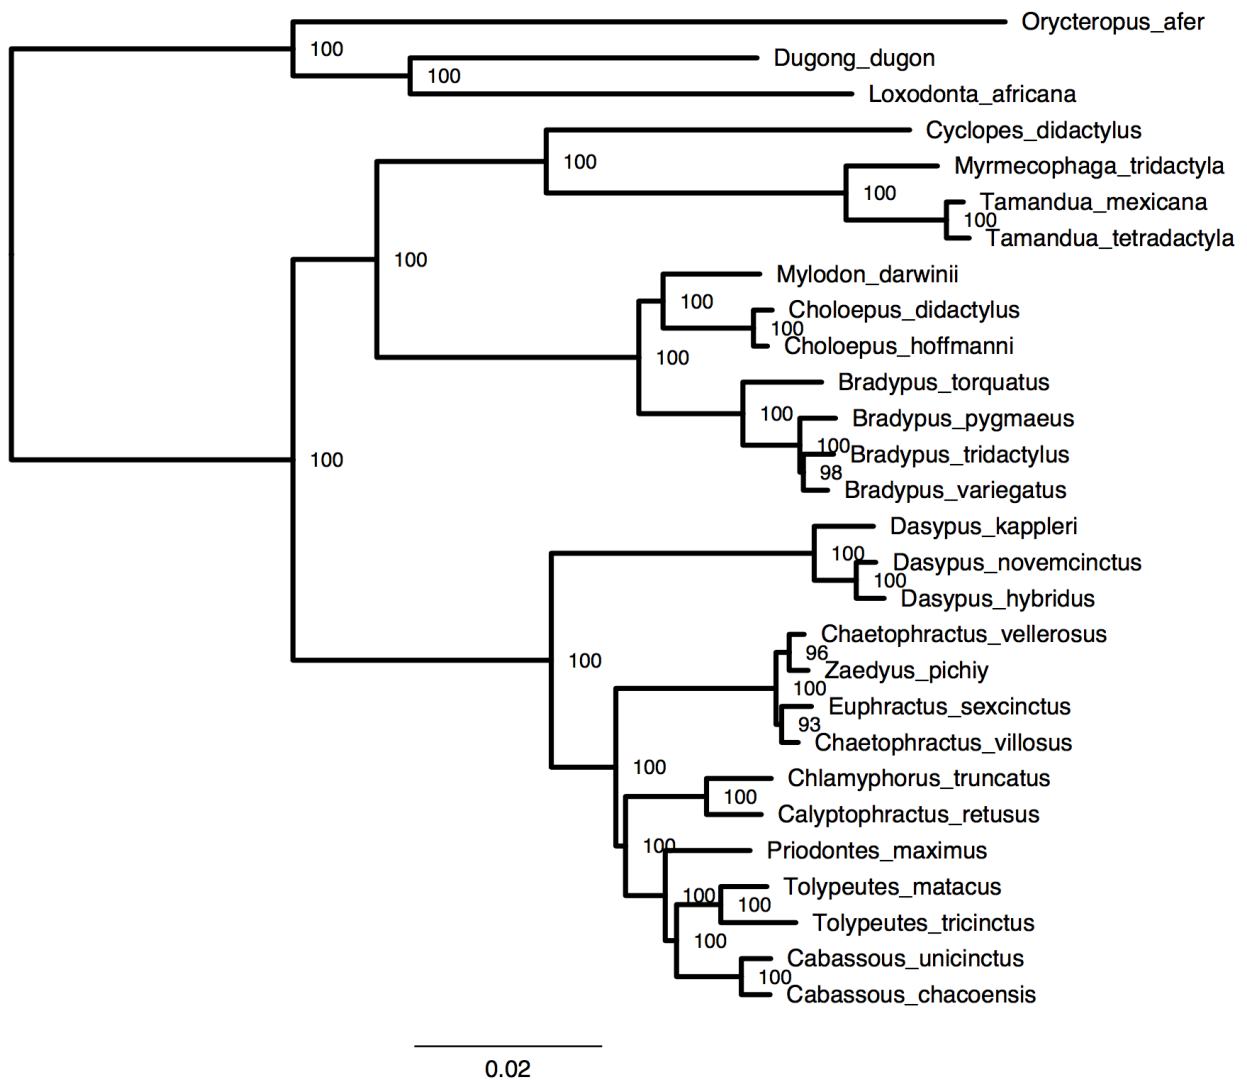

**Figure S8:** Maximum likelihood nuclear tree (concatenation of 7 exons) obtained with RAxML under a GTR+G mixed model for each best-fitting partition as estimated by PartitionFinder. Bootstrap percentages are indicated at nodes. Branch lengths represent mean number of substitutions per site.

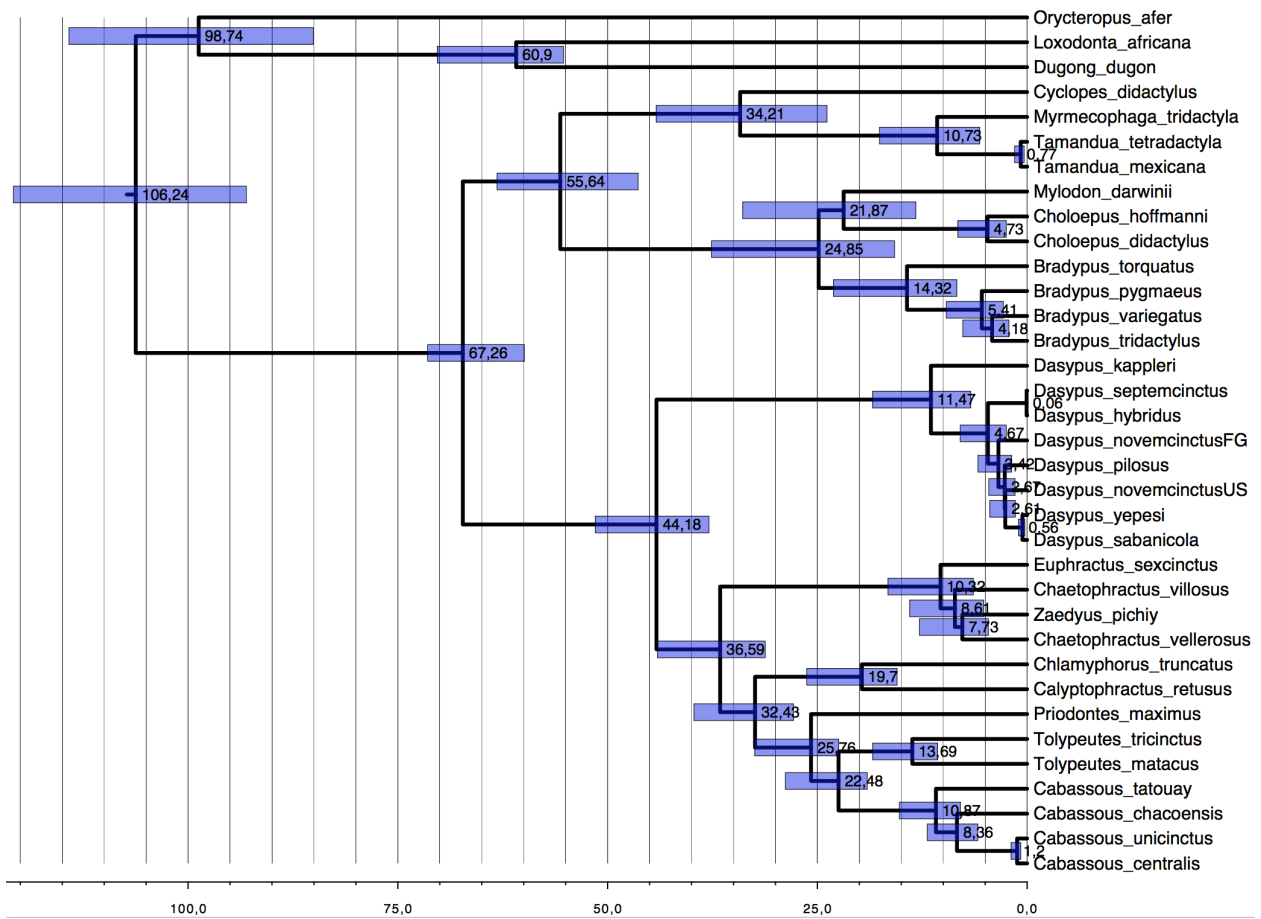

**Figure S9:** Bayesian mitogenomic chronogram obtained with PhyloBayes under the CAT-GTR+G<sub>4</sub> mixture model and an autocorrelated lognormal model of clock relaxation. Timescale is in million years ago.



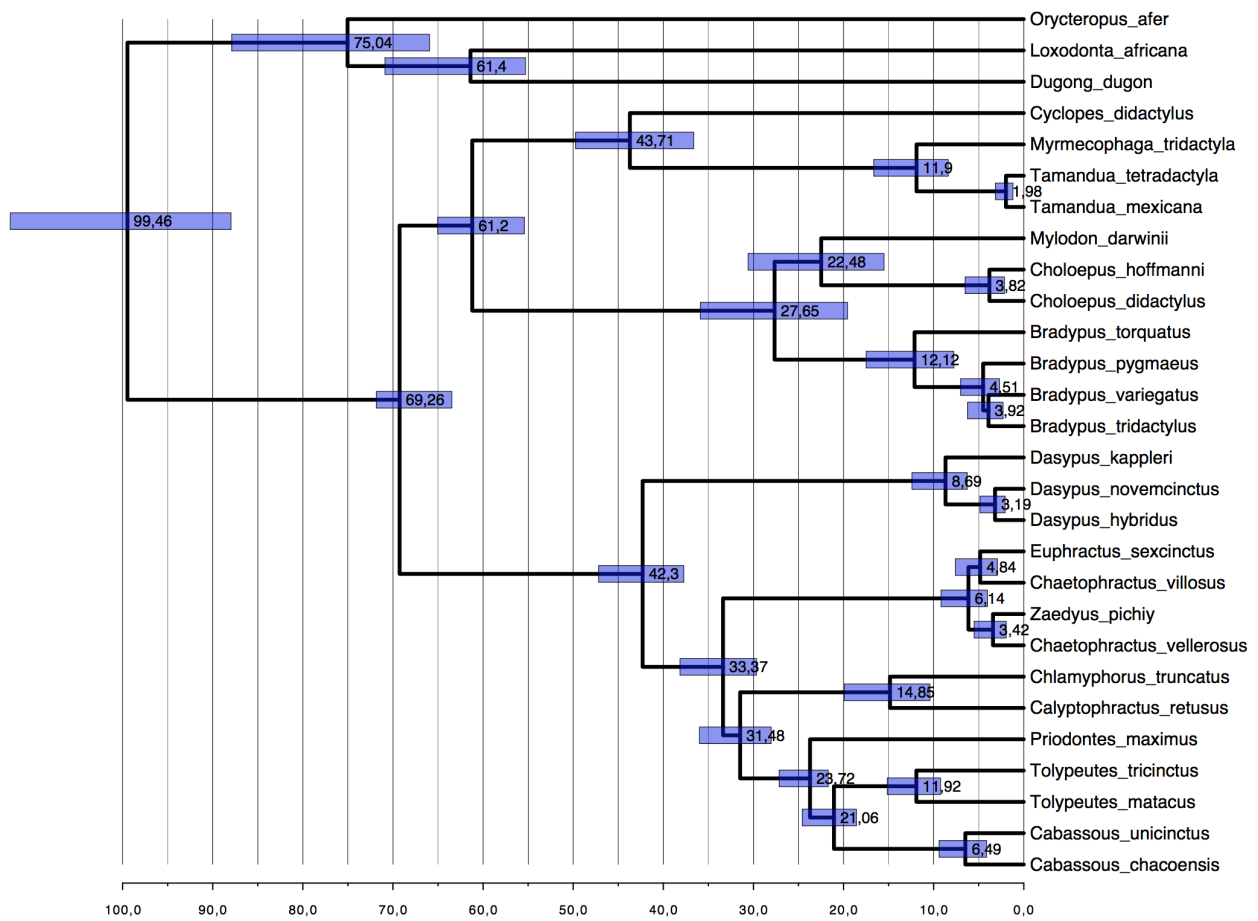

**Figure S10:** Bayesian nuclear chronogram (concatenation of 7 exons) obtained with PhyloBayes under the CAT-GTR+G<sub>4</sub> mixture model and an autocorrelated lognormal model of clock relaxation. Timescale is in million years ago.

**Figure S11:** Comparison of available *Mylodon* mitogenomes with the *Choloepus didactylus* reference mitogenome.

1 10 20 30 40 50 60 70 80 90 100 110 120 130

Consensus  
Translation

Identity

Choloepus\_didactylus\_NC  
Translation

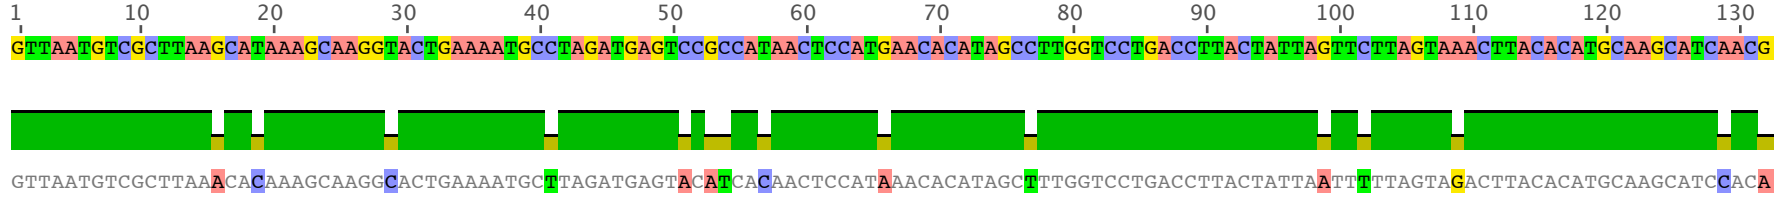

Myiodon\_darwinii\_Delsuc  
Translation

Myiodon\_darwinii\_Slater  
Translation

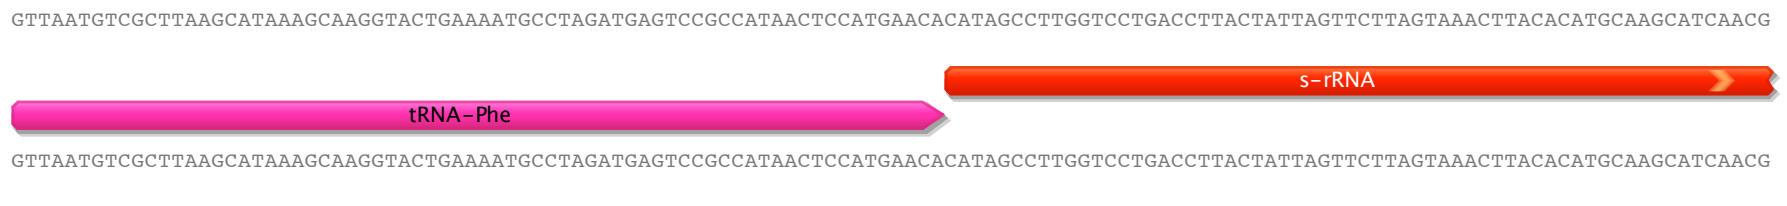

140 150 160 170 180 190 200 210 220 230 240 250 260

Consensus  
Translation

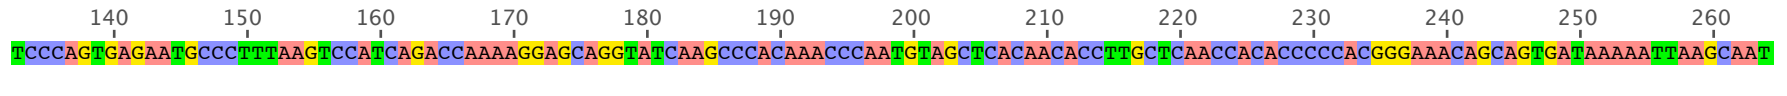

Identity

Choloepus\_didactylus\_NC  
Translation

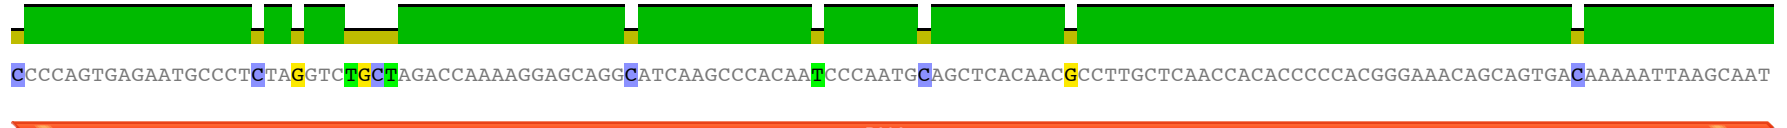

Myiodon\_darwinii\_Delsuc  
Translation

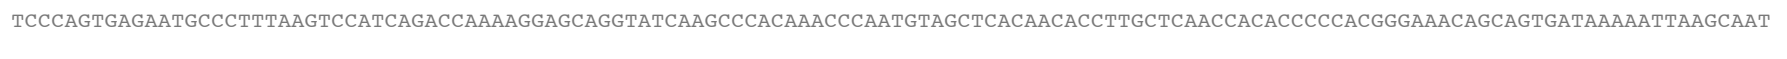

Myiodon\_darwinii\_Slater  
Translation

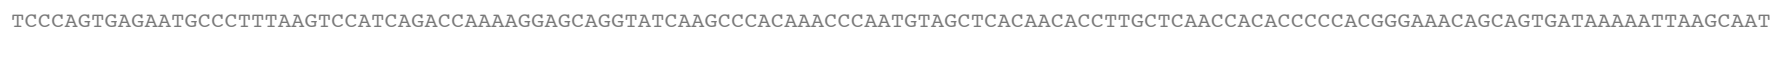

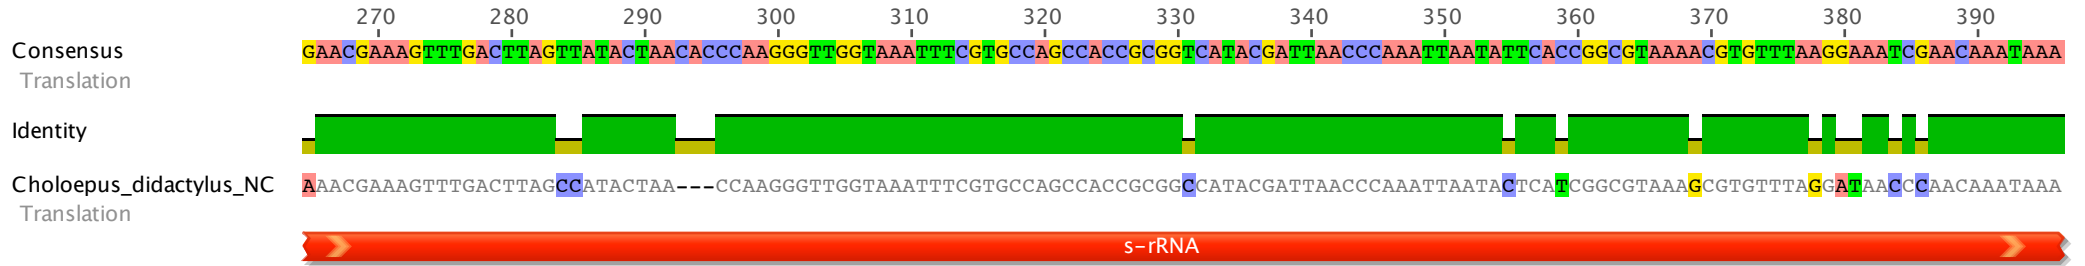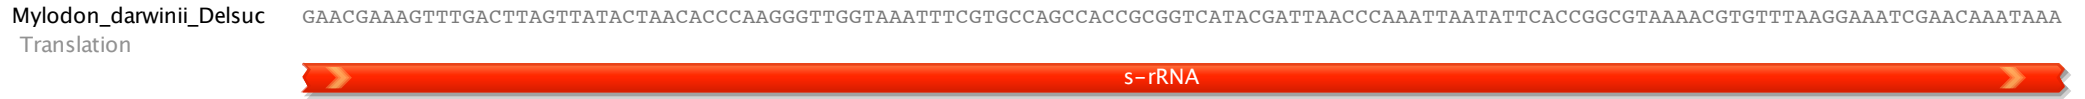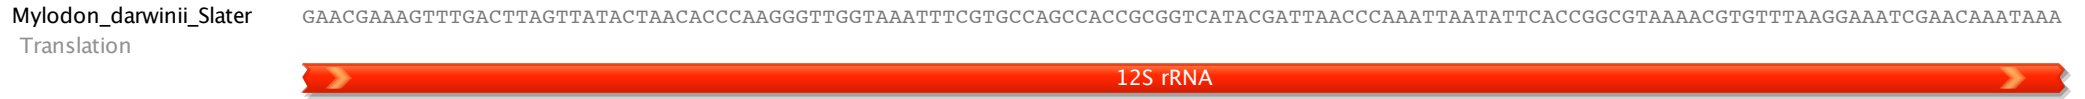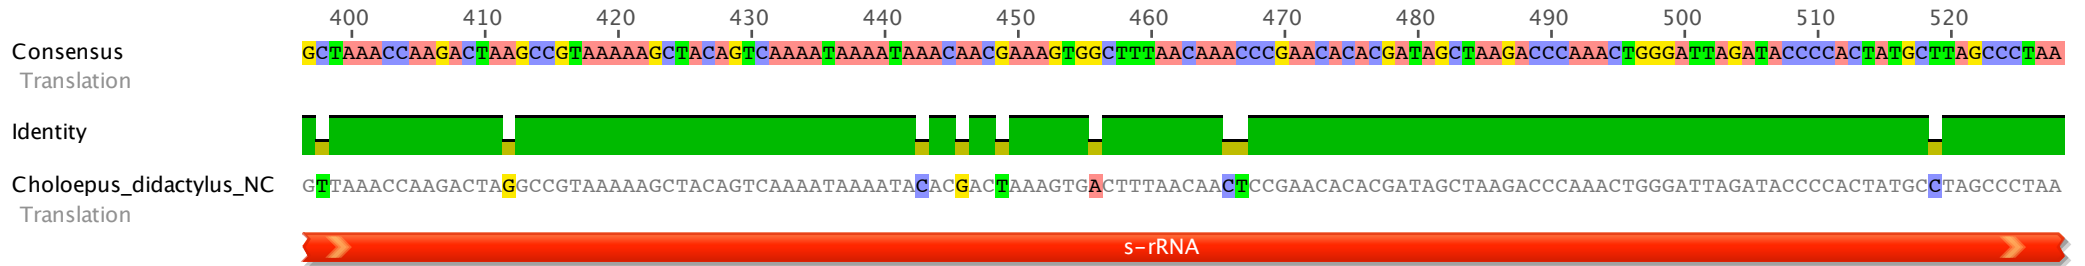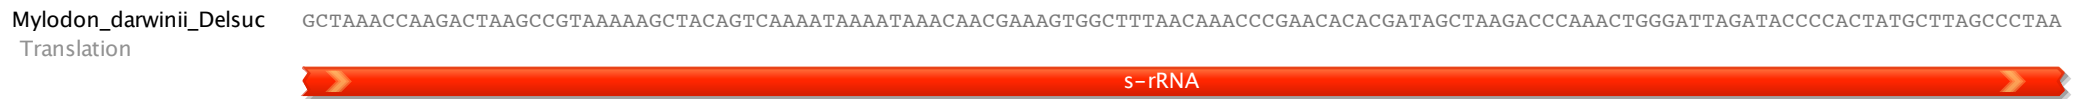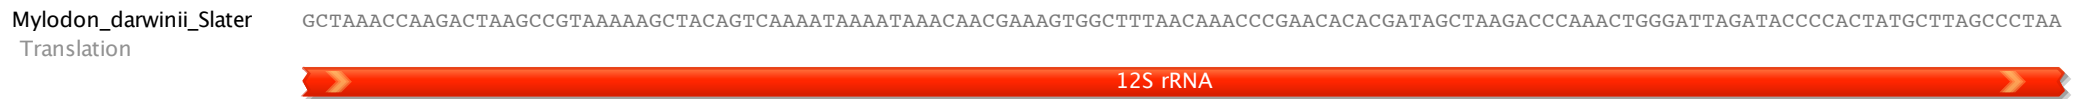

530 540 550 560 570 580 590 600 610 620 630 640 650 660  
Consensus  
Translation  
Identity

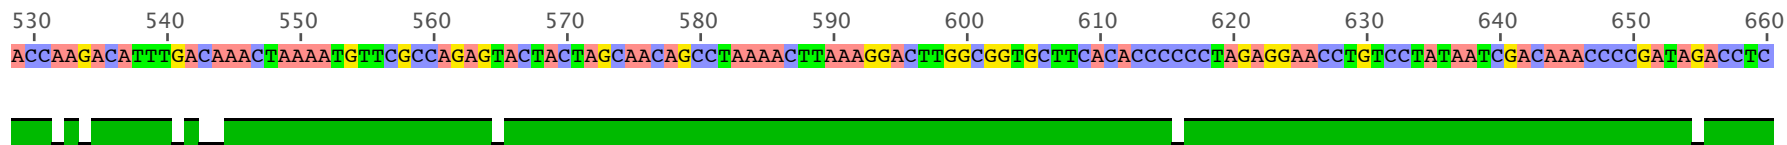

Choloepus didactylus\_NC  
Translation

ACCCAAACATTTTATCAACTAAAATGTTCCGCCAGAGCACTACTAGCAACAGCCTAAAACCTAAAGGACTTGGCGGTGCTTCACACCCCTAGAGGAACCTGTCTATAATCGACAAAACCCCGATAGACCTC

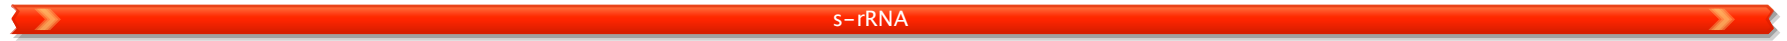

Myiodon darwinii\_Delsuc  
Translation

ACCAAGACATTTGACAAACTAAAATGTTCCGCCAGAGTACTACTAGCAACAGCCTAAAACCTAAAGGACTTGGCGGTGCTTCACACCCCCCTAGAGGAACCTGTCTATAATCGACAAAACCCCGATAGACCTC

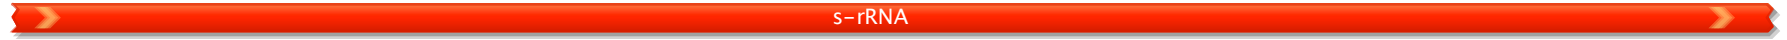

Myiodon darwinii\_Slater  
Translation

ACCAAGACATTTGACAAACTAAAATGTTCCGCCAGAGTACTACTAGCAACAGCCTAAAACCTAAAGGACTTGGCGGTGCTTCACACCCCCCTAGAGGAACCTGTCTATAATCGACAAAACCCCGATAGACCTC

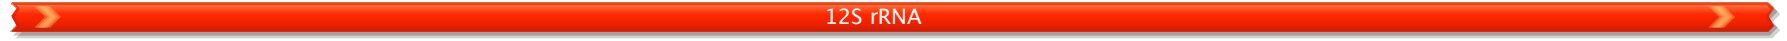

670 680 690 700 710 720 730 740 750 760 770 780 790  
Consensus  
Translation  
Identity

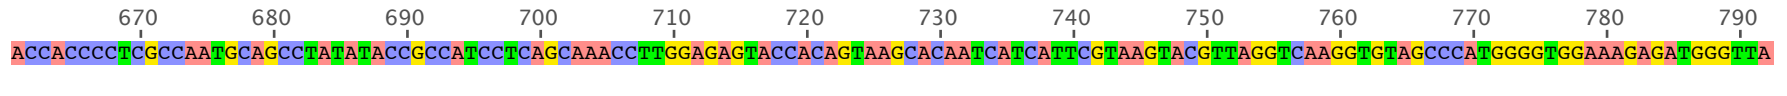

Choloepus didactylus\_NC  
Translation

ACCACCCTAGCCAAACACAGCCTATATACCGCCATCCAGCAGCAACCTTGGAGAGTACCACAGTAAGCACAATCATCATTCGTAAGTACGTTAGGTCAAGGTGTAGCCCATGAGGTGGAAAGAGATGGGTTA

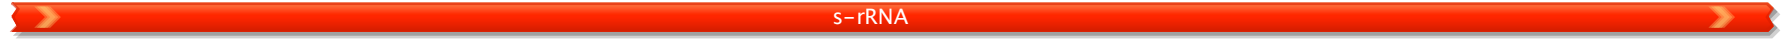

Myiodon darwinii\_Delsuc  
Translation

ACCACCCTCGCCAATGCAGCCTATATACCGCCATCCAGCAGCAACCTTGGAGAGTACCACAGTAAGCACAATCATCATTCGTAAGTACGTTAGGTCAAGGTGTAGCCCATGGGGTGGAAAGAGATGGGTTA

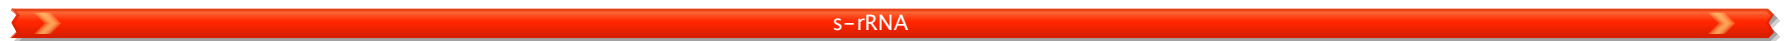

Myiodon darwinii\_Slater  
Translation

ACCACCCTCGCCAATGCAGCCTATATACCGCCATCCAGCAGCAACCTTGGAGAGTACCACAGTAAGCACAATCATCATTCGTAAGTACGTTAGGTCAAGGTGTAGCCCATGGGGTGGAAAGAGATGGGTTA

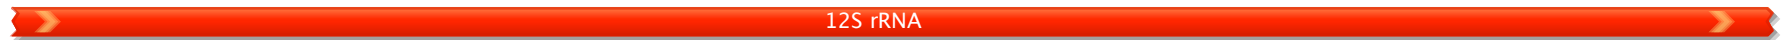

800 810 820 830 840 850 860 870 880 890 900 910 920

Consensus  
Translation

Identity

Choloepus\_didactylus\_NC  
Translation

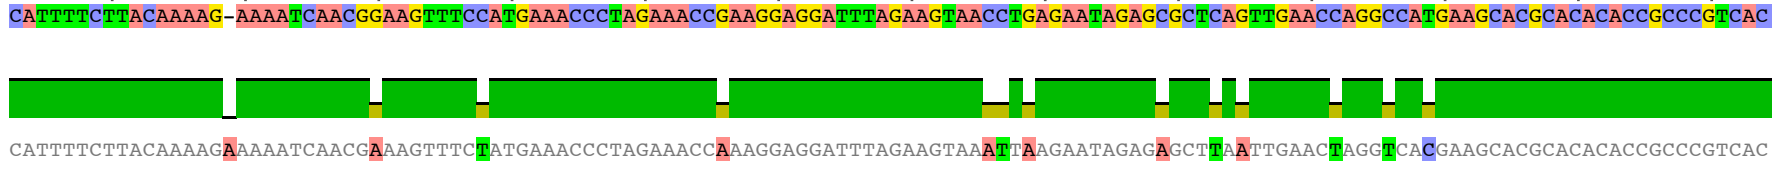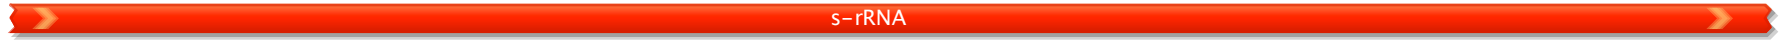

Myiodon\_darwinii\_Delsuc  
Translation

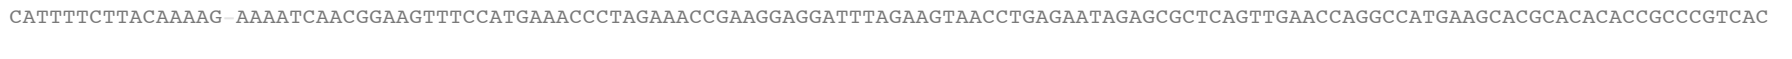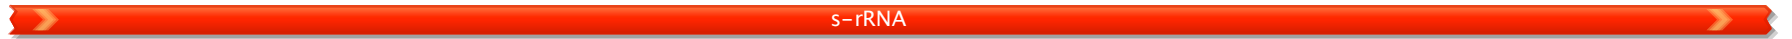

Myiodon\_darwinii\_Slater  
Translation

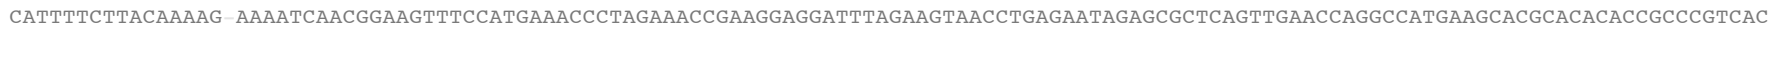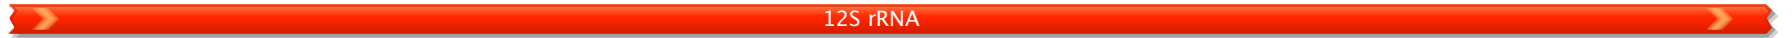

930 940 950 960 970 980 990 1,000 1,010 1,020 1,030 1,040 1,050

Consensus  
Translation

Identity

Choloepus\_didactylus\_NC  
Translation

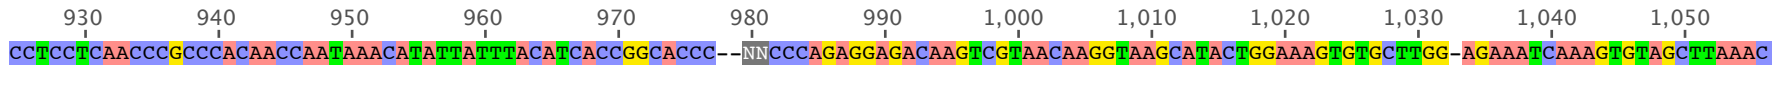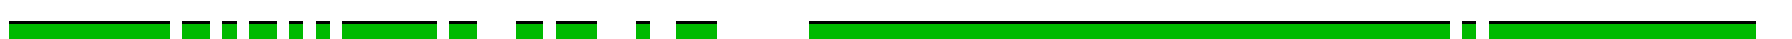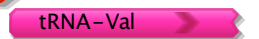

Myiodon\_darwinii\_Delsuc  
Translation

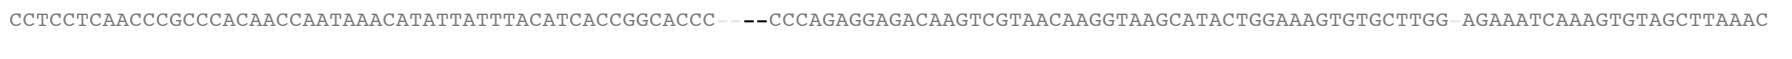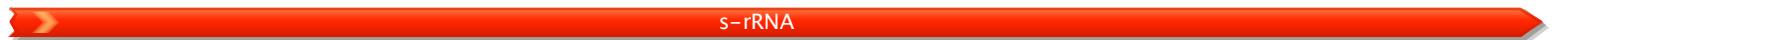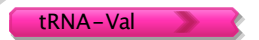

Myiodon\_darwinii\_Slater  
Translation

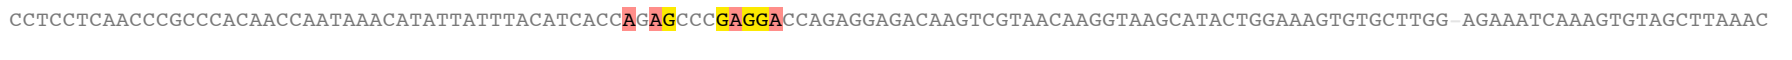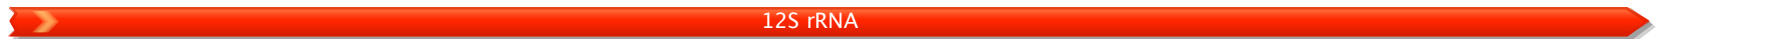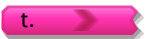

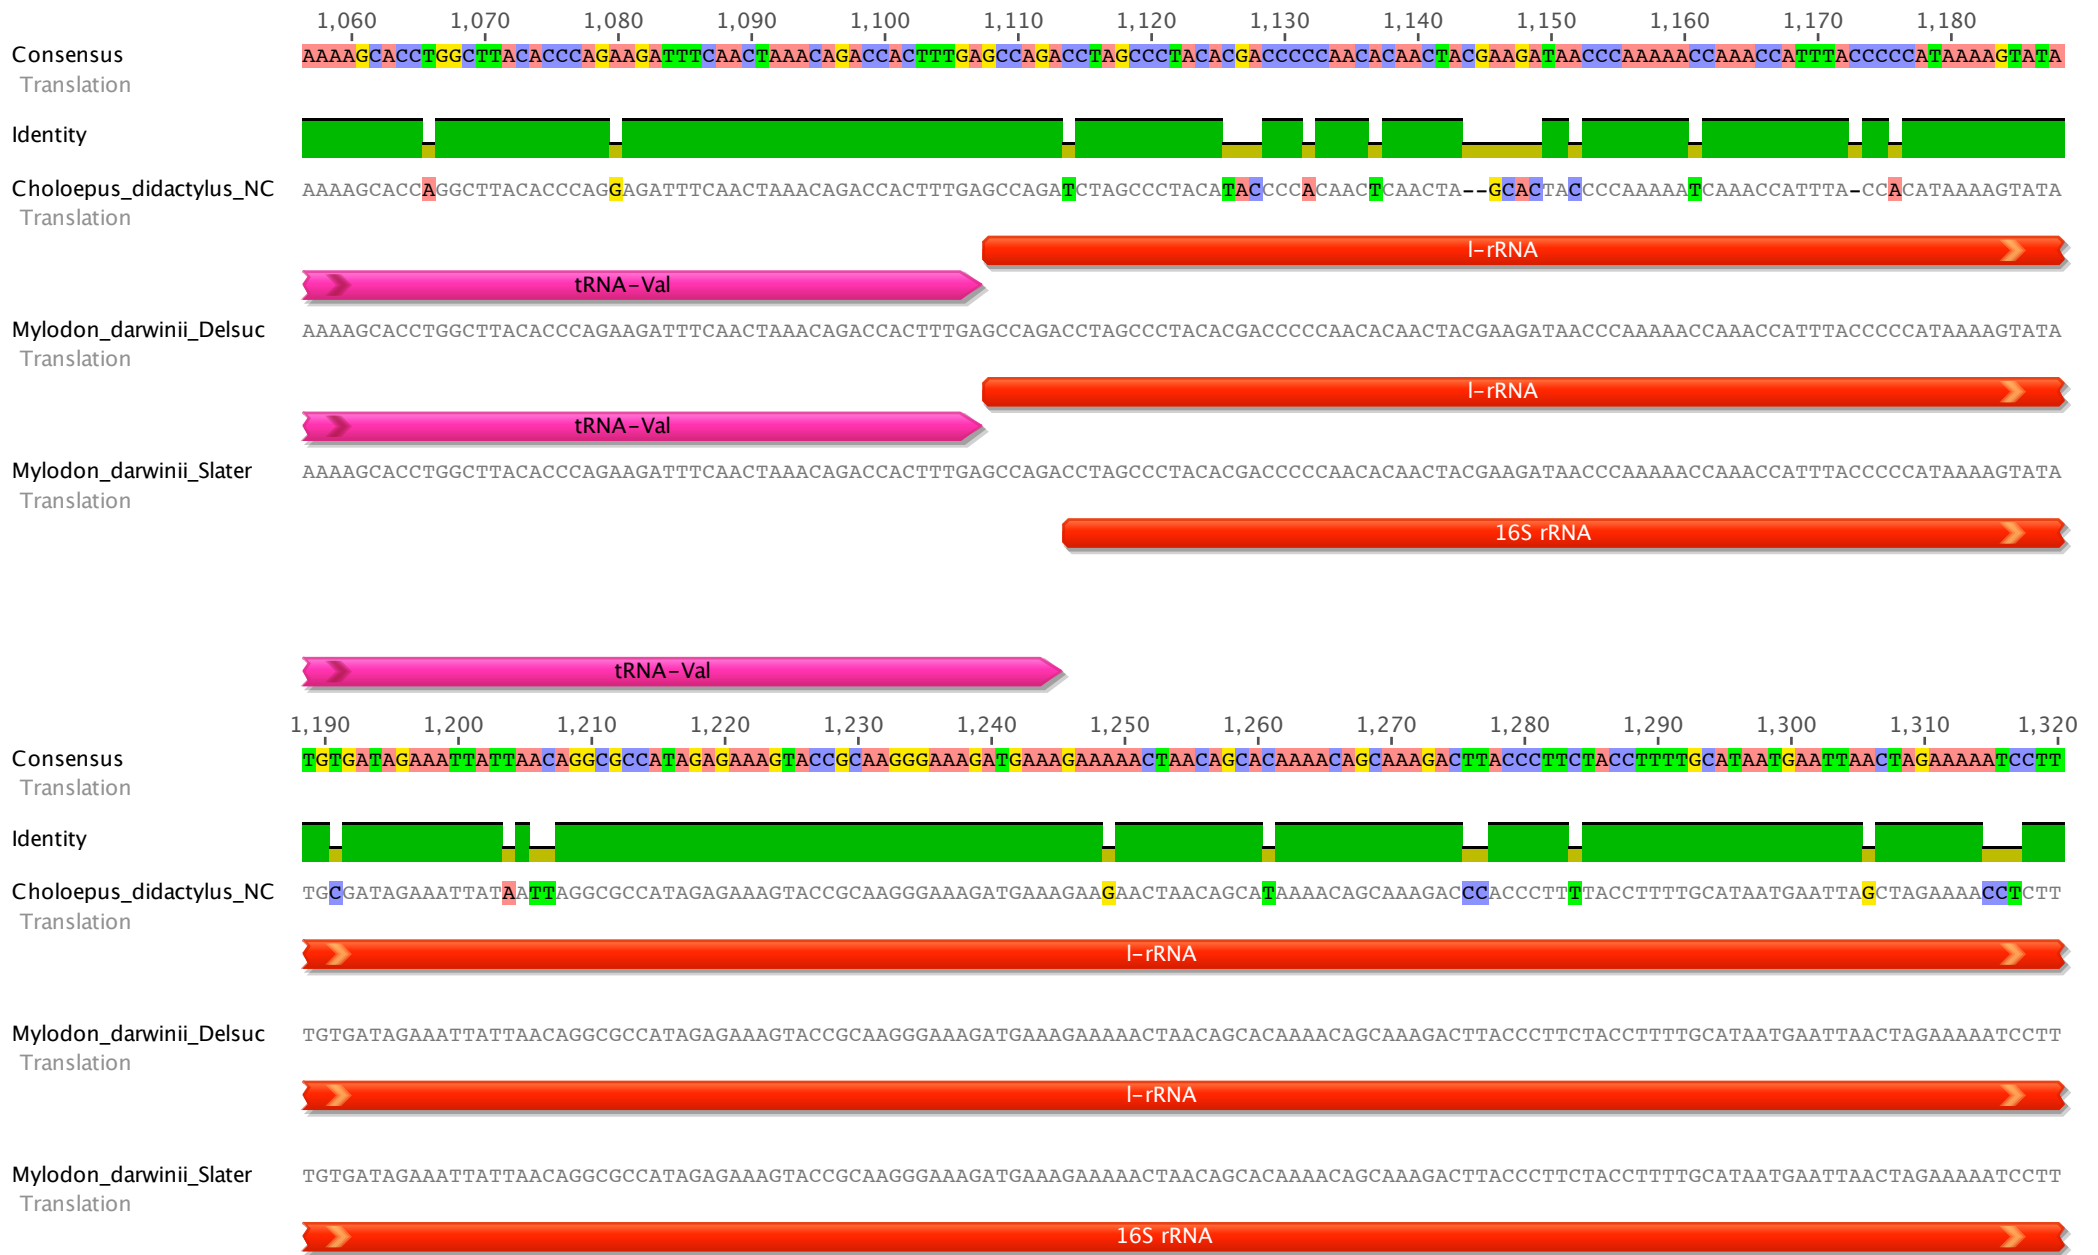

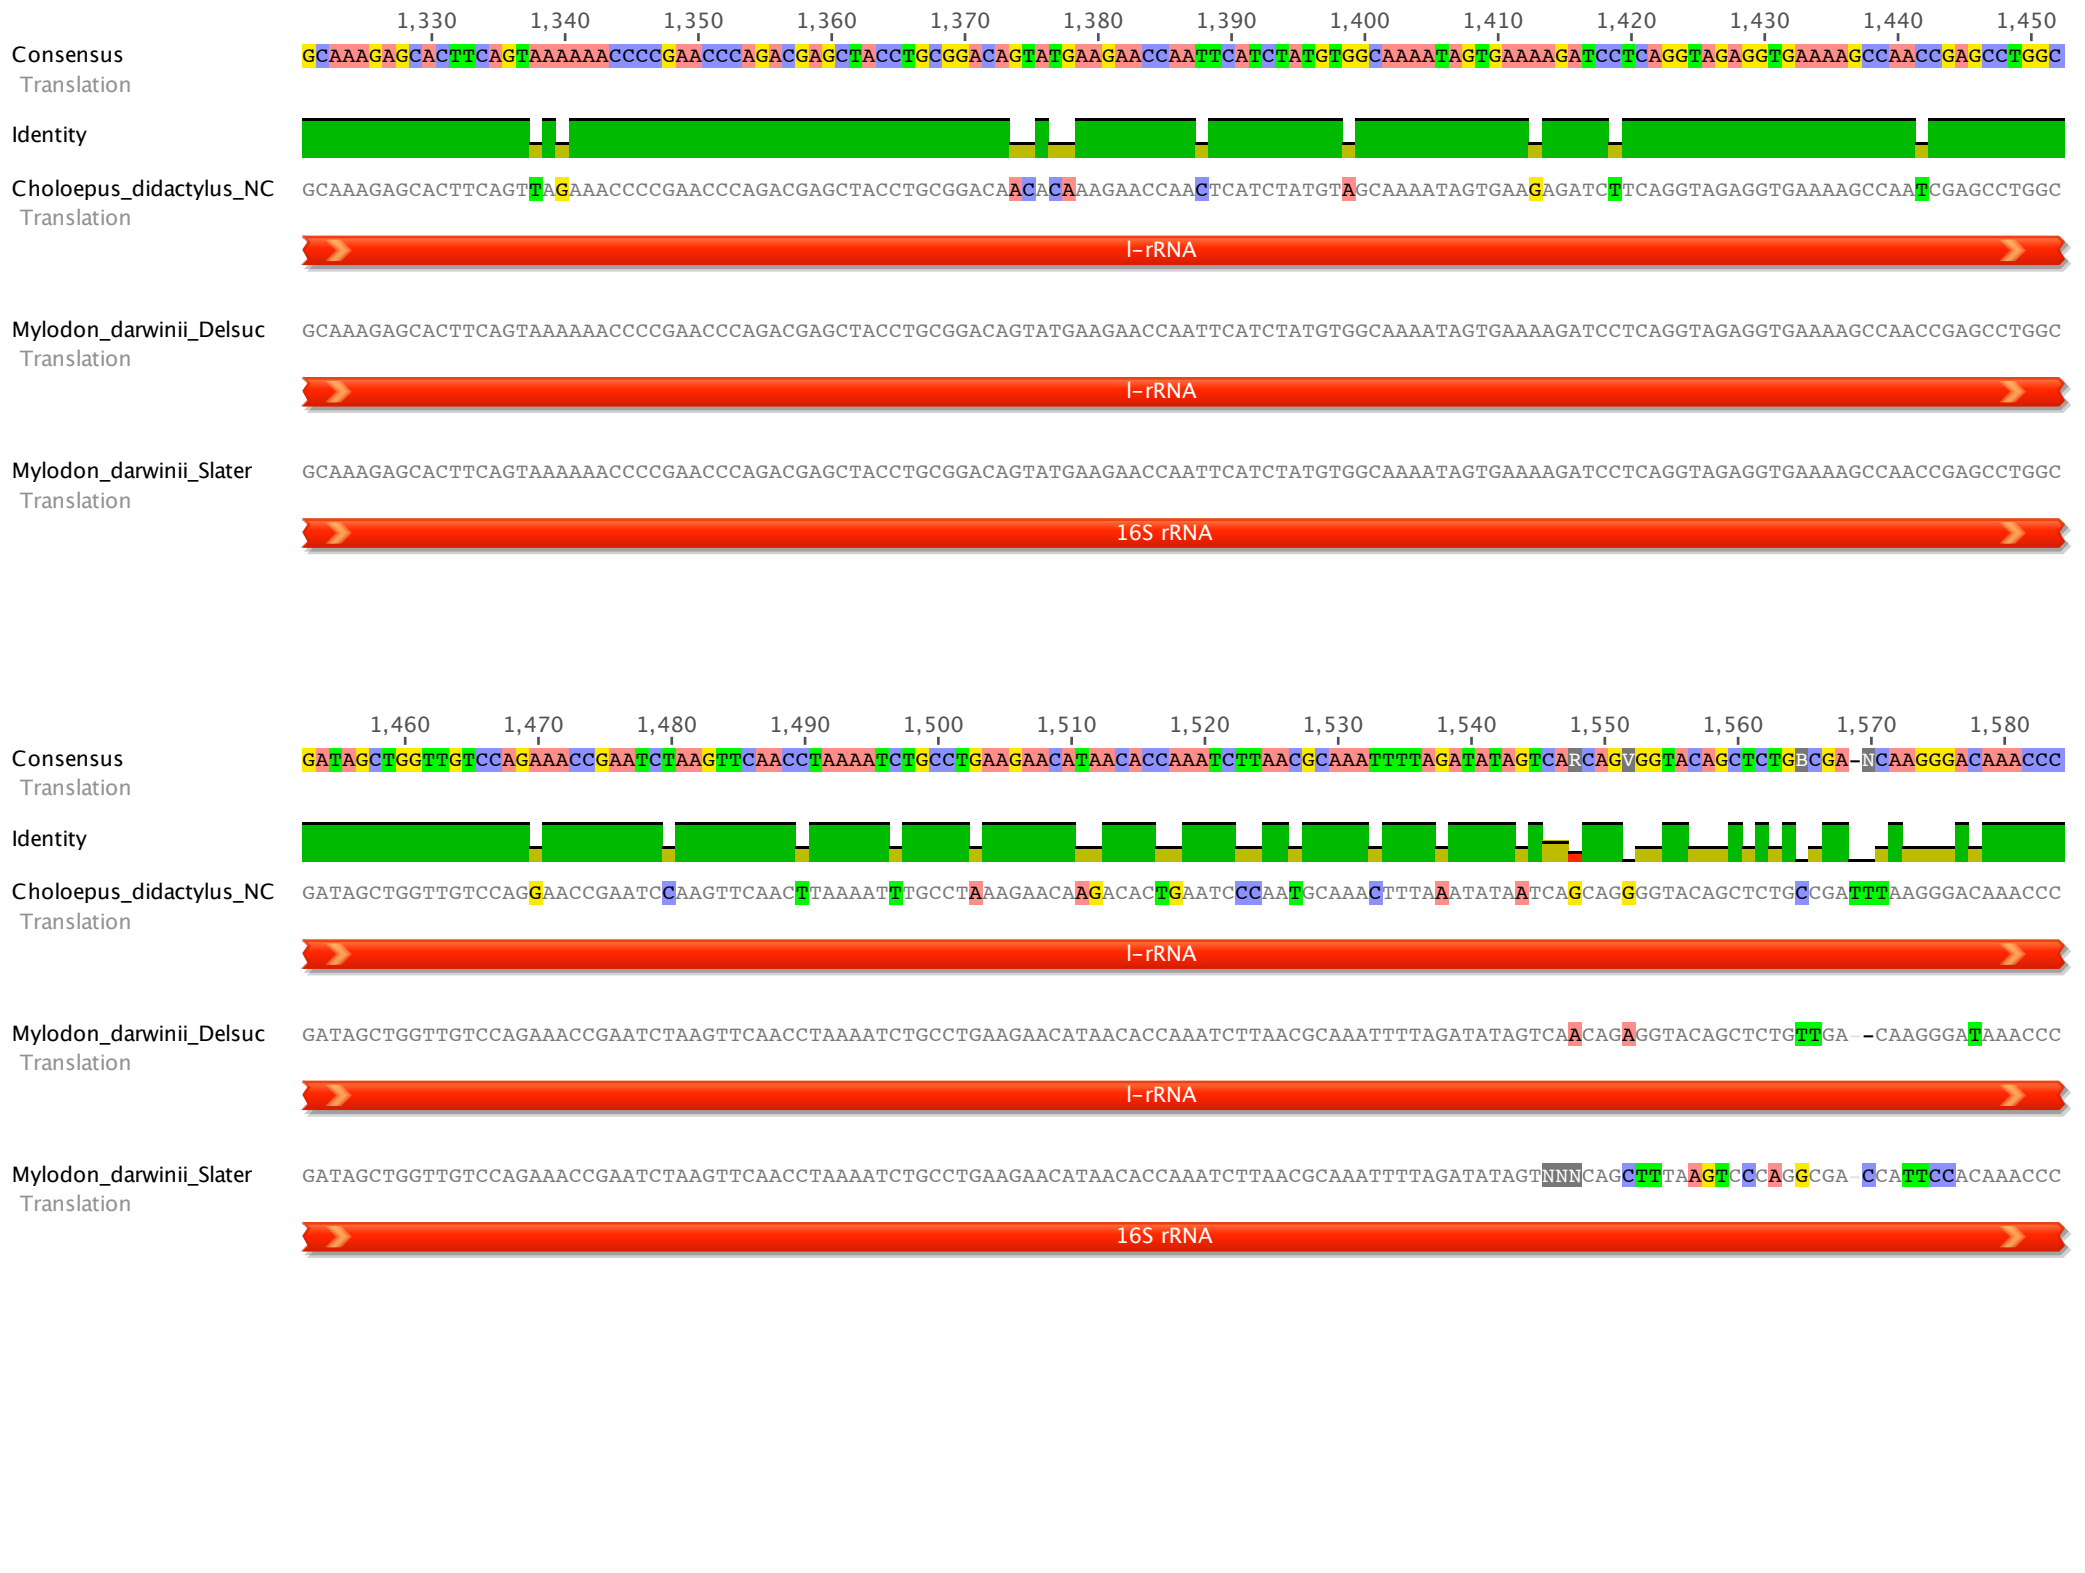



1,590 1,600 1,610 1,620 1,630 1,640 1,650 1,660 1,670 1,680 1,690 1,700 1,710  
Consensus  
Translation  
Identity

Choloepus\_didactylus\_NC  
Translation  
I-rRNA

Myiodon\_darwinii\_Delsuc  
Translation  
I-rRNA

Myiodon\_darwinii\_Slater  
Translation  
16S rRNA

1,720 1,730 1,740 1,750 1,760 1,770 1,780 1,790 1,800 1,810 1,820 1,830 1,840  
Consensus  
Translation  
Identity

Choloepus\_didactylus\_NC  
Translation  
I-rRNA

Myiodon\_darwinii\_Delsuc  
Translation  
I-rRNA

Myiodon\_darwinii\_Slater  
Translation  
16S rRNA

1,850 1,860 1,870 1,880 1,890 1,900 1,910 1,920 1,930 1,940 1,950 1,960 1,970 1,980

Consensus  
Translation  
 ACCACTAAACATATTCAAGTCTNCCCCACTGTTAACCCAACACAGGTGTGCATACTGGAAAGATTAAAAGAAGCAGAAGGAACTCGGCAAATATAAATCCCGCCTGTTTACCAAAAACATCACCTCTAGCAT

Identity

Choloepus\_didactylus\_NC  
Translation  
 ACCACCAAATACCACCGAGTCTTACCCATTGTTAACCCAACACAGGCRGTGGCACTGGAAAGATTAAAAGAAGTAAAGGAACTCGGCAAAACACAAATCCCGCCTGTTTACCAAAAACATCACCTCTAGCAT

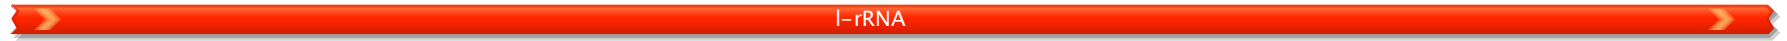

Myiodon\_darwinii\_Delsuc  
Translation  
 ACCACTAAACATATTCAAGTCTCCCCACTGTTAACCCAACACAGGTGTGCATACTGGAAAGATTAAAAGAAGCAGAAGGAACTCGGCAAAATATAAATCCCGCCTGTTTACCAAAAACATCACCTCTAGCAT

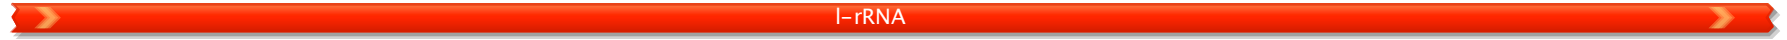

Myiodon\_darwinii\_Slater  
Translation  
 ACCACTAAACATATTCAAGTCT-CCCCACTGTTAACCCAACACAGGTGTGCATACTGGAAAGATTAAAAGAAGCAGAAGGAACTCGGCAAAATATAAATCCCGCCTGTTTACCAAAAACATCACCTCTAGCAT

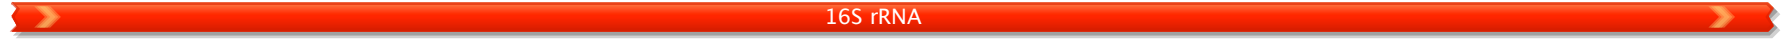

1,990 2,000 2,010 2,020 2,030 2,040 2,050 2,060 2,070 2,080 2,090 2,100 2,110

Consensus  
Translation  
 AACAACTATTAGAGGCACCTGCCTGCCAGTGACATATGTTAAACGGCCGCGGTACCCTGACCGTGCAAAGGTAGCATAATCATTGTTCCTTAATTAAGGACTTGTATGAAAGGCCCAACGAGGATTTTACT

Identity

Choloepus\_didactylus\_NC  
Translation  
 AACAACTATTAGAGGCACCTGCCTGCCAGTGACATATGTTAAACGGCCGCGGTACCCTGACCGTGCAAAGGTAGCATAATCATTGTTCCTTAATTAAGGACTTGTATGAAAGGCCCAACGAGGATTTTACT

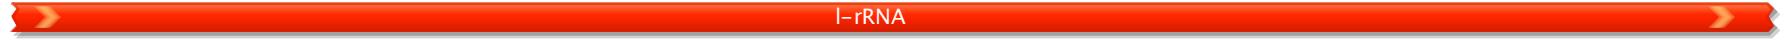

Myiodon\_darwinii\_Delsuc  
Translation  
 AACAACTATTAGAGGCACCTGCCTGCCAGTGACATATGTTAAACGGCCGCGGTACCCTGACCGTGCAAAGGTAGCATAATCATTGTTCCTTAATTAAGGACTTGTATGAAAGGCCCAACGAGGATTTTACT

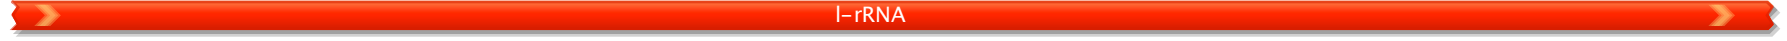

Myiodon\_darwinii\_Slater  
Translation  
 AACAACTATTAGAGGCACCTGCCTGCCAGTGACATATGTTAAACGGCCGCGGTACCCTGACCGTGCAAAGGTAGCATAATCATTGTTCCTTAATTAAGGACTTGTATGAAAGGCCCAACGAGGATTTTACT

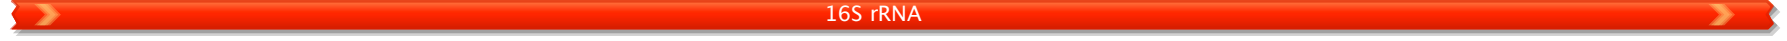

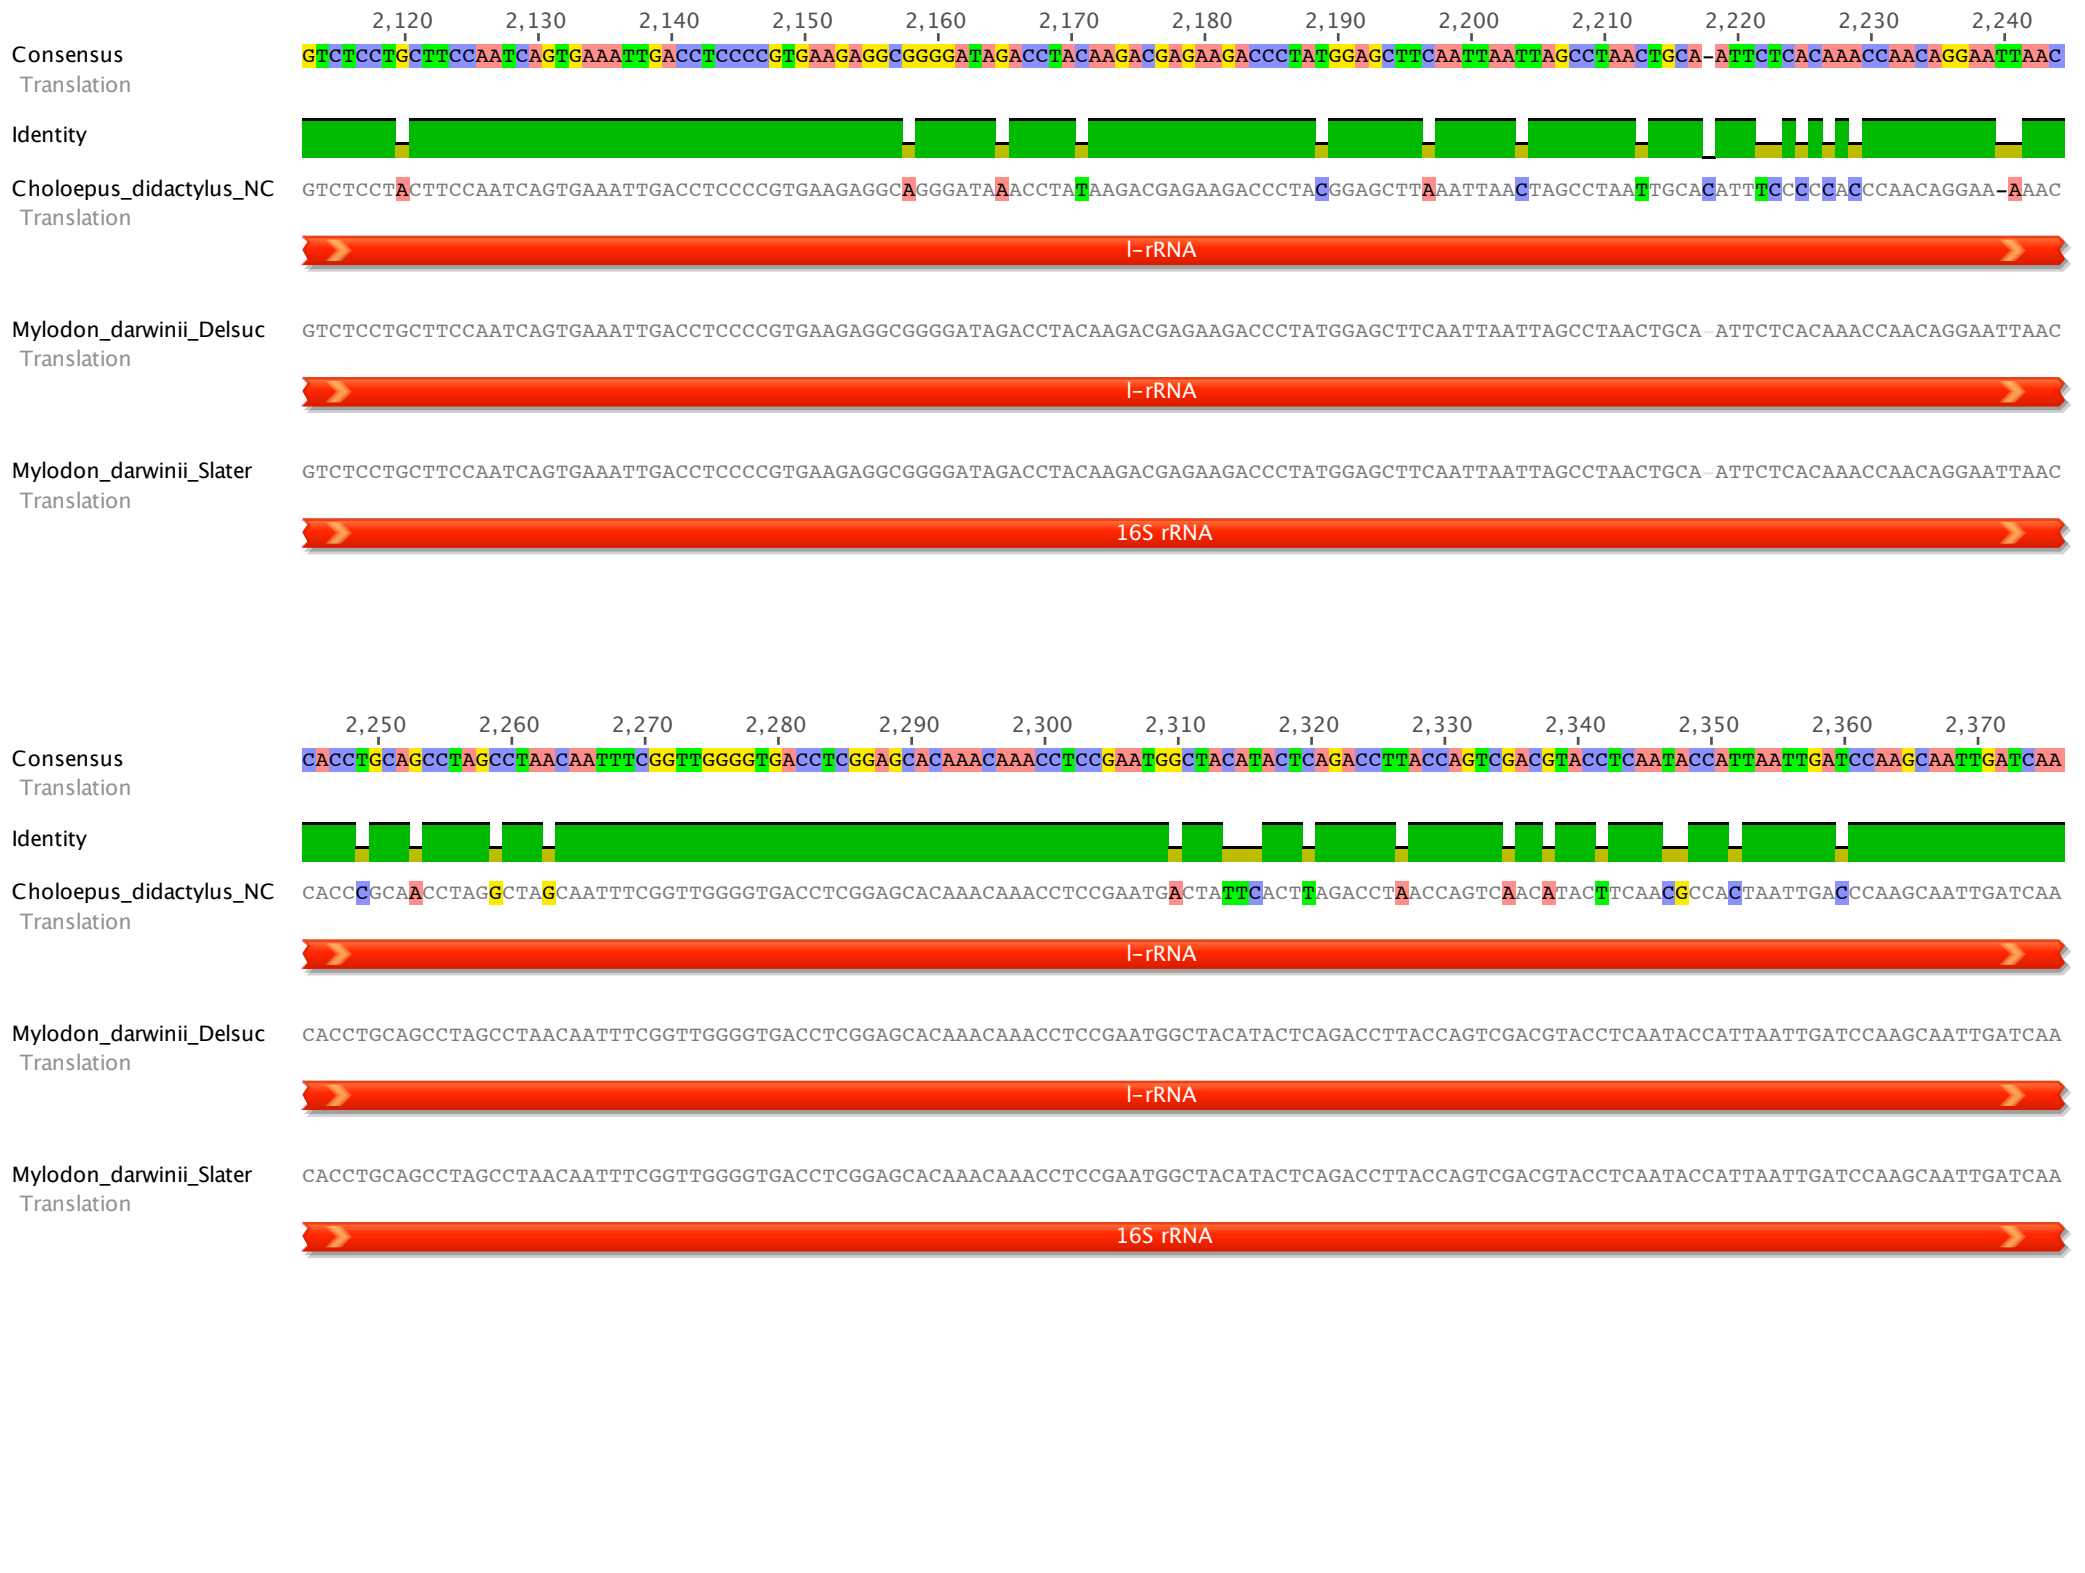

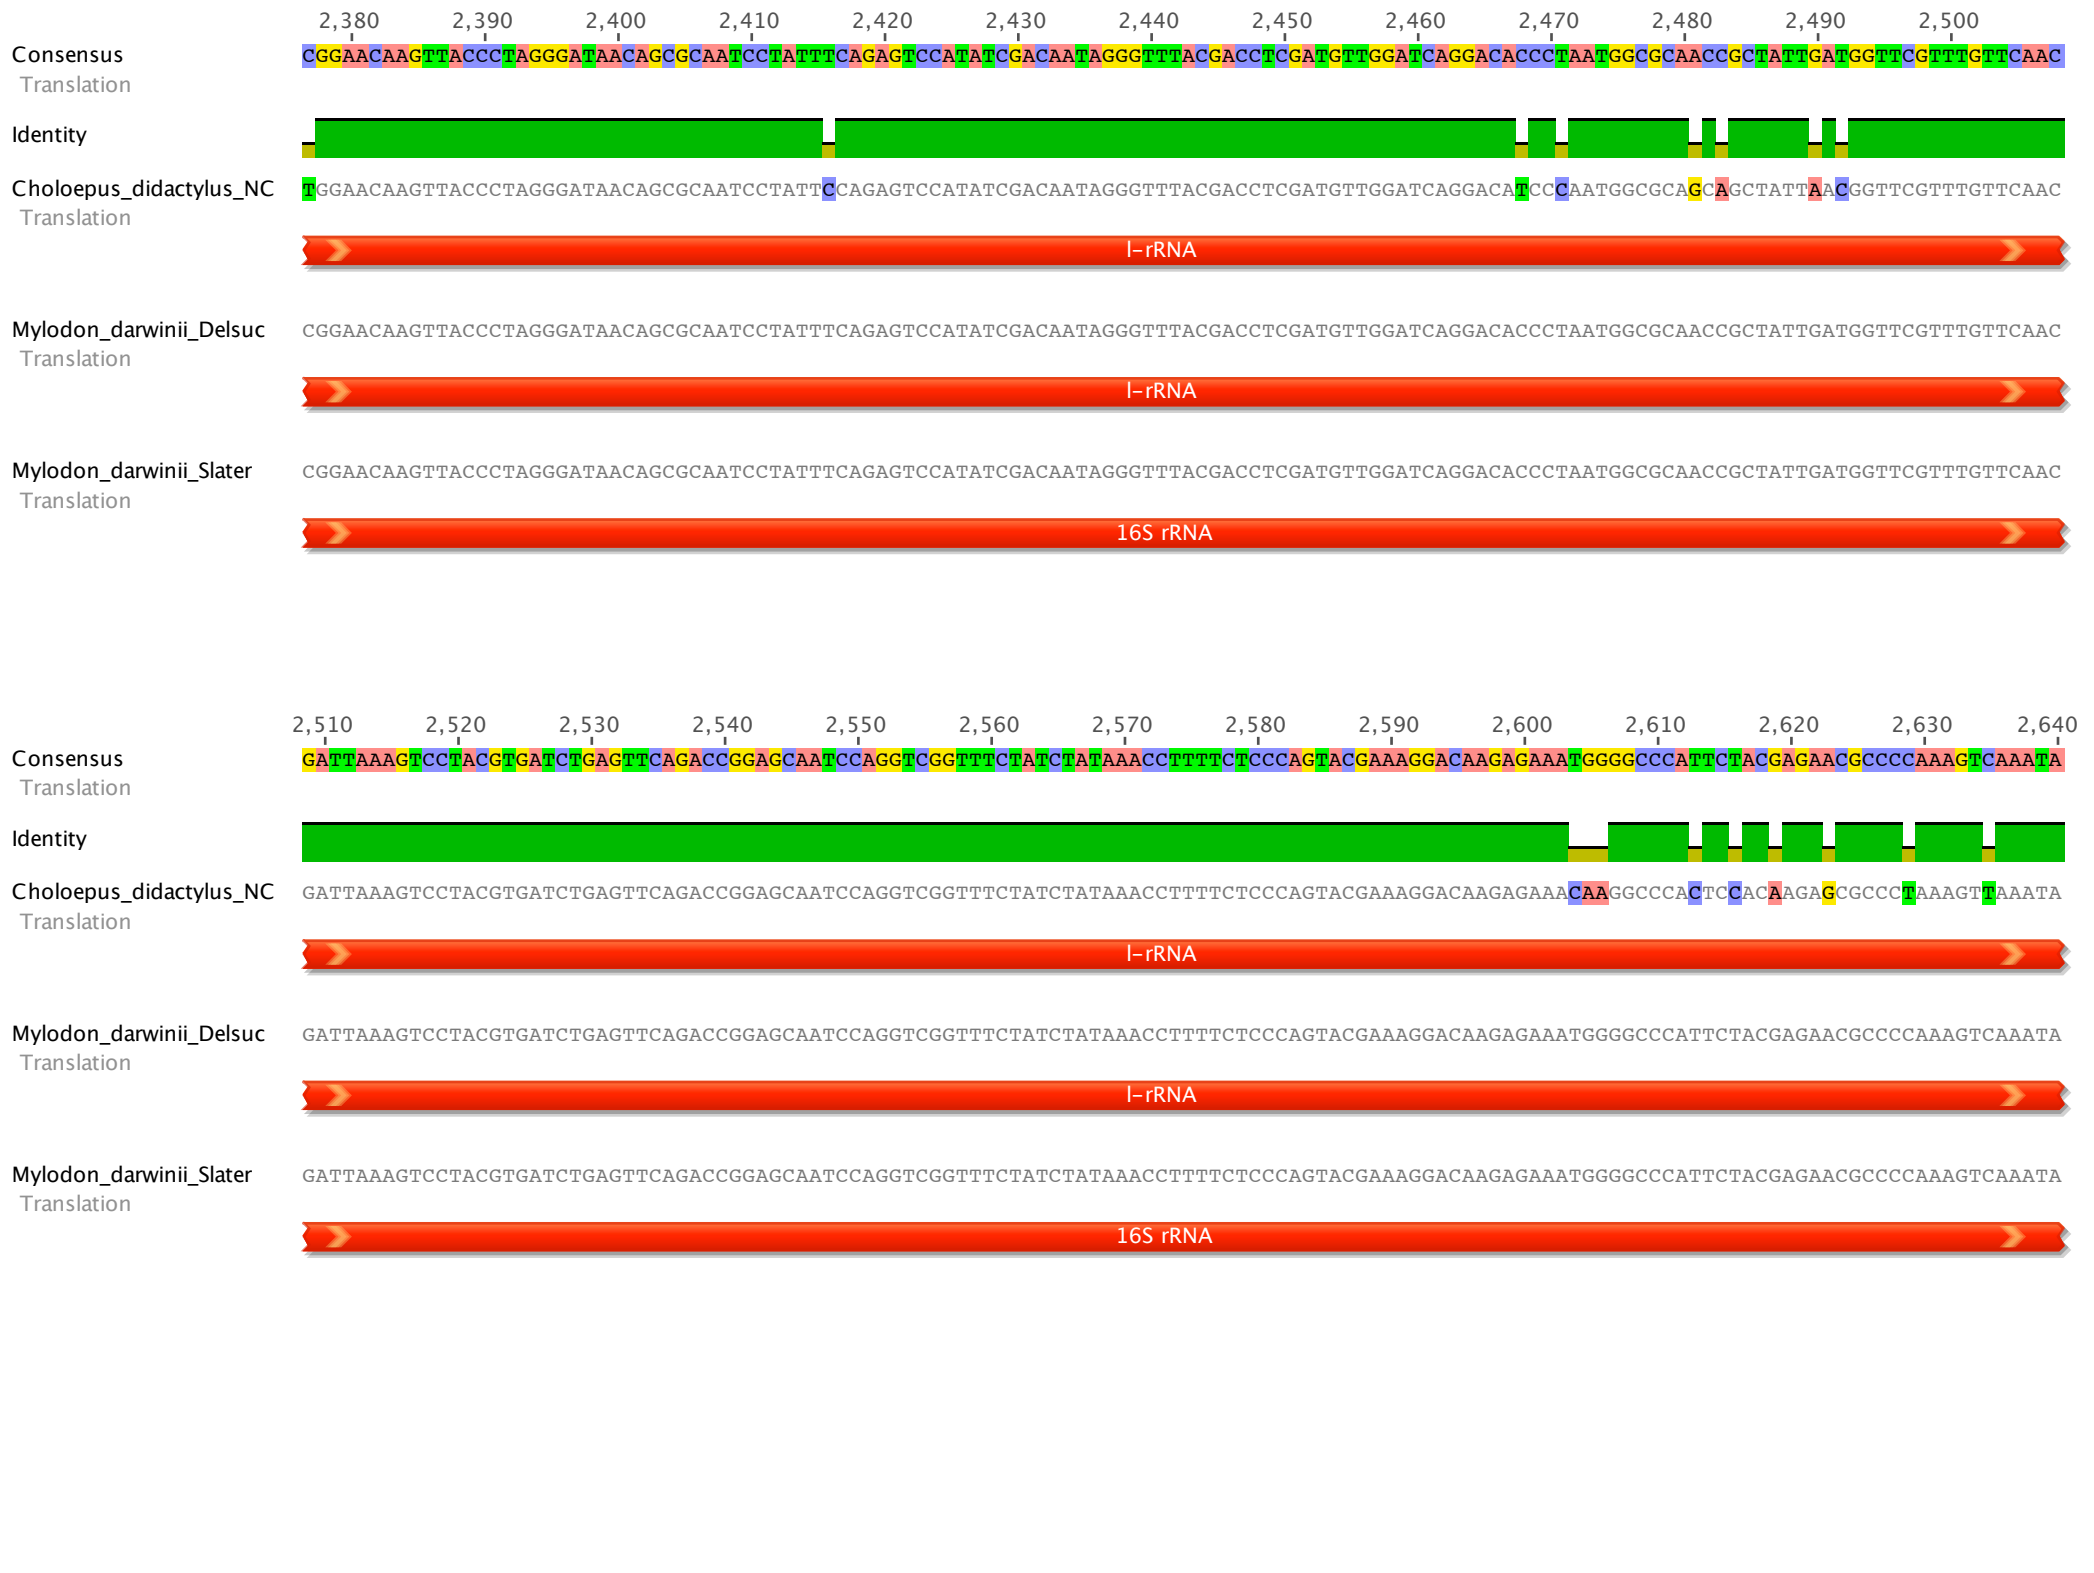

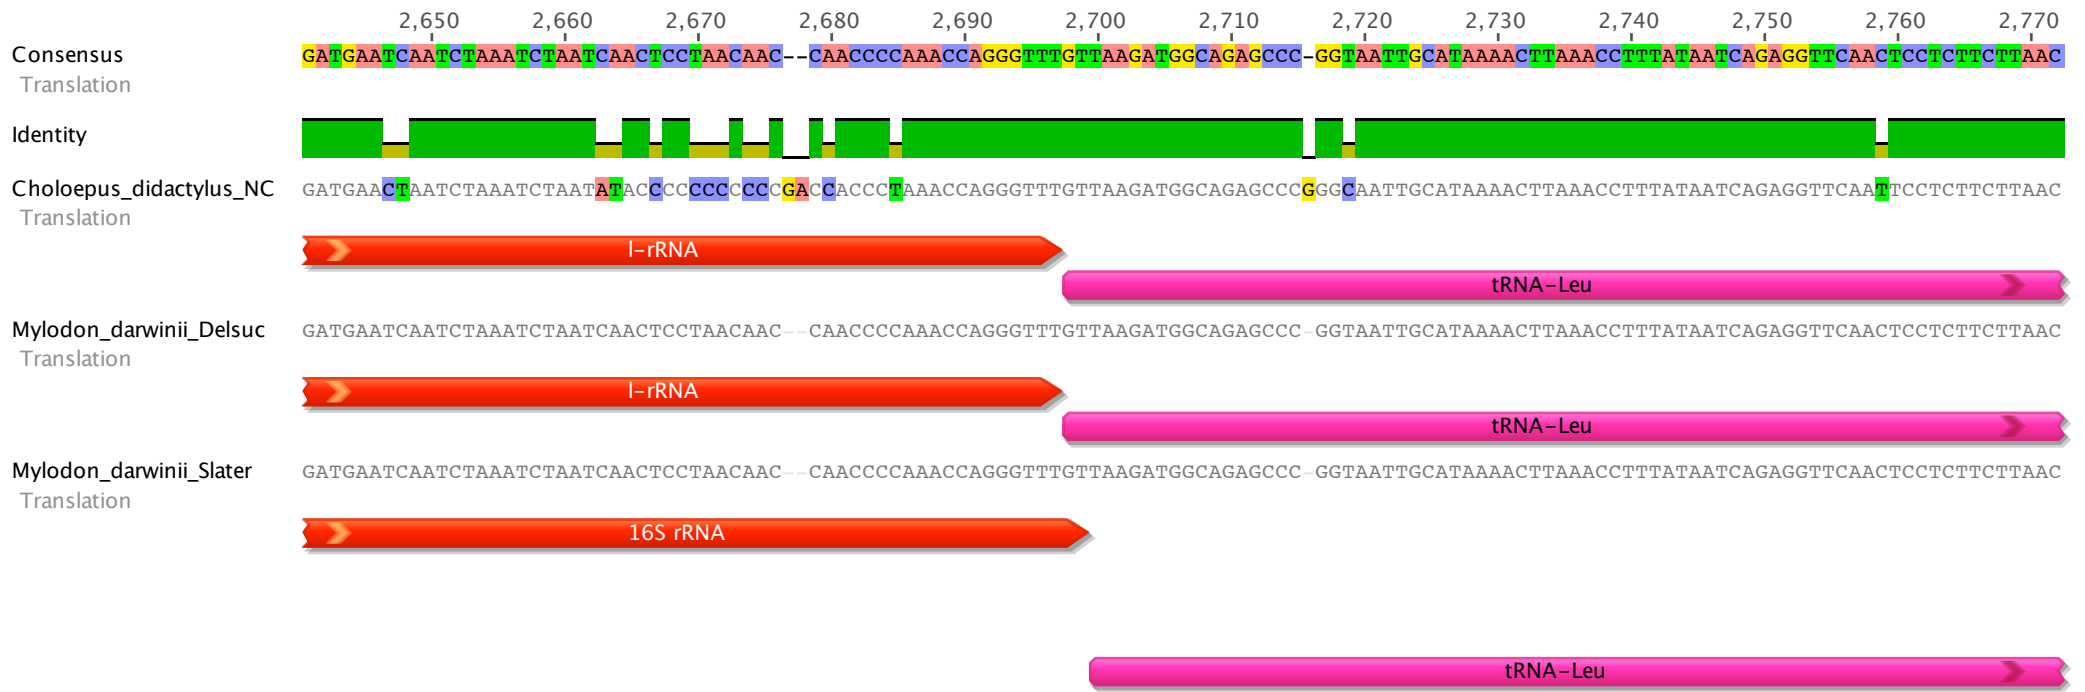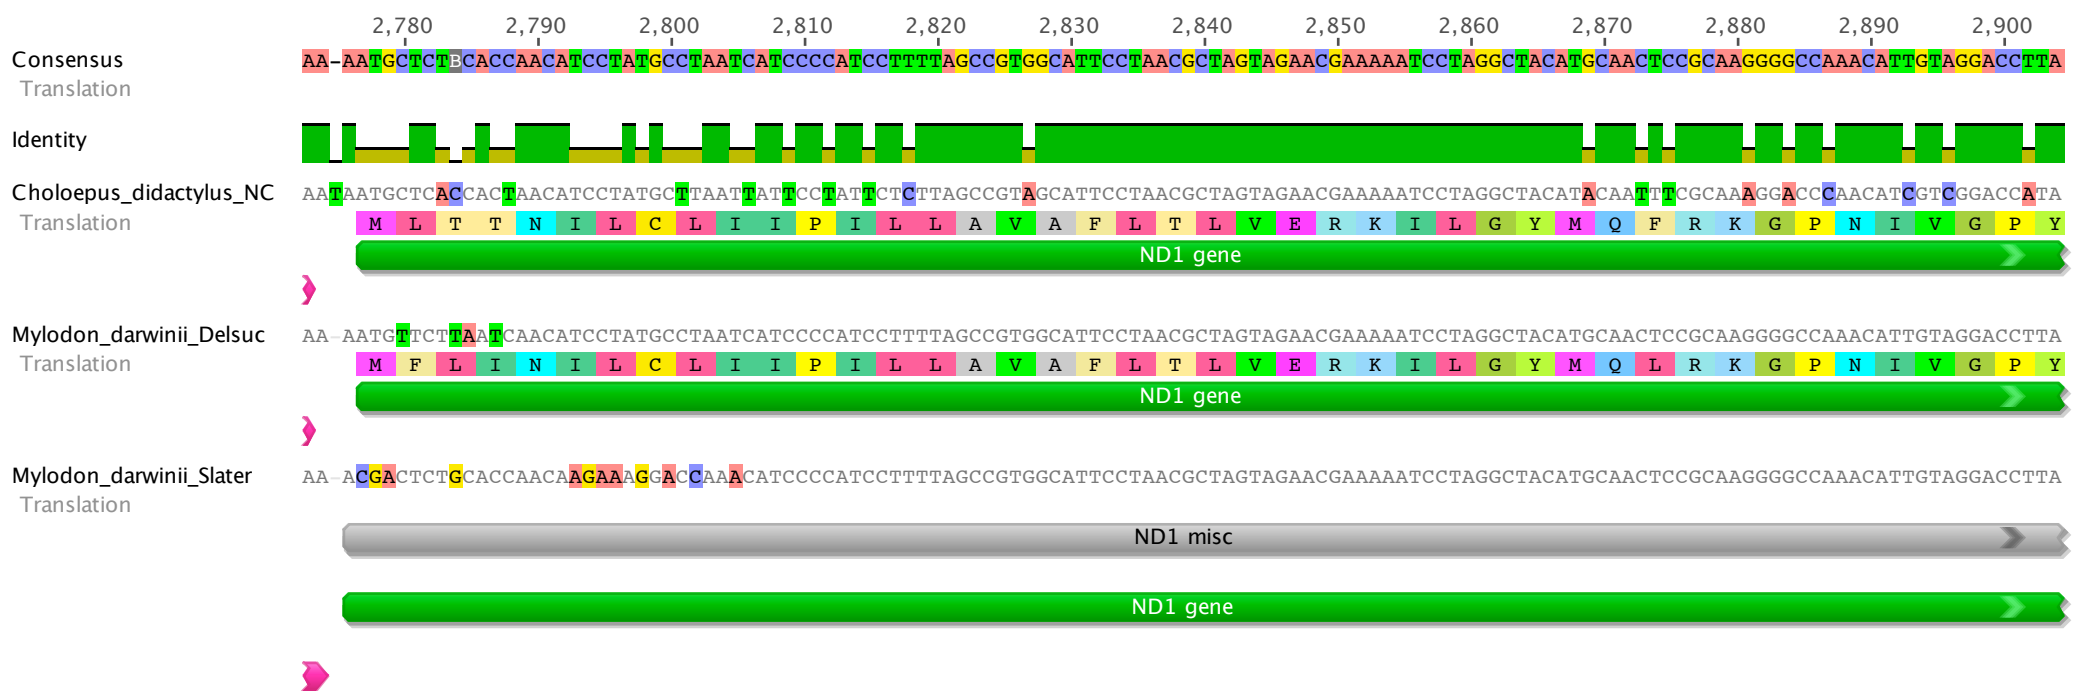

2,910 2,920 2,930 2,940 2,950 2,960 2,970 2,980 2,990 3,000 3,010 3,020 3,030

Consensus  
Translation

Identity

Choloepus\_didactylus\_NC  
Translation

ND1 gene

Myiodon\_darwinii\_Delsuc  
Translation

ND1 gene

Myiodon\_darwinii\_Slater  
Translation

ND1 misc

ND1 gene

3,040 3,050 3,060 3,070 3,080 3,090 3,100 3,110 3,120 3,130 3,140 3,150 3,160

Consensus  
Translation

Identity

Choloepus\_didactylus\_NC  
Translation

ND1 gene

Myiodon\_darwinii\_Delsuc  
Translation

ND1 gene

Myiodon\_darwinii\_Slater  
Translation

ND1 misc

ND1 gene



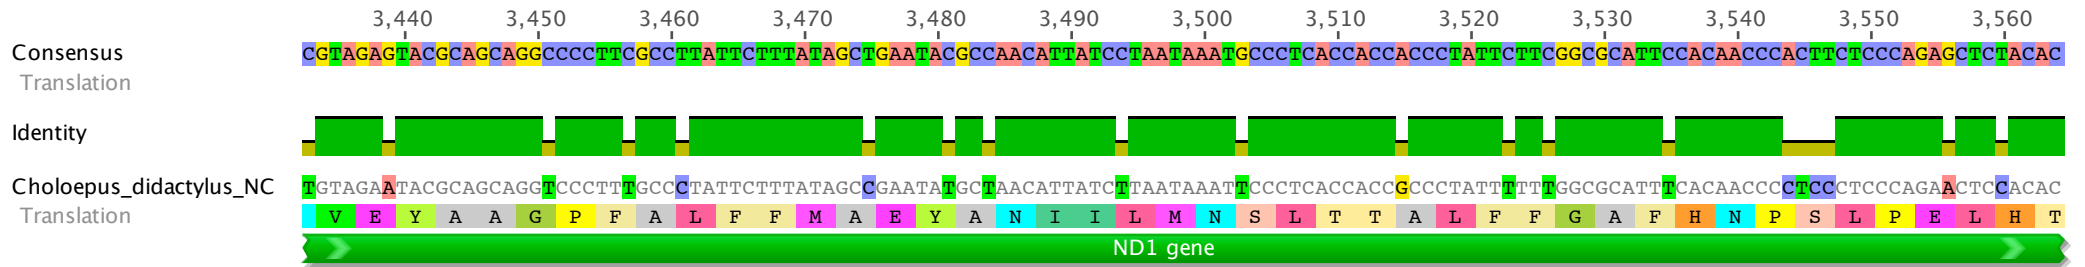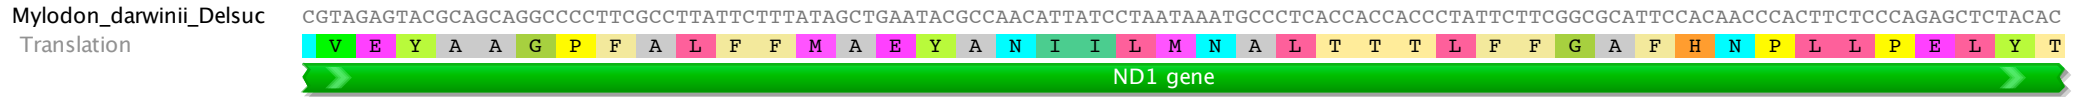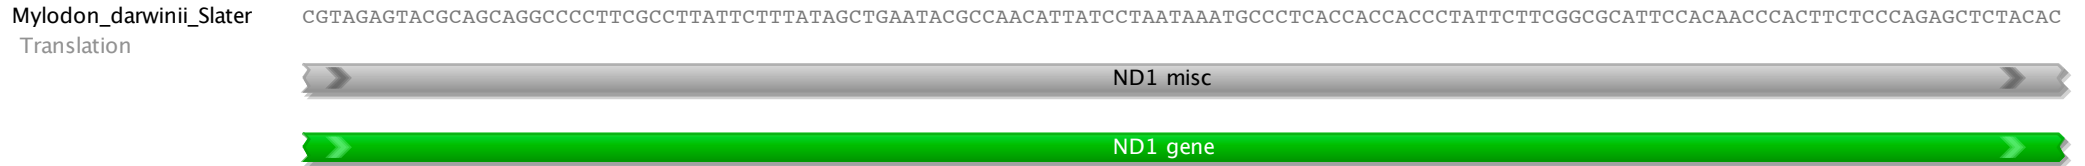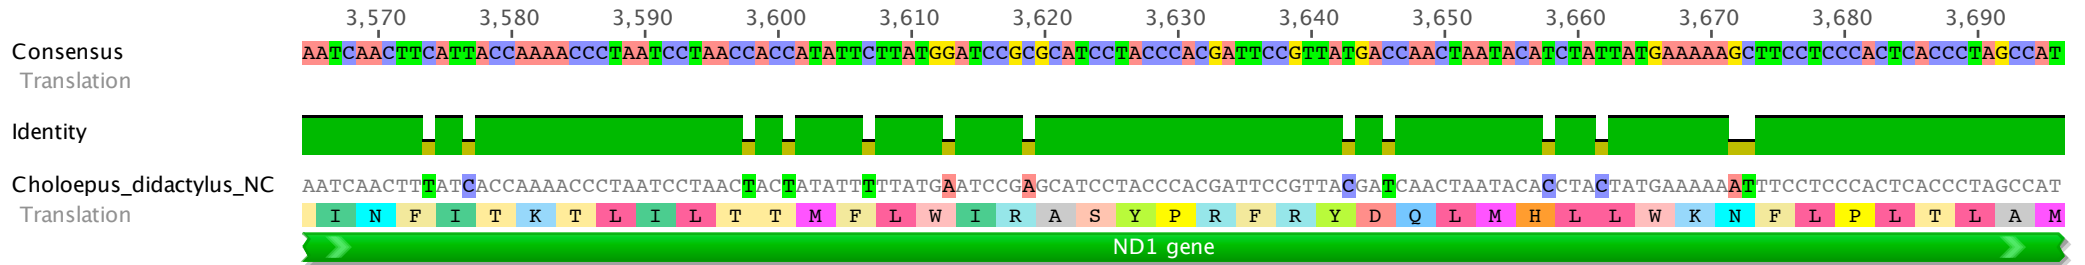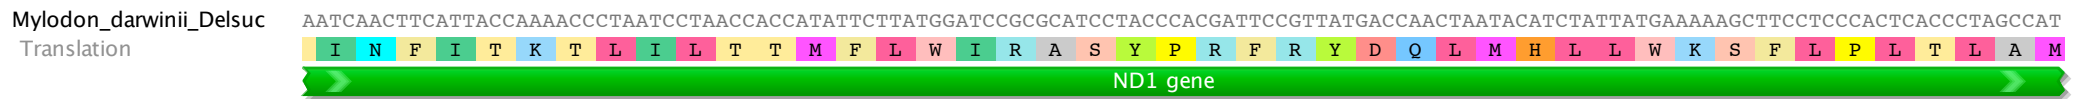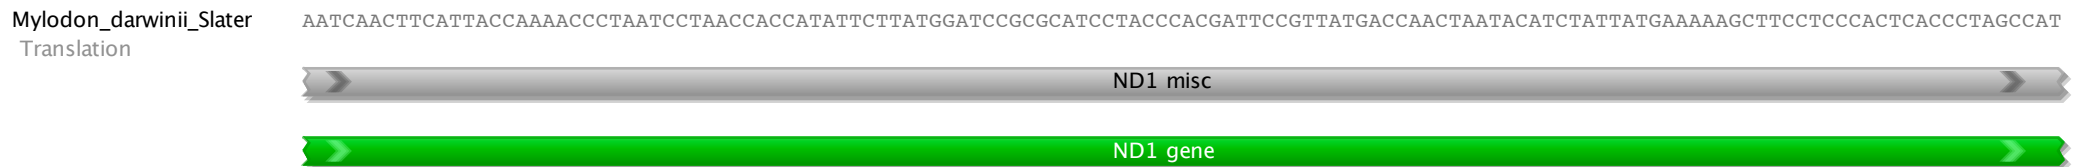



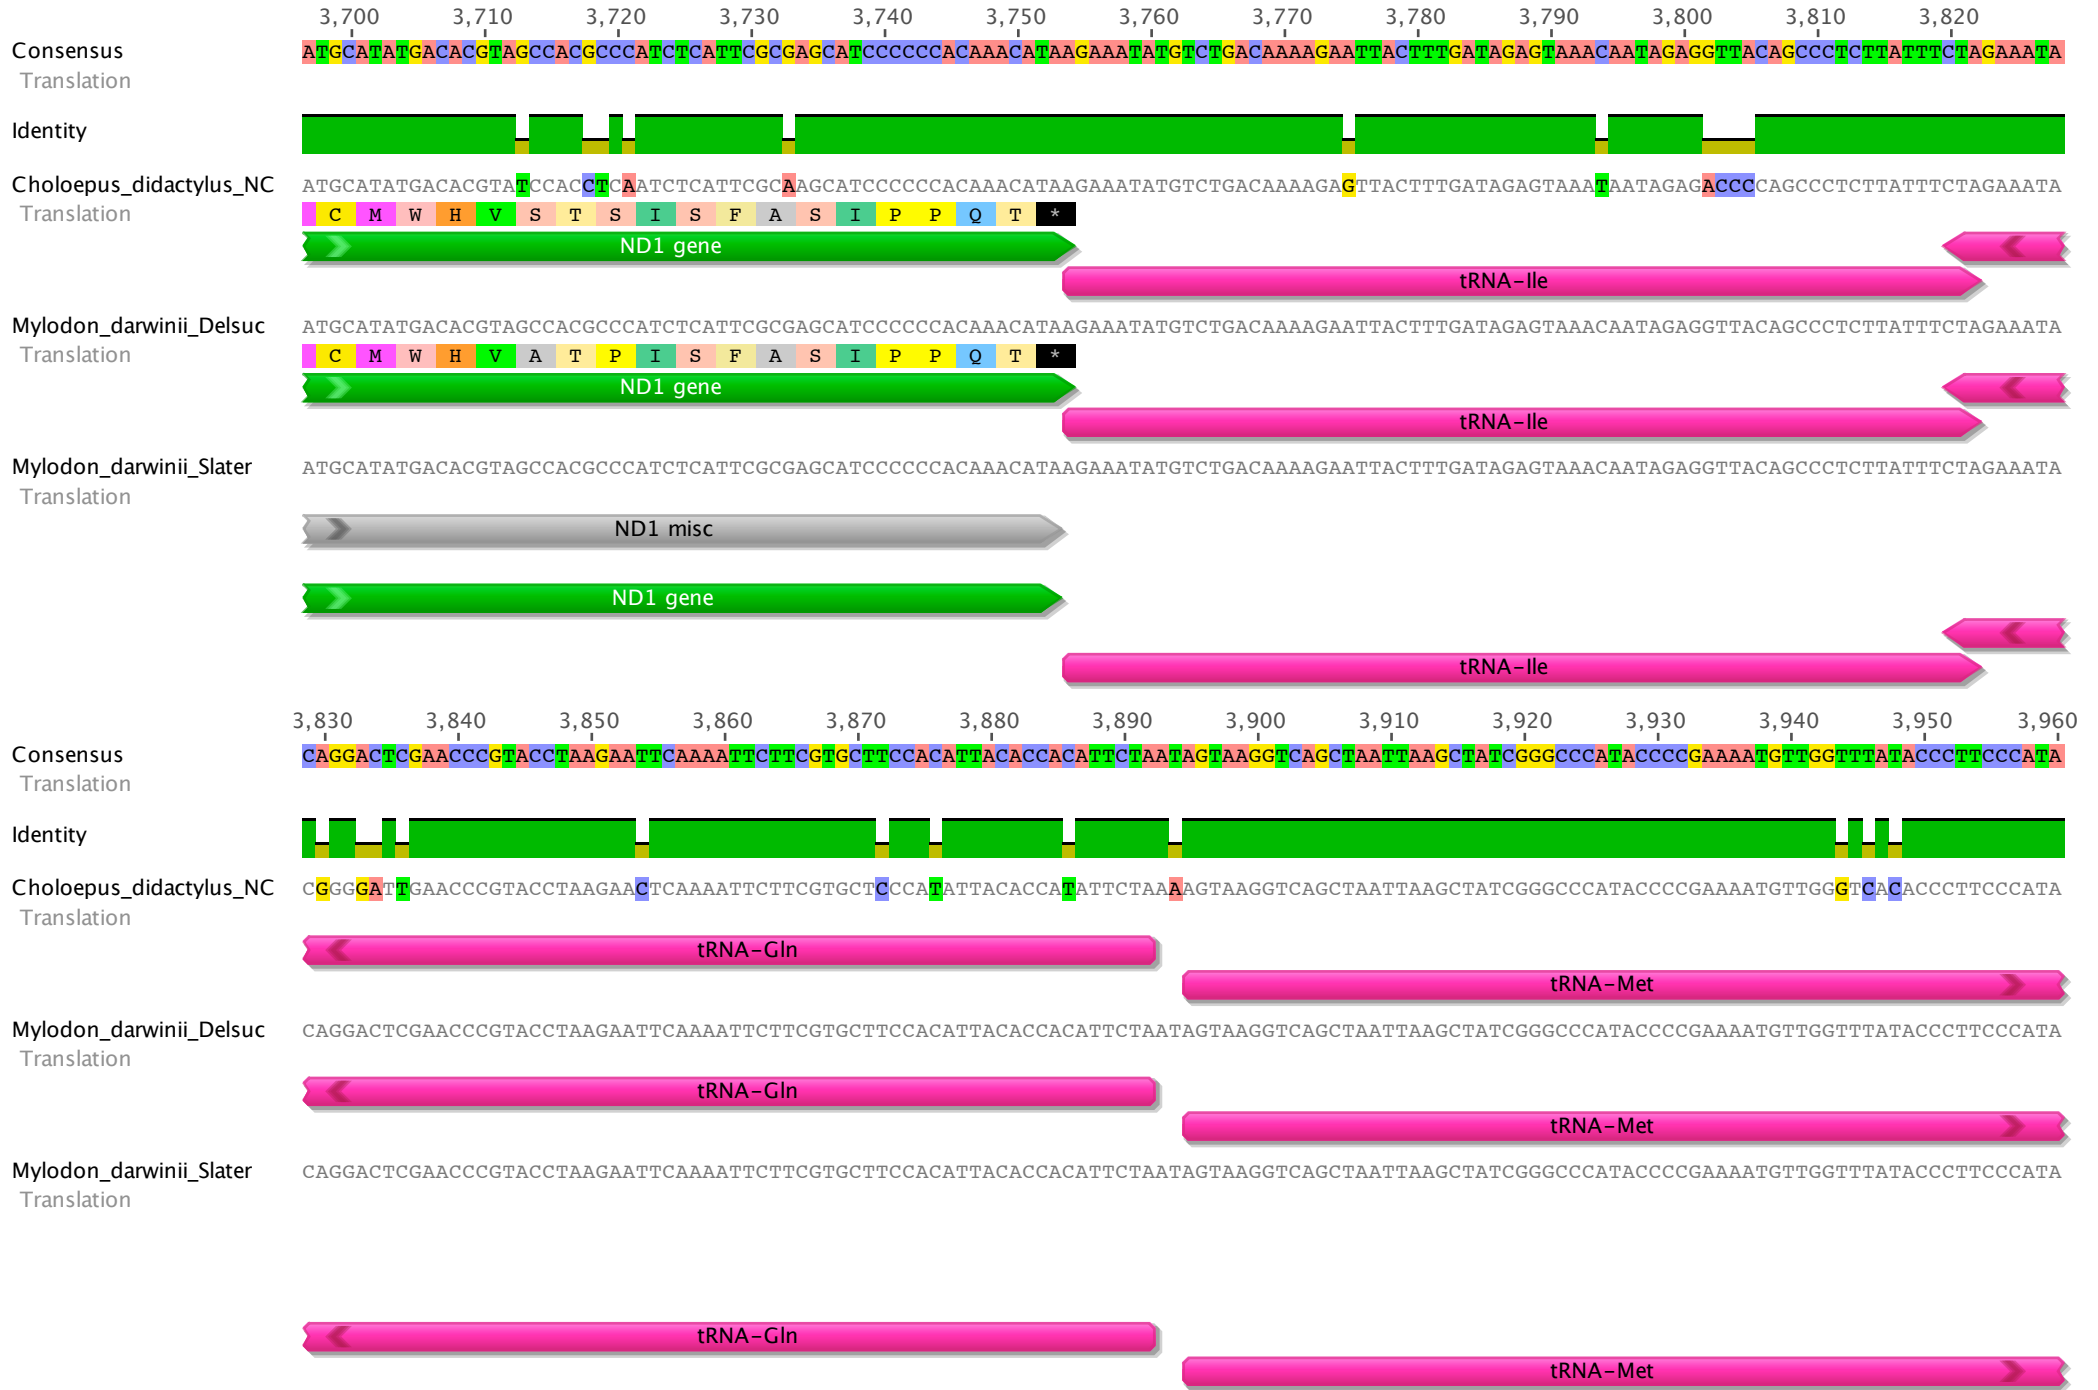

3,970 3,980 3,990 4,000 4,010 4,020 4,030 4,040 4,050 4,060 4,070 4,080 4,090

Consensus  
Translation

Identity

Choloepus\_didactylus\_NC  
Translation

Myiodon\_darwinii\_Delsuc  
Translation

Myiodon\_darwinii\_Slater  
Translation

4,100 4,110 4,120 4,130 4,140 4,150 4,160 4,170 4,180 4,190 4,200 4,210 4,220

Consensus  
Translation

Identity

Choloepus\_didactylus\_NC  
Translation

Myiodon\_darwinii\_Delsuc  
Translation

Myiodon\_darwinii\_Slater  
Translation

4,230 4,240 4,250 4,260 4,270 4,280 4,290 4,300 4,310 4,320 4,330 4,340 4,350

Consensus  
Translation

Identity

Choloepus\_didactylus\_NC  
Translation

ND2 gene

Myiodon\_darwinii\_Delsuc  
Translation

ND2 gene

Myiodon\_darwinii\_Slater  
Translation

ND2 misc

ND2 gene

4,360 4,370 4,380 4,390 4,400 4,410 4,420 4,430 4,440 4,450 4,460 4,470 4,480

Consensus  
Translation

Identity

Choloepus\_didactylus\_NC  
Translation

ND2 gene

Myiodon\_darwinii\_Delsuc  
Translation

ND2 gene

Myiodon\_darwinii\_Slater  
Translation

ND2 misc

ND2 gene

4,490 4,500 4,510 4,520 4,530 4,540 4,550 4,560 4,570 4,580 4,590 4,600 4,610 4,620

Consensus  
Translation

Identity

Choloepus\_didactylus\_NC  
Translation

ND2 gene

Myiodon\_darwinii\_Delsuc  
Translation

ND2 gene

Myiodon\_darwinii\_Slater  
Translation

ND2 misc

ND2 gene

4,630 4,640 4,650 4,660 4,670 4,680 4,690 4,700 4,710 4,720 4,730 4,740 4,750

Consensus  
Translation

Identity

Choloepus\_didactylus\_NC  
Translation

ND2 gene

Myiodon\_darwinii\_Delsuc  
Translation

ND2 gene

Myiodon\_darwinii\_Slater  
Translation

ND2 misc

ND2 gene

4,760 4,770 4,780 4,790 4,800 4,810 4,820 4,830 4,840 4,850 4,860 4,870 4,880

Consensus  
Translation

Identity

Choloepus\_didactylus\_NC  
Translation

L P K W M I I Q E M T K N N L I V M P T M M A I L A L L N L Y F Y M R L I Y S T S L T L

ND2 gene

Myiodon\_darwini\_Delsuc  
Translation

L P K W M I I Q E M T K N G L I I M P T V M A I L A L L N L Y F Y M R L I Y S T S L T L

ND2 gene

Myiodon\_darwini\_Slater  
Translation

ND2 misc

ND2 gene

4,890 4,900 4,910 4,920 4,930 4,940 4,950 4,960 4,970 4,980 4,990 5,000 5,010

Consensus  
Translation

Identity

Choloepus\_didactylus\_NC  
Translation

F P T T N N T K I K W Q F K P T T P P P L T P T L I I L S T T I I P L S P M L C I L E \*

ND2 gene

Myiodon\_darwini\_Delsuc  
Translation

F P S T N N T K I K W Q F K S T T P S P I T P T L I A L S T M I I P L S P M L C T L E \*

ND2 gene

Myiodon\_darwini\_Slater  
Translation

ND2 misc

ND2 gene

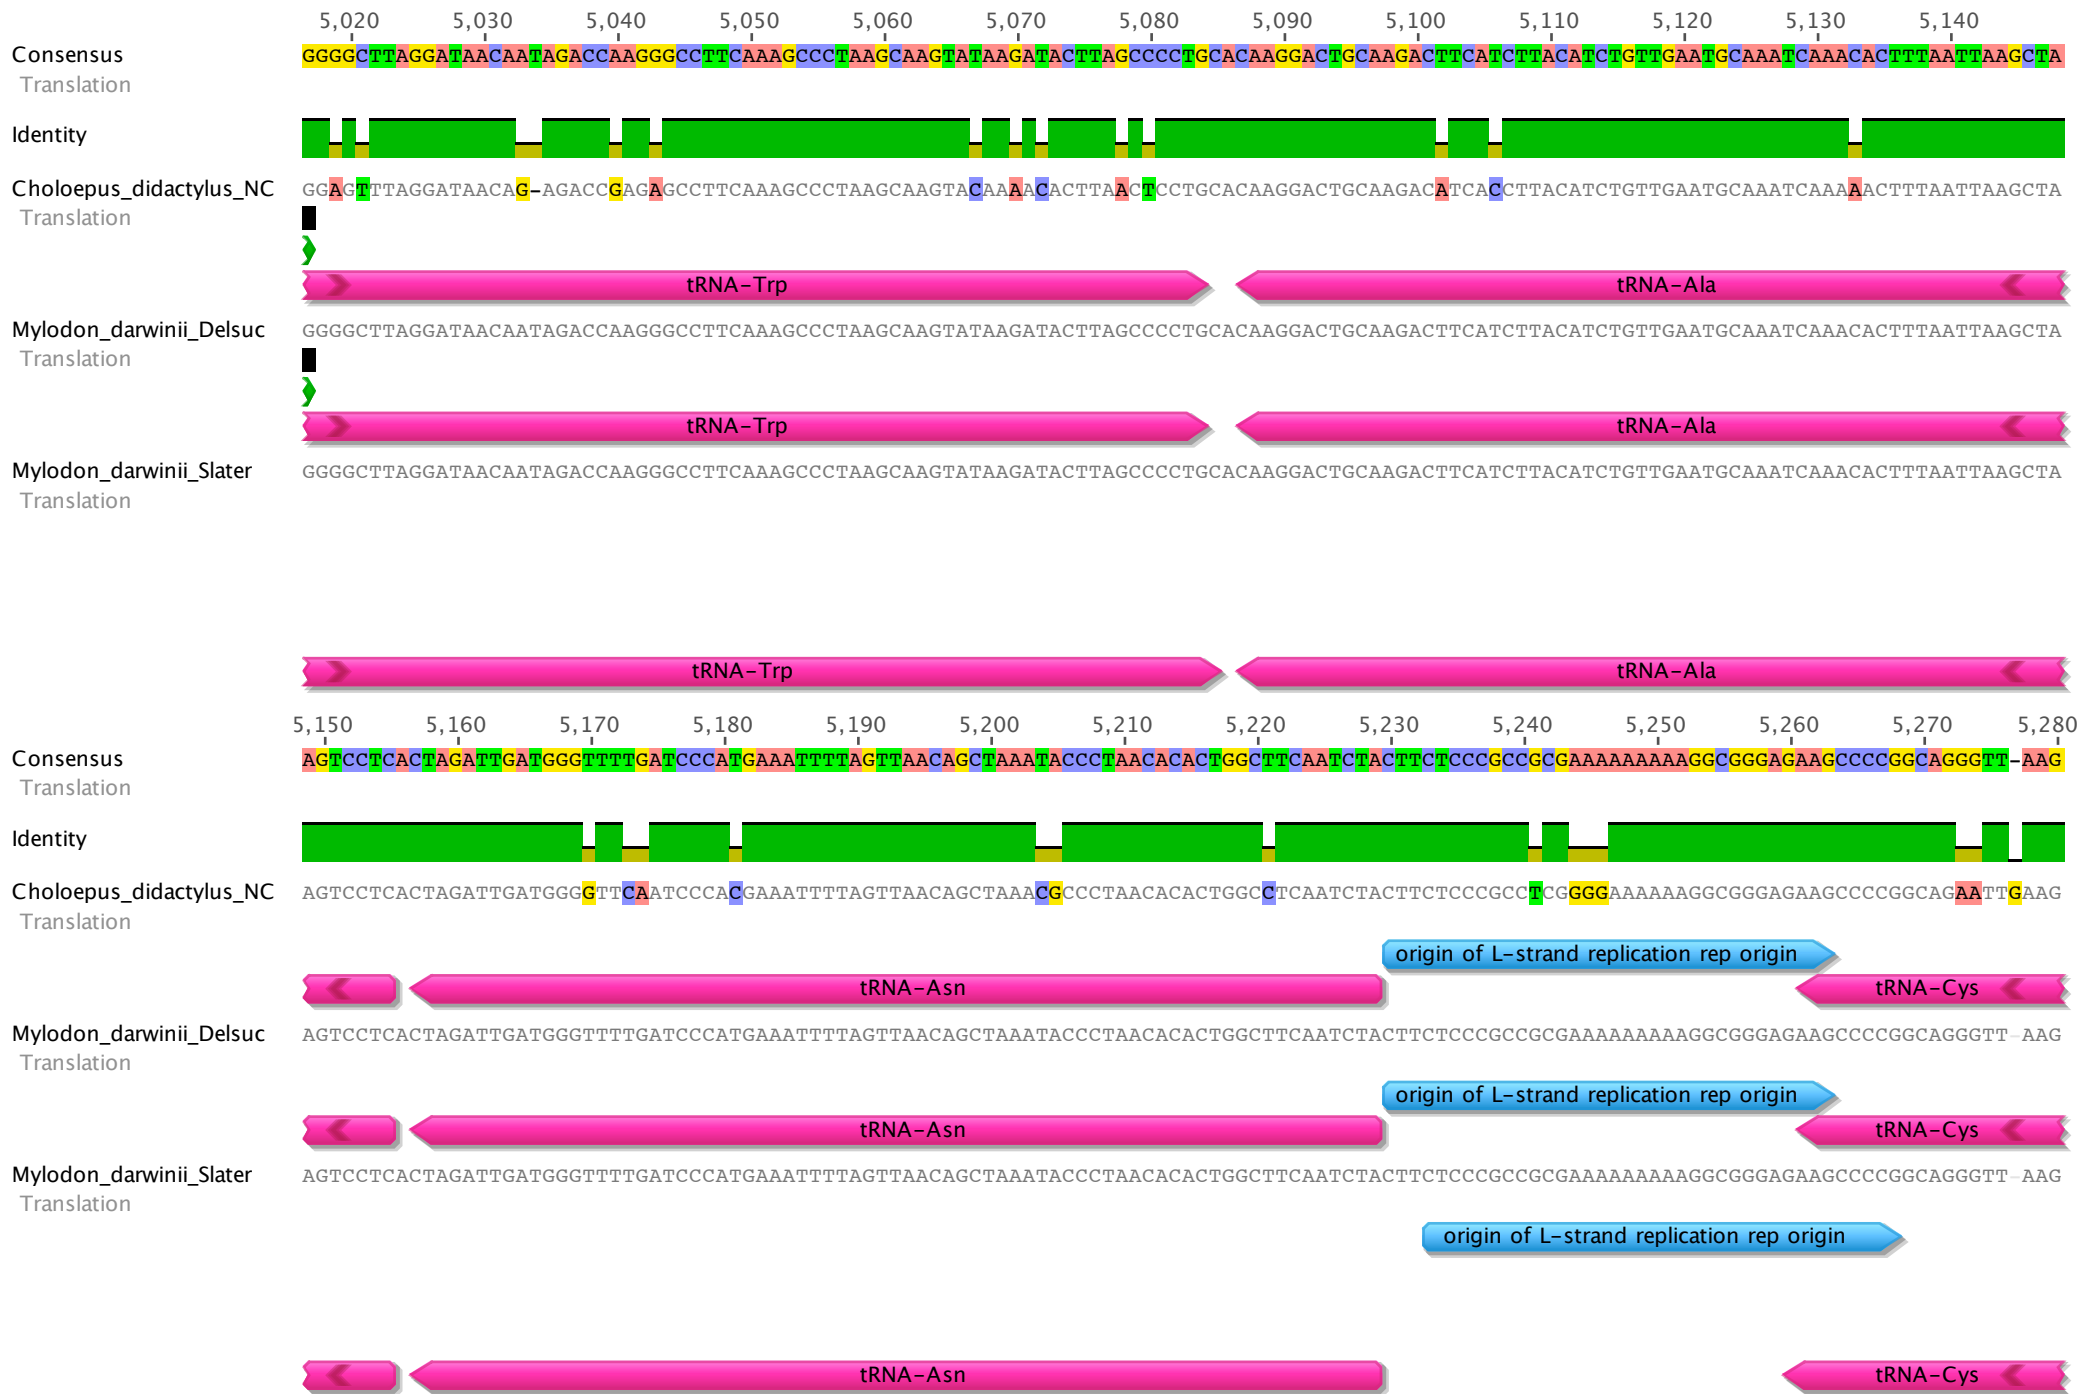

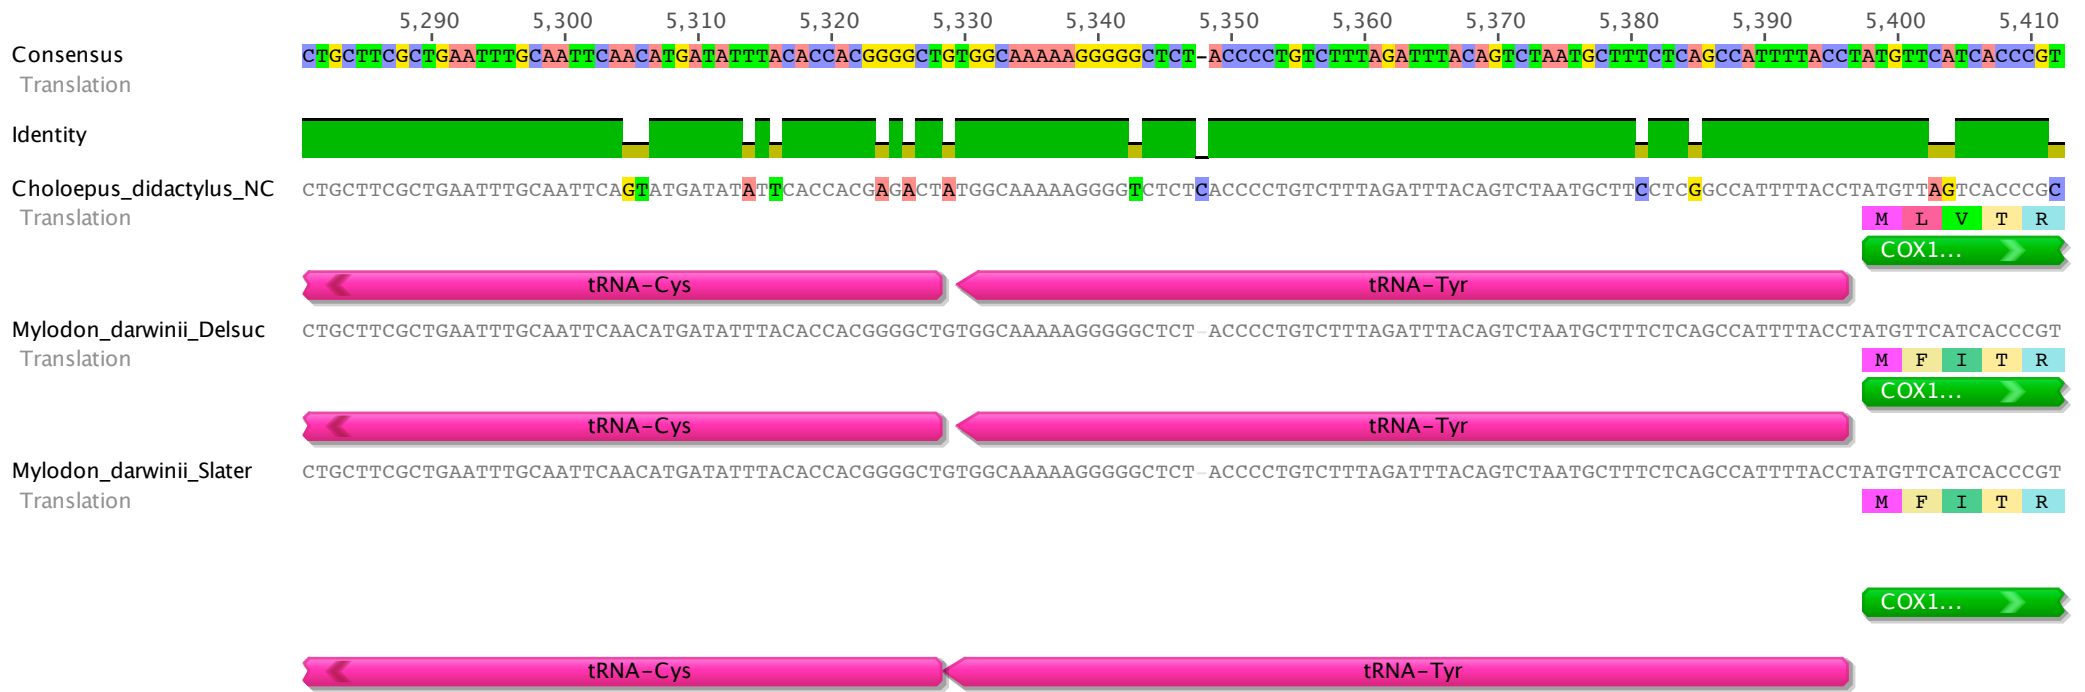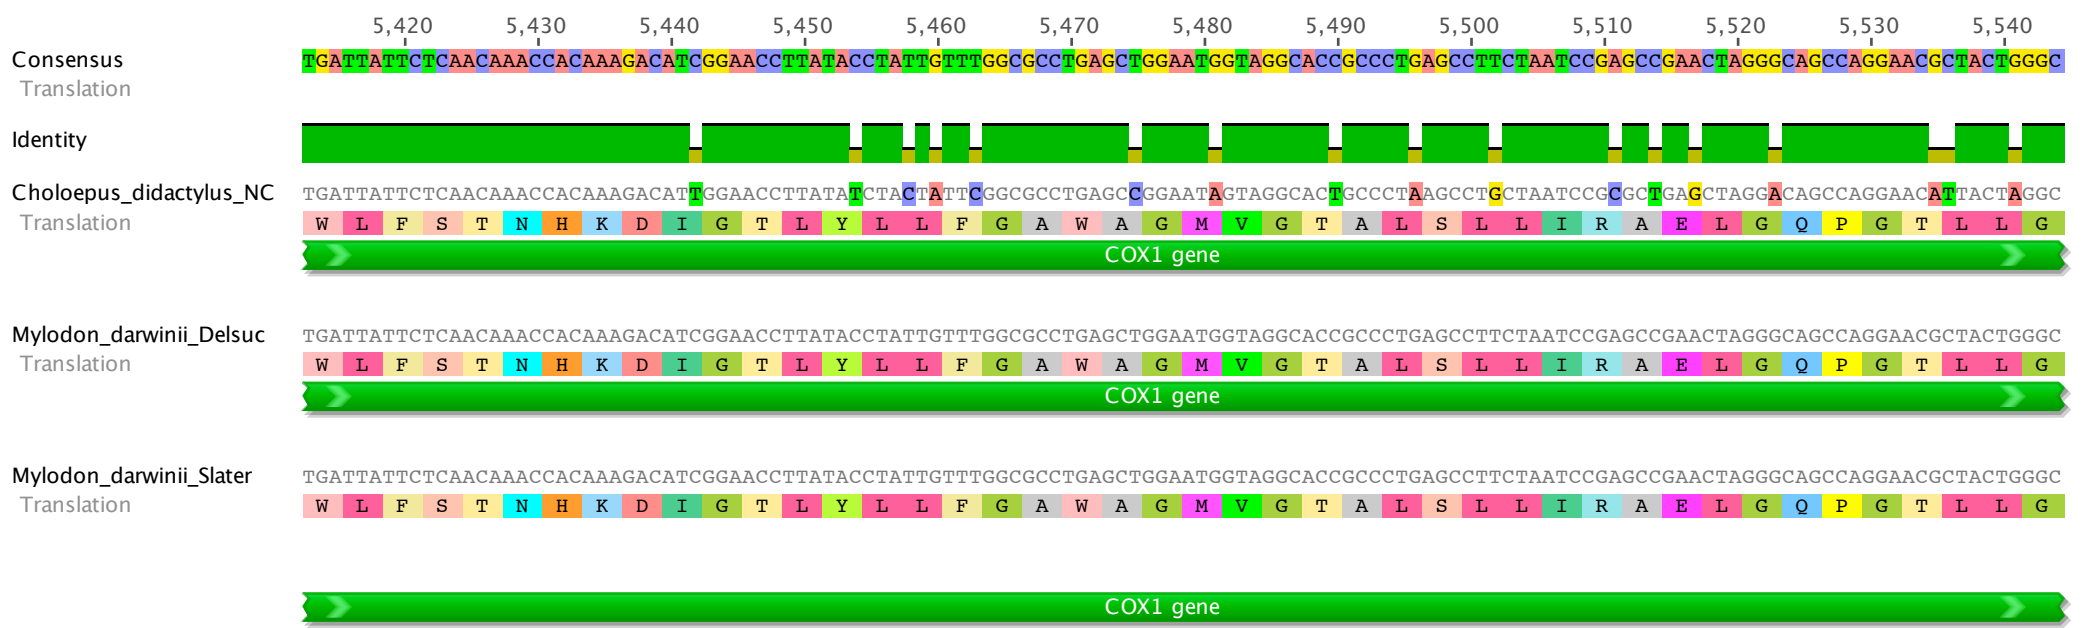

5,550 5,560 5,570 5,580 5,590 5,600 5,610 5,620 5,630 5,640 5,650 5,660 5,670

Consensus  
Translation

Identity

Choloepus\_didactylus\_NC  
Translation

D D Q I Y N V I V T A H A F V M I F F M V M P I M I G G F G N W L V P L M I G A P D M A

COX1 gene

Myiodon\_darwinii\_Delsuc  
Translation

D D Q I Y N V I V T A H A F V M I F F M V M P I M I G G F G N W L V P L M I G A P D M A

COX1 gene

Myiodon\_darwinii\_Slater  
Translation

D D Q I Y N V I V T A H A F V M I F F M V M P I M I G G F G N W L V P L M I G A P N M A

COX1 gene

5,680 5,690 5,700 5,710 5,720 5,730 5,740 5,750 5,760 5,770 5,780 5,790 5,800

Consensus  
Translation

Identity

Choloepus\_didactylus\_NC  
Translation

F P R M N N M S F W L L P P S F L L L L A S S M V E A G A G T G W T V Y P P L A G N L A

COX1 gene

Myiodon\_darwinii\_Delsuc  
Translation

F P R M N N M S F W L L P P S F L L L L A S S M V E A G A G T G W T V Y P P L A G N L A

COX1 gene

Myiodon\_darwinii\_Slater  
Translation

F P R M N N M S F W L L P P S F L L L L A S S M V E A G A G T G W T V Y P P L A G N L A

COX1 gene



5,810 5,820 5,830 5,840 5,850 5,860 5,870 5,880 5,890 5,900 5,910 5,920 5,930 5,940

Consensus  
Translation

Identity

Choloepus\_didactylus\_NC  
Translation

COX1 gene

Myiodon\_darwinii\_Delsuc  
Translation

COX1 gene

Myiodon\_darwinii\_Slater  
Translation

COX1 gene

5,950 5,960 5,970 5,980 5,990 6,000 6,010 6,020 6,030 6,040 6,050 6,060 6,070

Consensus  
Translation

Identity

Choloepus\_didactylus\_NC  
Translation

COX1 gene

Myiodon\_darwinii\_Delsuc  
Translation

COX1 gene

Myiodon\_darwinii\_Slater  
Translation

COX1 gene

6,080 6,090 6,100 6,110 6,120 6,130 6,140 6,150 6,160 6,170 6,180 6,190 6,200

Consensus  
Translation

Identity

Choloepus\_didactylus\_NC  
Translation

GGTGACCCCATCCTATAACCAACATCTATTCTGATTCTTCGGACACCCCTGAGGTCTACATTCTTATCCTCCCAGGCTTCGGCATGATTTCTCACATTGTACATATTACTCTGGAAAAAAGGAACCATTTCGGC

G D P I L Y Q H L F W F F G H P E V Y I L I L P G F G M I S H I V T Y Y S G K K E P F G

COX1 gene

Myiodon\_darwinii\_Delsuc  
Translation

GGTGACCCCATCCTATAACCAACATCTATTCTGATTCTTCGGACACCCCTGAGGTCTACATTCTTATCCTCCCAGGCTTCGGCATGATTTCTCACATTGTACATATTACTCTGGAAAAAAGGAACCATTTCGGC

G D P I L Y Q H L F W F F G H P E V Y I L I L P G F G M I S H I V T Y Y S G K K E P F G

COX1 gene

Myiodon\_darwinii\_Slater  
Translation

GGTGACCCCATCCTATAACCAACATCTATTCTGATTCTTCGGACACCCCTGAGGTCTACATTCTTATCCTCCCAGGCTTCGGCATGATTTCTCACATTGTACATATTACTCTGGAAAAAAGGAACCATTTCGGC

G D P I L Y Q H L F W F F G H P E V Y I L I L P G F G M I S H I V T Y Y S G K K E P F G

COX1 gene

6,210 6,220 6,230 6,240 6,250 6,260 6,270 6,280 6,290 6,300 6,310 6,320 6,330

Consensus  
Translation

Identity

Choloepus\_didactylus\_NC  
Translation

TATATGGGTATAGTAGTGAGCTATAAATGTCGATTGGATTTCCTAGGGTTCATTGTCTGAGCTCACCACATGTTACAGTAGGAATGGACGTGGACACACGAGCATACTTCACATCAGCGACCATAATTATTGCT

Y M G M V W A M M S I G F L G F I V W A H H M F T V G M D V D T R A Y F T S A T M I I A

COX1 gene

Myiodon\_darwinii\_Delsuc  
Translation

TACATAGGGATAGTGTGAGCTATAAATGTCGATTGGATTTCCTAGGGTTCATTGTCTGAGCTCACCACATGTTACAGTAGGAATGGACGTGGACACACGAGCATACTTCACATCAGCGACCATAATTATTGCT

Y M G M V W A M M S I G F L G F I V W A H H M F T V G M D V D T R A Y F T S A T M I I A

COX1 gene

Myiodon\_darwinii\_Slater  
Translation

TACATAGGGATAGTGTGAGCTATAAATGTCGATTGGATTTCCTAGGGTTCATTGTCTGAGCTCACCACATGTTACAGTAGGAATGGACGTGGACACACGAGCATACTTCACATCAGCGACCATAATTATTGCT

Y M G M V W A M M S I G F L G F I V W A H H M F T V G M D V D T R A Y F T S A T M I I A

COX1 gene





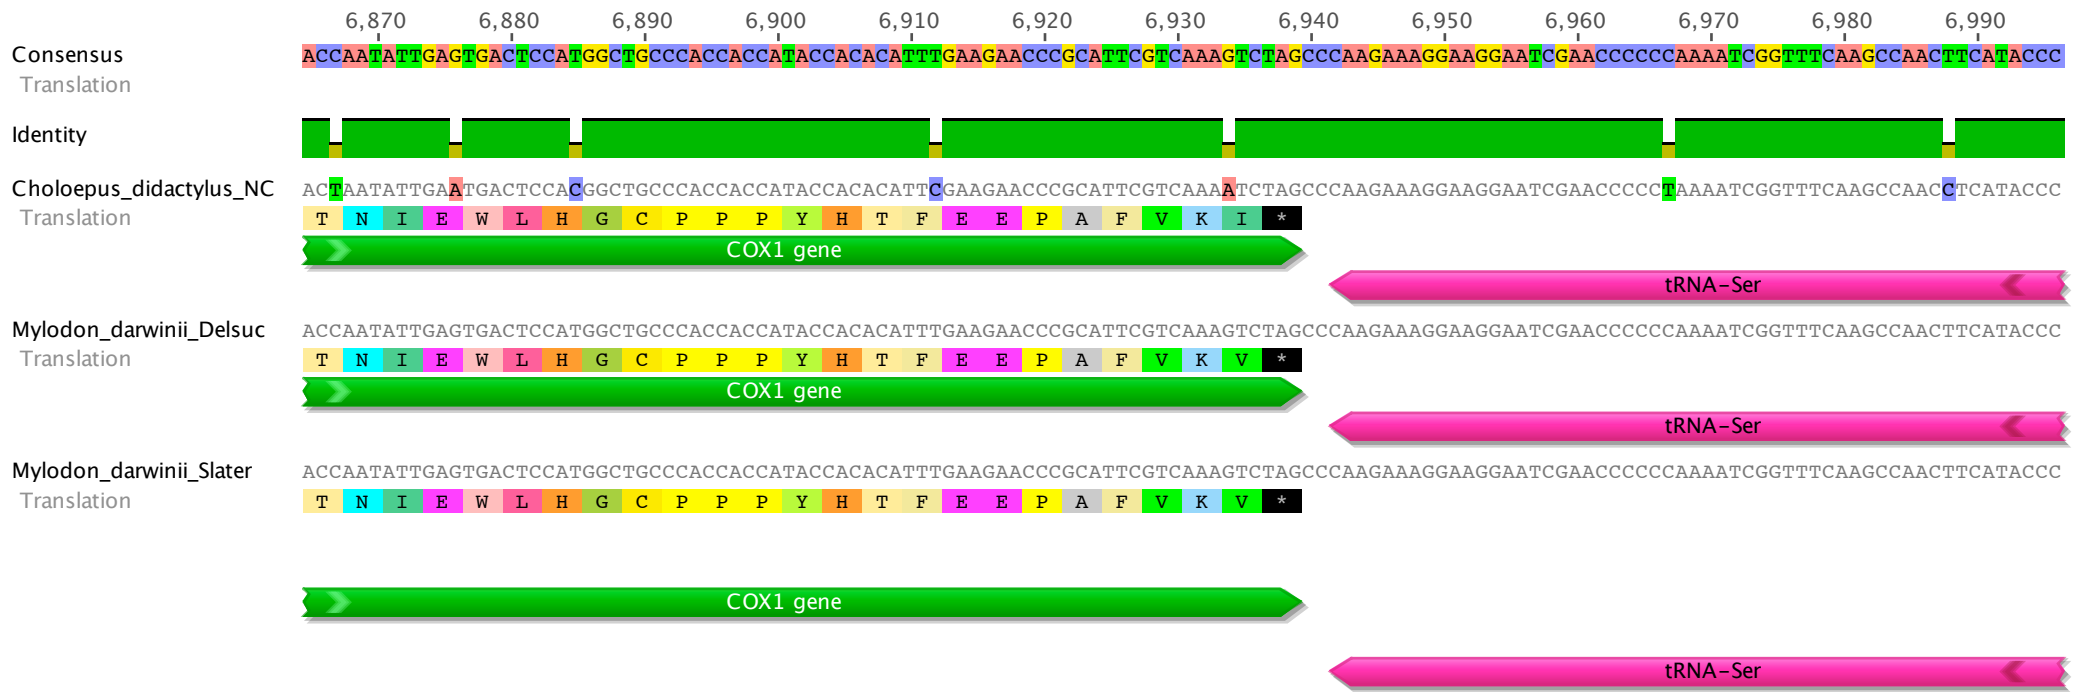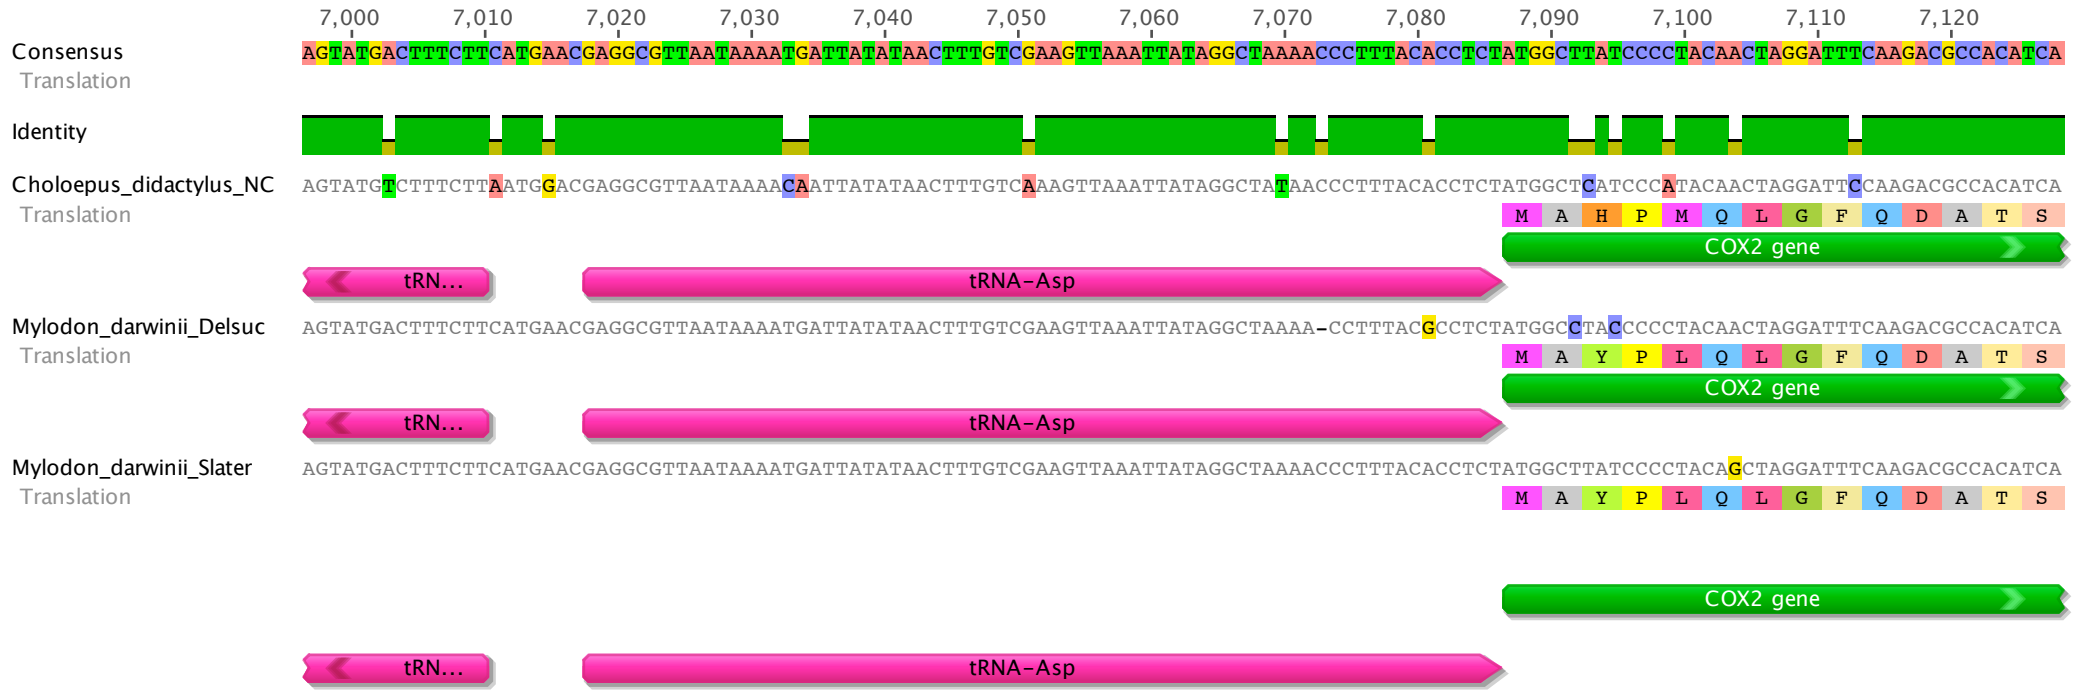

7,130 7,140 7,150 7,160 7,170 7,180 7,190 7,200 7,210 7,220 7,230 7,240 7,250 7,260

Consensus  
Translation

Identity

Choloepus\_didactylus\_NC  
Translation

COX2 gene

Myiodon\_darwinii\_Delsuc  
Translation

COX2 gene

Myiodon\_darwinii\_Slater  
Translation

COX2 gene

7,270 7,280 7,290 7,300 7,310 7,320 7,330 7,340 7,350 7,360 7,370 7,380 7,390

Consensus  
Translation

Identity

Choloepus\_didactylus\_NC  
Translation

COX2 gene

Myiodon\_darwinii\_Delsuc  
Translation

COX2 gene

Myiodon\_darwinii\_Slater  
Translation

COX2 gene

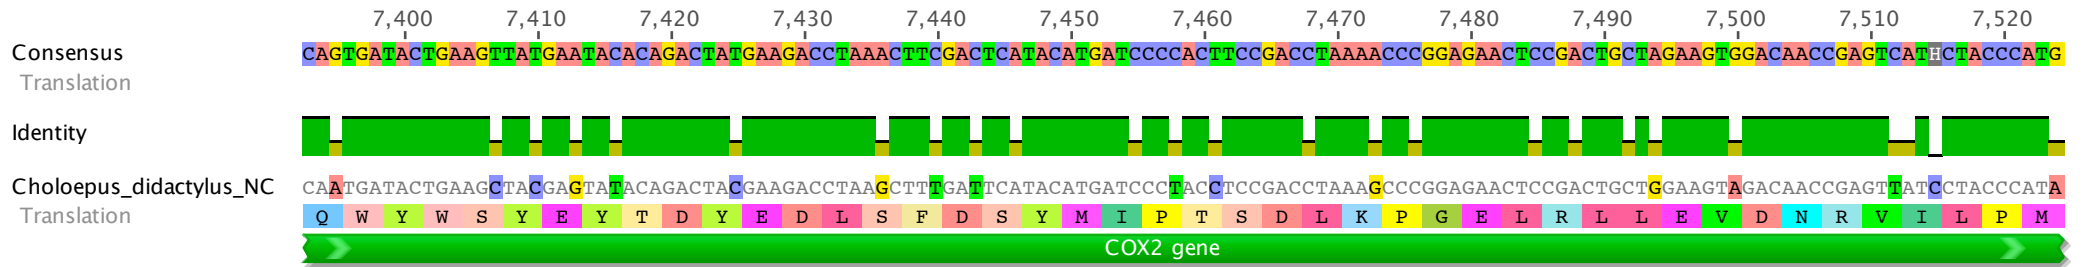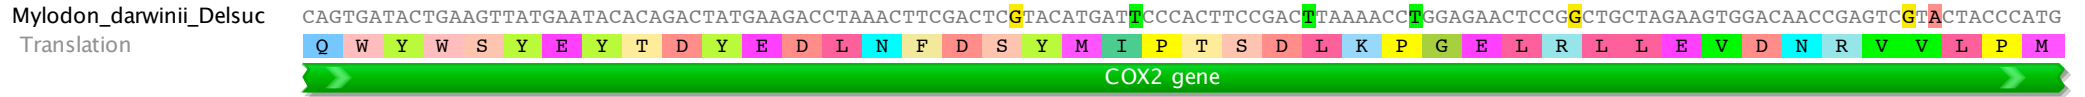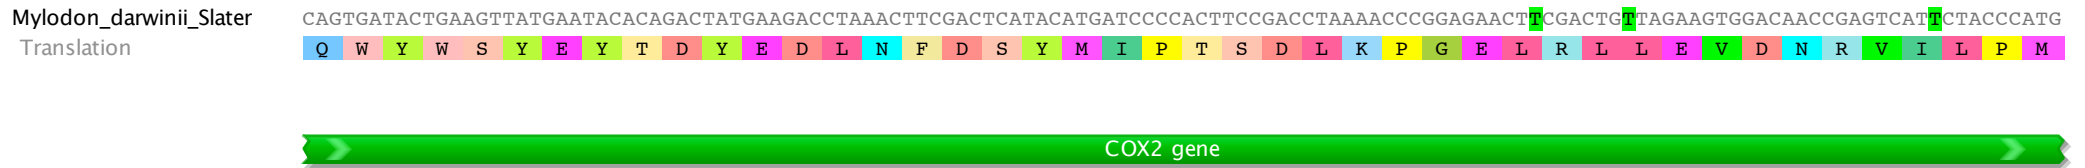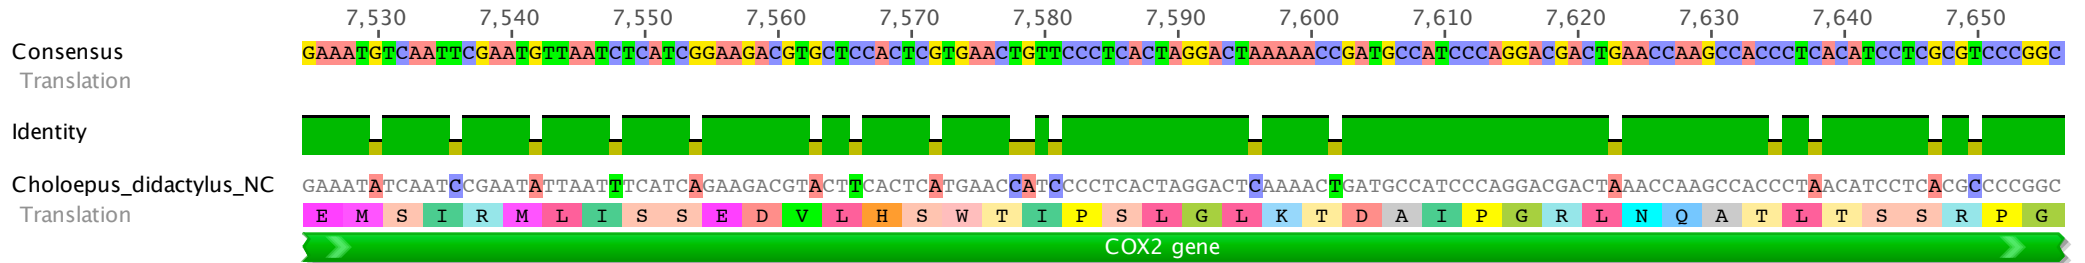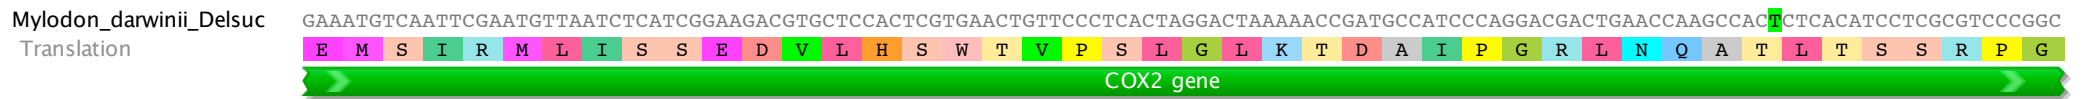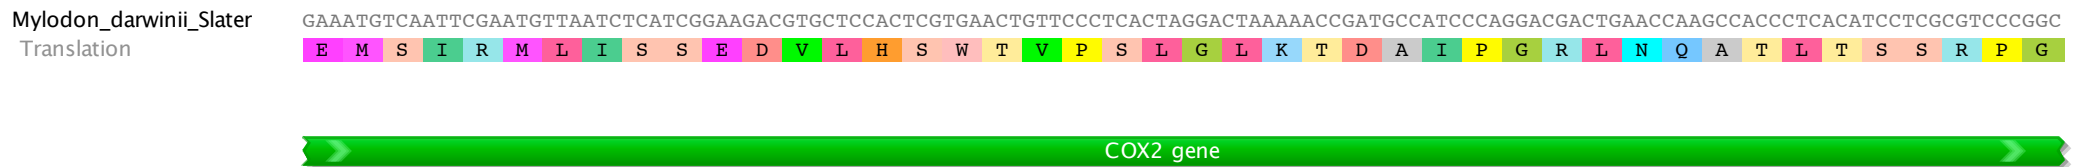

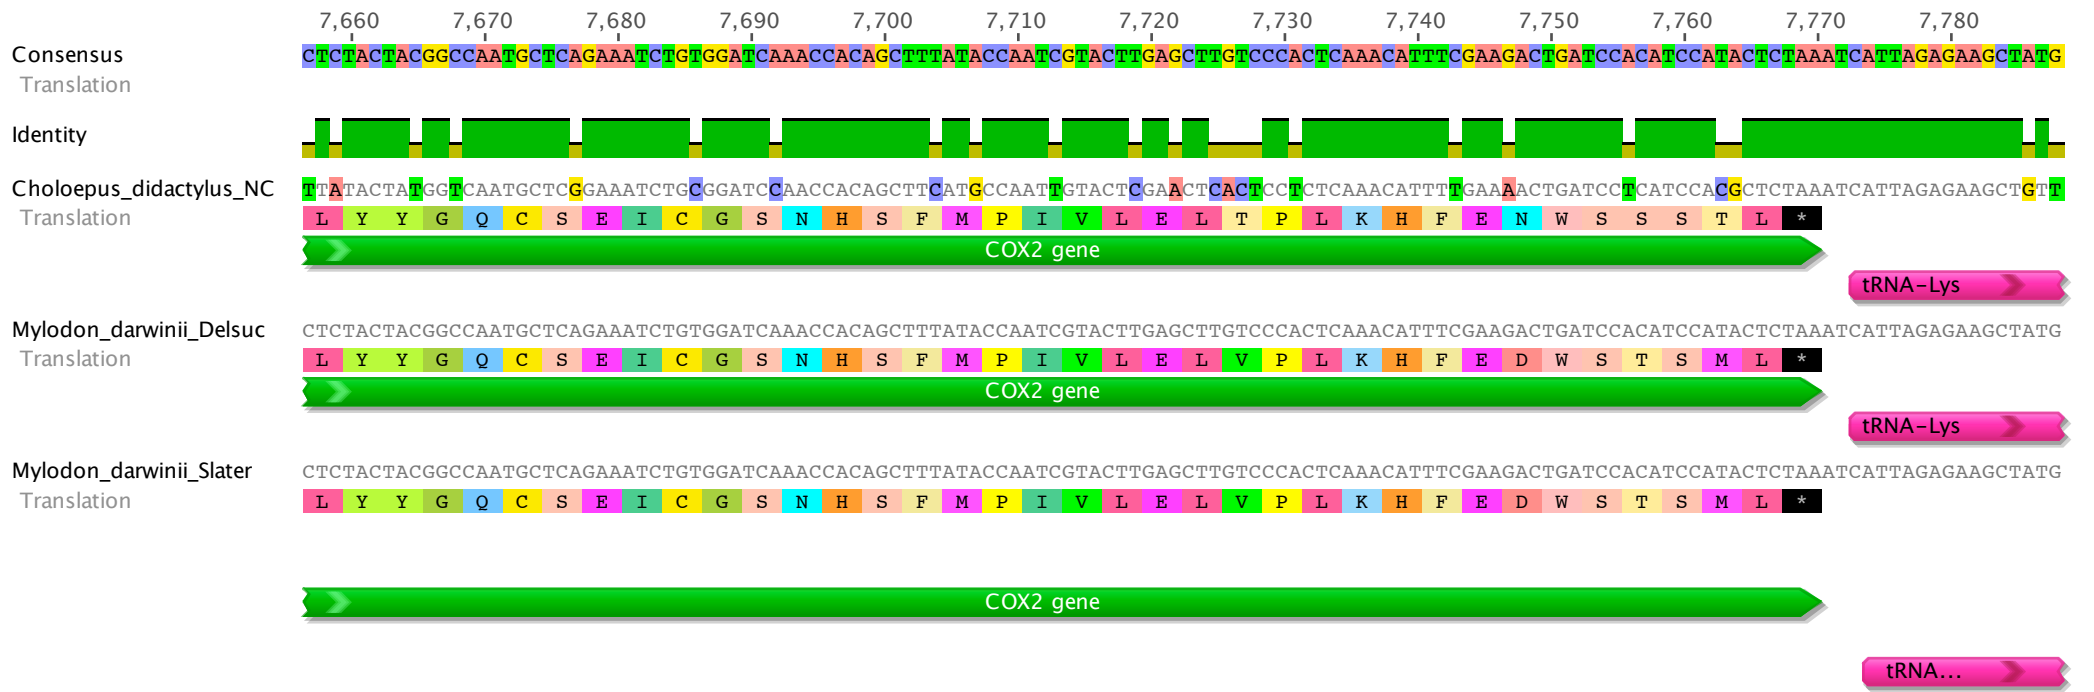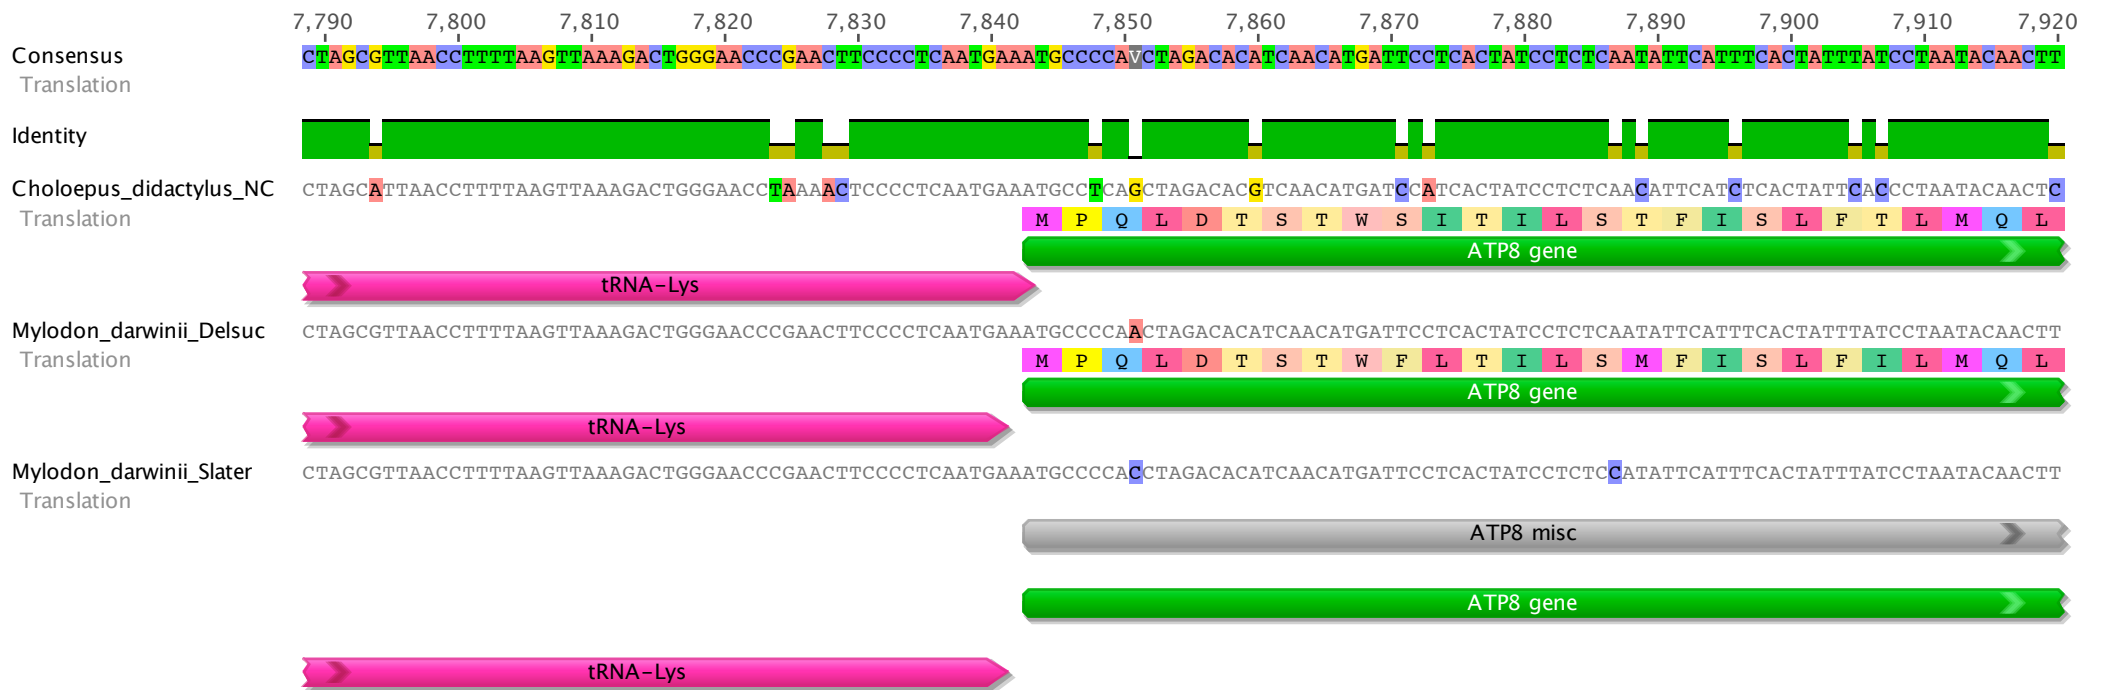



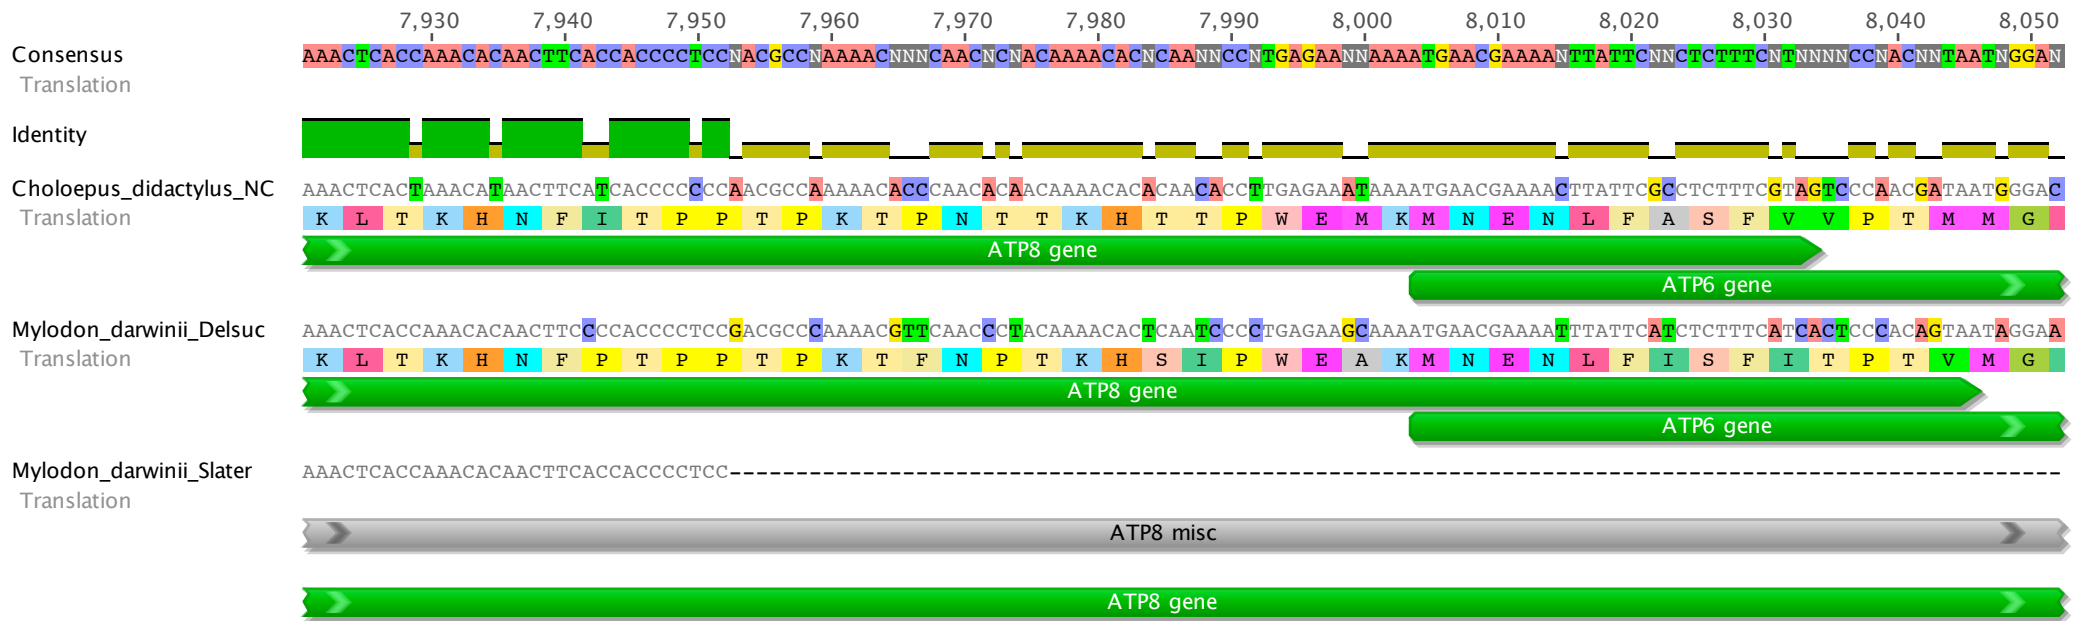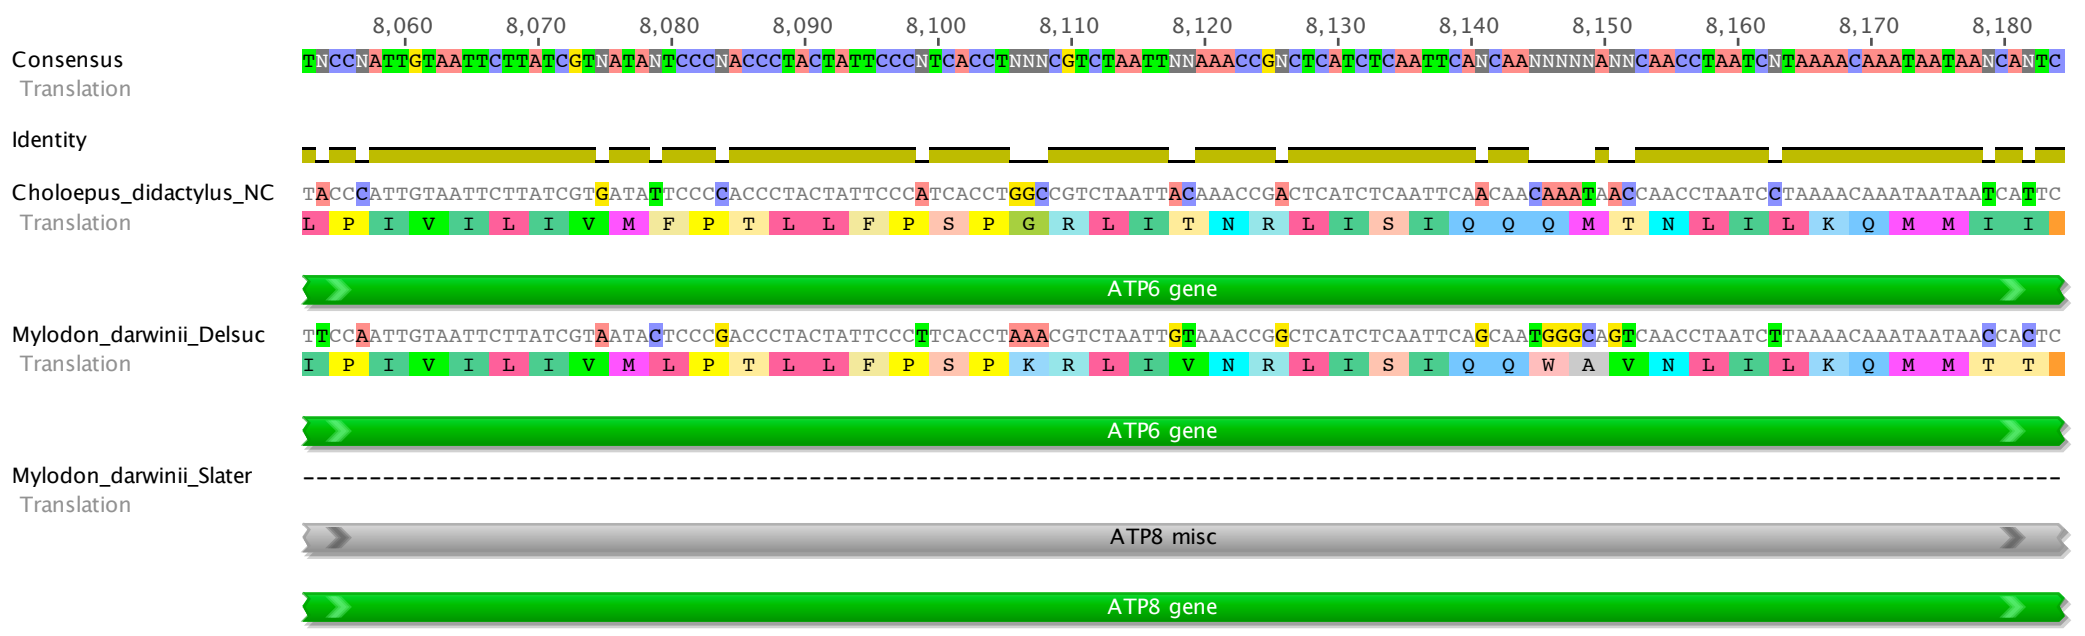

8,190 8,200 8,210 8,220 8,230 8,240 8,250 8,260 8,270 8,280 8,290 8,300 8,310

Consensus  
Translation

Identity

Choloepus\_didactylus\_NC  
Translation

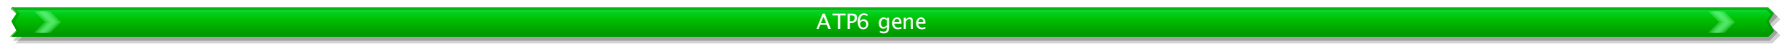

Myiodon\_darwinii\_Delsuc  
Translation

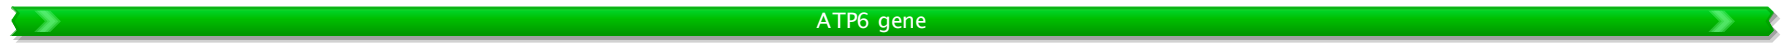

Myiodon\_darwinii\_Slater  
Translation

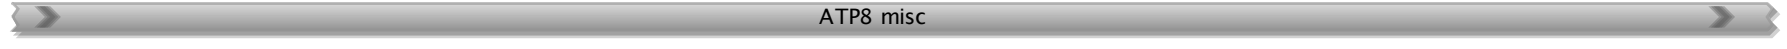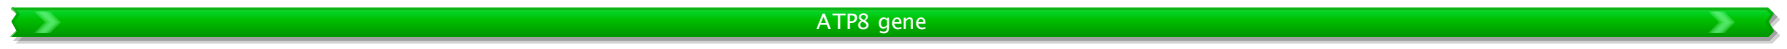

8,320 8,330 8,340 8,350 8,360 8,370 8,380 8,390 8,400 8,410 8,420 8,430 8,440

Consensus  
Translation

Identity

Choloepus\_didactylus\_NC  
Translation

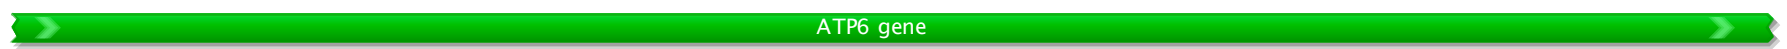

Myiodon\_darwinii\_Delsuc  
Translation

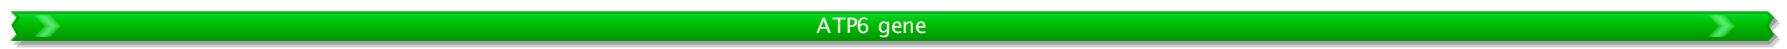

Myiodon\_darwinii\_Slater  
Translation

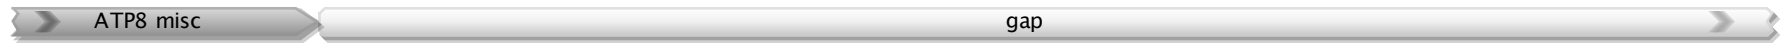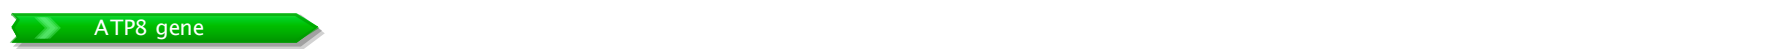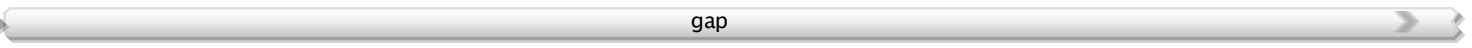

8,450 8,460 8,470 8,480 8,490 8,500 8,510 8,520 8,530 8,540 8,550 8,560 8,570 8,580

Consensus  
Translation

Identity

Choloepus\_didactylus\_NC  
Translation

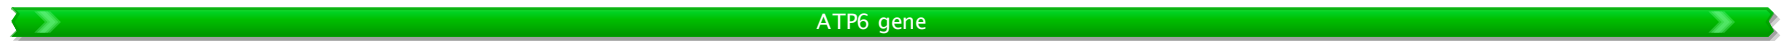

Myiodon\_darwinii\_Delsuc  
Translation

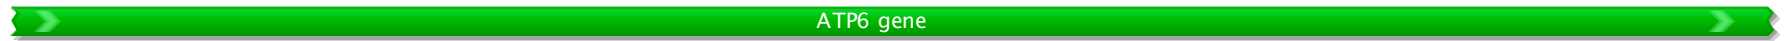

Myiodon\_darwinii\_Slater  
Translation

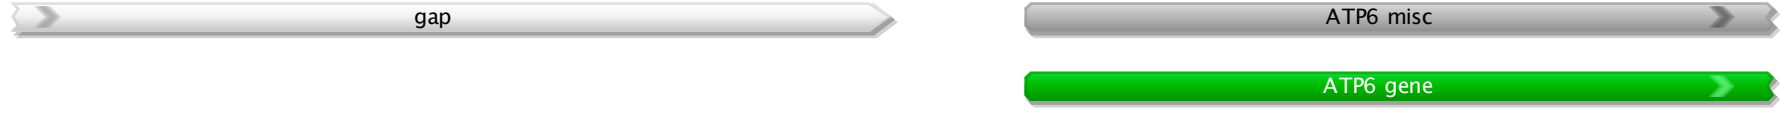

8,590 8,600 8,610 8,620 8,630 8,640 8,650 8,660 8,670 8,680 8,690 8,700 8,710

Consensus  
Translation

Identity

Choloepus\_didactylus\_NC  
Translation

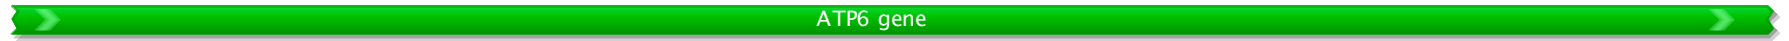

Myiodon\_darwinii\_Delsuc  
Translation

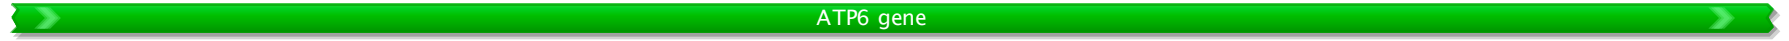

Myiodon\_darwinii\_Slater  
Translation

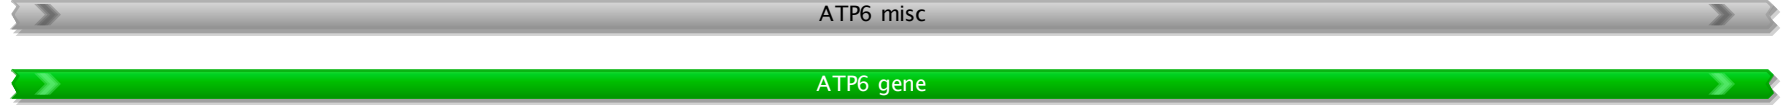

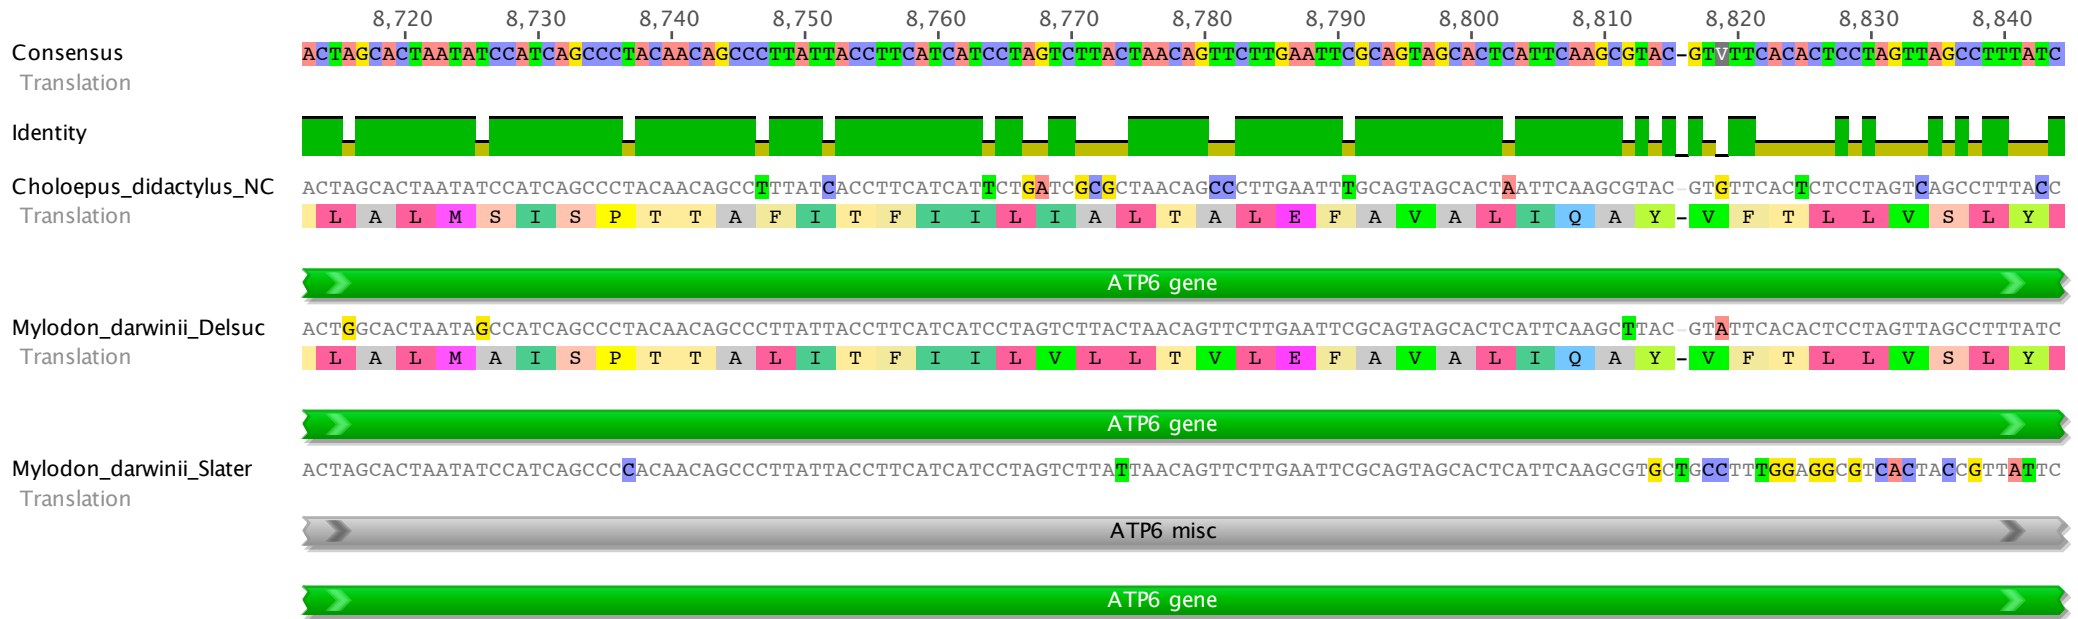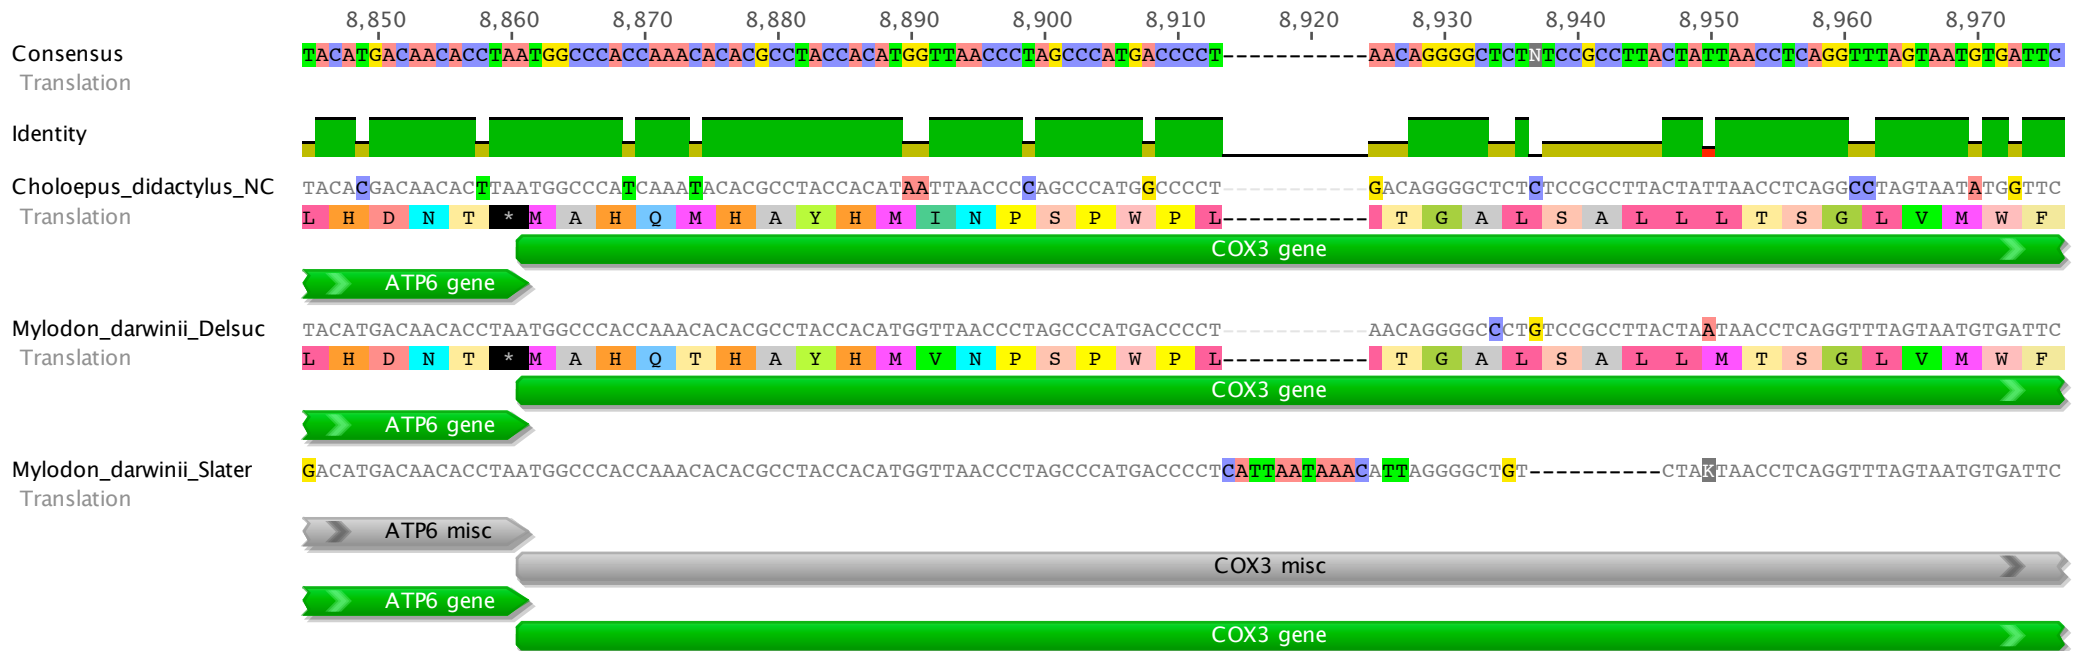

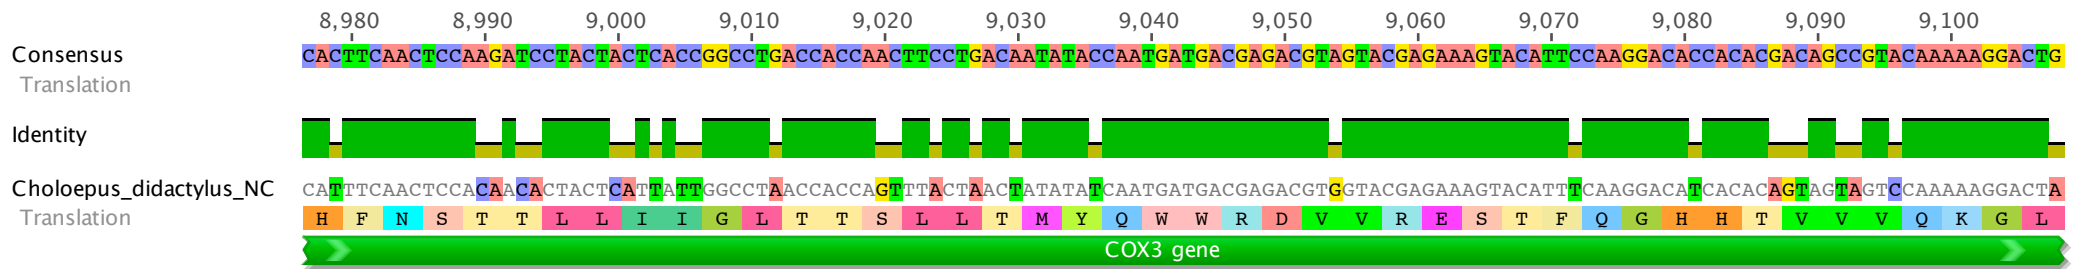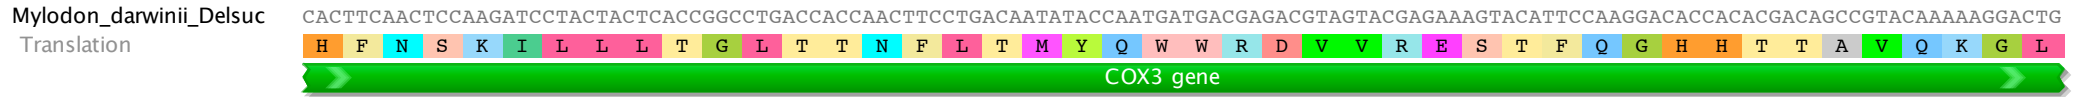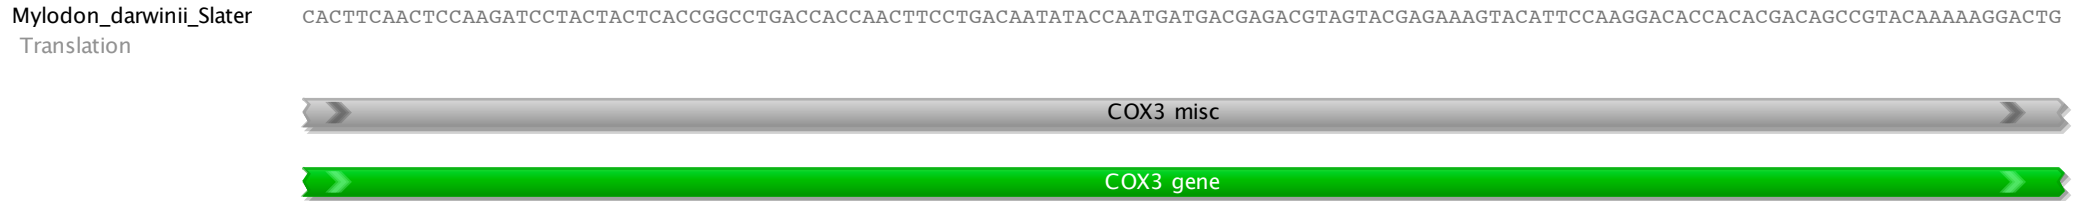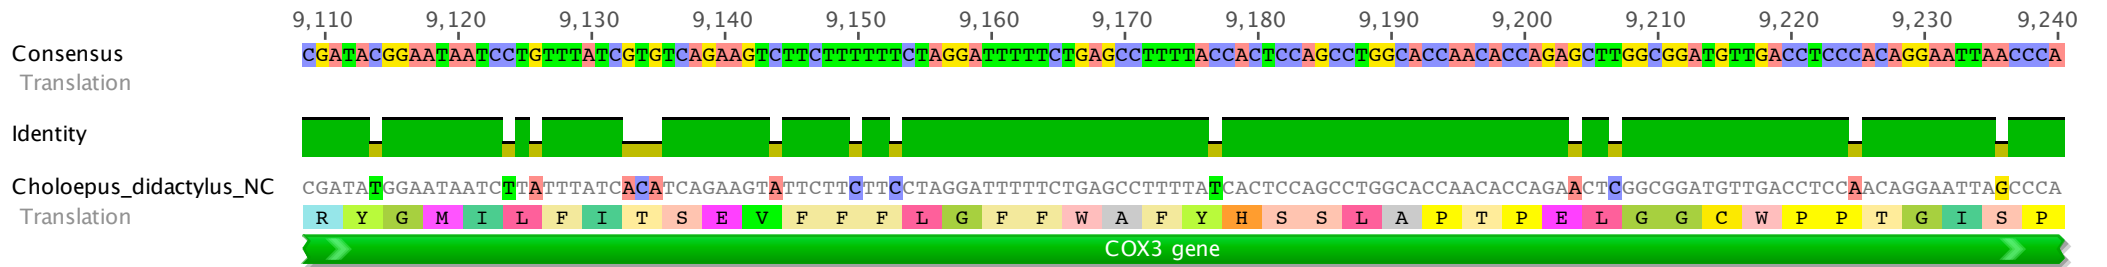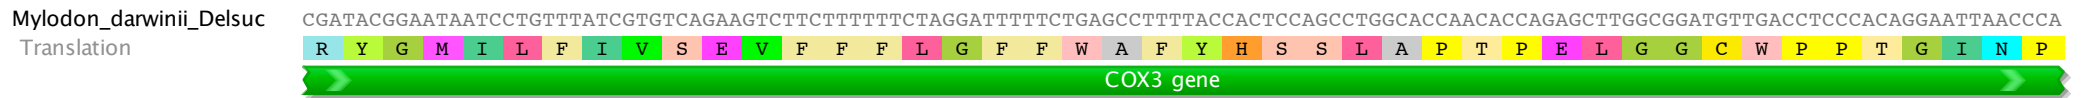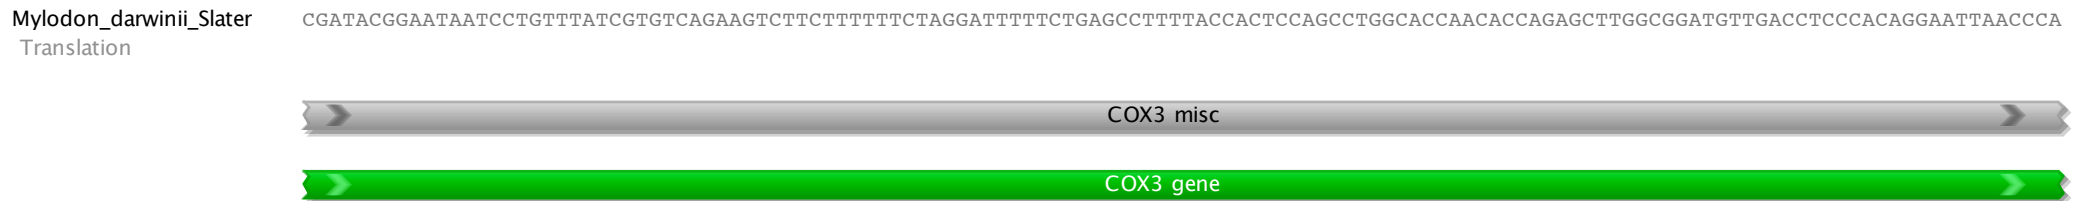

9,250 9,260 9,270 9,280 9,290 9,300 9,310 9,320 9,330 9,340 9,350 9,360 9,370

Consensus  
Translation

Identity

Choloepus\_didactylus\_NC  
Translation

COX3 gene

Myiodon\_darwinii\_Delsuc  
Translation

COX3 gene

Myiodon\_darwinii\_Slater  
Translation

COX3 misc

COX3 gene

9,380 9,390 9,400 9,410 9,420 9,430 9,440 9,450 9,460 9,470 9,480 9,490 9,500

Consensus  
Translation

Identity

Choloepus\_didactylus\_NC  
Translation

COX3 gene

Myiodon\_darwinii\_Delsuc  
Translation

COX3 gene

Myiodon\_darwinii\_Slater  
Translation

COX3 misc

COX3 gene

9,510 9,520 9,530 9,540 9,550 9,560 9,570 9,580 9,590 9,600 9,610 9,620 9,630

Consensus  
Translation

Identity

Choloepus\_didactylus\_NC  
Translation

S S F L I I C F L R Q L K F H F T S N H H F G F E A A A W Y W H F V D V V W L L L Y V S

COX3 gene

Myiodon\_darwinii\_Delsuc  
Translation

S S F L I V C F L R Q L K F H F T S N H H F G F E A A A W Y W H F V D V V W L F L Y V S

COX3 gene

Myiodon\_darwinii\_Slater  
Translation

COX3 misc

COX3 gene

9,640 9,650 9,660 9,670 9,680 9,690 9,700 9,710 9,720 9,730 9,740 9,750 9,760

Consensus  
Translation

Identity

Choloepus\_didactylus\_NC  
Translation

I Y W W G S M N L I L T L L I N S A L A

COX3 gene

tRNA-Gly

ND3 gene

Myiodon\_darwinii\_Delsuc  
Translation

I Y W W G S M N L I L S L L I N S T L A

COX3 gene

tRNA-Gly

ND3 gene

Myiodon\_darwinii\_Slater  
Translation

M N L I L S L L I N S T L A

COX3 misc

COX3 gene

tRNA-Gly

ND3 gene

9,770 9,780 9,790 9,800 9,810 9,820 9,830 9,840 9,850 9,860 9,870 9,880 9,890 9,900

Consensus  
 Translation

Identity

Choloepus\_didactylus\_NC  
 Translation

ND3 gene

Myiodon\_darwinii\_Delsuc  
 Translation

ND3 gene

Myiodon\_darwinii\_Slater  
 Translation

gap

ND3 gene

9,910 9,920 9,930 9,940 9,950 9,960 9,970 9,980 9,990 10,000 10,010 10,020 10,030

Consensus  
 Translation

Identity

Choloepus\_didactylus\_NC  
 Translation

ND3 gene

Myiodon\_darwinii\_Delsuc  
 Translation

ND3 gene

Myiodon\_darwinii\_Slater  
 Translation

gap



10,040 10,050 10,060 10,070 10,080 10,090 10,100 10,110 10,120 10,130 10,140 10,150 10,160

Consensus  
Translation

Identity

Choloepus\_didactylus\_NC  
Translation

Myiodon\_darwinii\_Delsuc  
Translation

Myiodon\_darwinii\_Slater  
Translation

10,170 10,180 10,190 10,200 10,210 10,220 10,230 10,240 10,250 10,260 10,270 10,280 10,290

Consensus  
Translation

Identity

Choloepus\_didactylus\_NC  
Translation

Myiodon\_darwinii\_Delsuc  
Translation

Myiodon\_darwinii\_Slater  
Translation

10,300 10,310 10,320 10,330 10,340 10,350 10,360 10,370 10,380 10,390 10,400 10,410 10,420

Consensus  
Translation

Identity

Choloepus\_didactylus\_NC  
Translation

ND4L gene

Myiodon\_darwinii\_Delsuc  
Translation

ND4L gene

Myiodon\_darwinii\_Slater  
Translation

10,430 10,440 10,450 10,460 10,470 10,480 10,490 10,500 10,510 10,520 10,530 10,540 10,550 10,560

Consensus  
Translation

Identity

Choloepus\_didactylus\_NC  
Translation

N...

ND4 gene

Myiodon\_darwinii\_Delsuc  
Translation

N...

ND4 gene

Myiodon\_darwinii\_Slater  
Translation

CTACAATGCTAAAAC TTATTATCCACAATTATACTAATTCCCTCACCTGACTATCAAAAAATAGCATAATCTGAATTAAC TCCACGCCACAGCCTCTTCATCAGTTTAATTAGCCTGTCAC TATTCC



10,830 10,840 10,850 10,860 10,870 10,880 10,890 10,900 10,910 10,920 10,930 10,940 10,950

Consensus  
Translation

Identity

Choloepus\_didactylus\_NC  
Translation

Myiodon\_darwinii\_Delsuc  
Translation

Myiodon\_darwinii\_Slater  
Translation

ND4 gene

ND4 gene

ND4 misc

ND4 gene

10,960 10,970 10,980 10,990 11,000 11,010 11,020 11,030 11,040 11,050 11,060 11,070 11,080

Consensus  
Translation

Identity

Choloepus\_didactylus\_NC  
Translation

Myiodon\_darwinii\_Delsuc  
Translation

Myiodon\_darwinii\_Slater  
Translation

ND4 gene

ND4 gene

ND4 misc

ND4 gene

11,090 11,100 11,110 11,120 11,130 11,140 11,150 11,160 11,170 11,180 11,190 11,200 11,210 11,220

Consensus  
Translation

Identity

Choloepus\_didactylus\_NC  
Translation

Myiodon\_darwinii\_Delsuc  
Translation

Myiodon\_darwinii\_Slater  
Translation

ND4 gene

ND4 gene

ND4 misc

ND4 gene

11,230 11,240 11,250 11,260 11,270 11,280 11,290 11,300 11,310 11,320 11,330 11,340 11,350

Consensus  
Translation

Identity

Choloepus\_didactylus\_NC  
Translation

Myiodon\_darwinii\_Delsuc  
Translation

Myiodon\_darwinii\_Slater  
Translation

ND4 gene

ND4 gene

ND4 misc

ND4 gene

11,360 11,370 11,380 11,390 11,400 11,410 11,420 11,430 11,440 11,450 11,460 11,470 11,480

Consensus  
Translation

Identity

Choloepus\_didactylus\_NC  
Translation

W S F M G A S T L M I A H G L T S S L L F C L A N T N Y E R T H S R T M M L T R G L Q T

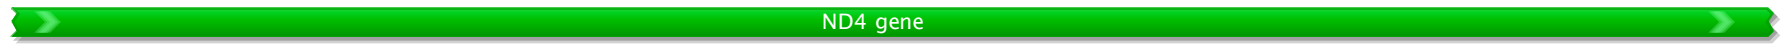

Myiodon\_darwinii\_Delsuc  
Translation

W S F M G A S A L M I A H G L T S S L L F C L A N T N Y E R V H S R T M I L A R G L Q T

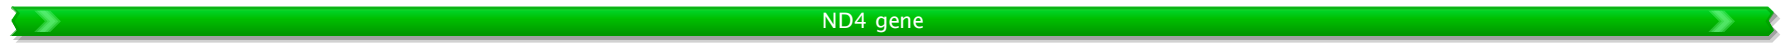

Myiodon\_darwinii\_Slater  
Translation

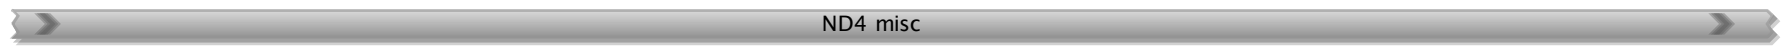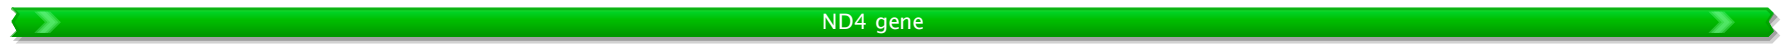

11,490 11,500 11,510 11,520 11,530 11,540 11,550 11,560 11,570 11,580 11,590 11,600 11,610

Consensus  
Translation

Identity

Choloepus\_didactylus\_NC  
Translation

L L P L M A L W W L L A N L S N L A L P P T I N L I G E L F V I M P T I S W S N I T I A

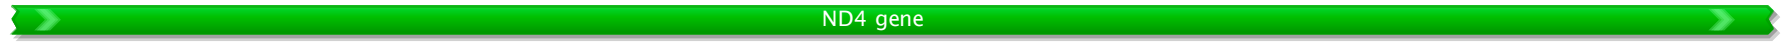

Myiodon\_darwinii\_Delsuc  
Translation

L L P L M A L W W L L A S L A N L A L P P T I N L I G E L F I I L P T F S W S N I T I T

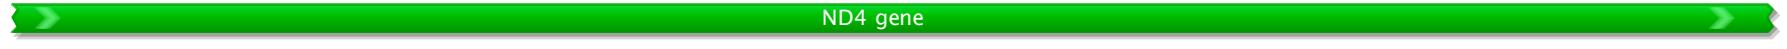

Myiodon\_darwinii\_Slater  
Translation

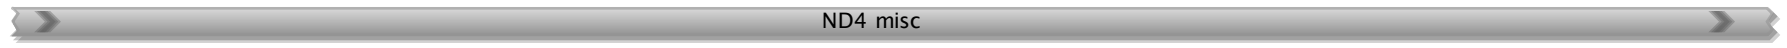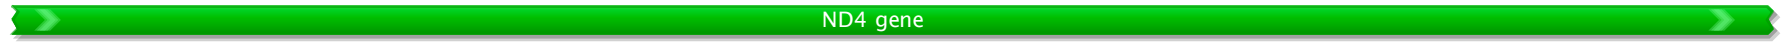

11,620 11,630 11,640 11,650 11,660 11,670 11,680 11,690 11,700 11,710 11,720 11,730 11,740

Consensus  
 Translation

Identity

Choloepus\_didactylus\_NC  
 Translation



Myiodon\_darwini\_Delsuc  
 Translation



Myiodon\_darwini\_Slater  
 Translation



11,750 11,760 11,770 11,780 11,790 11,800 11,810 11,820 11,830 11,840 11,850 11,860 11,870 11,880

Consensus  
 Translation

Identity

Choloepus\_didactylus\_NC  
 Translation

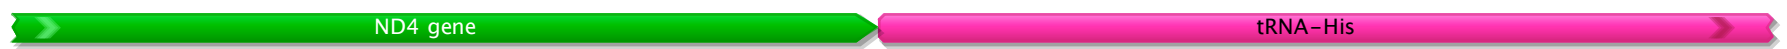

Myiodon\_darwini\_Delsuc  
 Translation

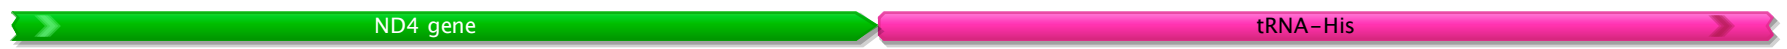

Myiodon\_darwini\_Slater  
 Translation

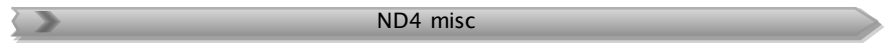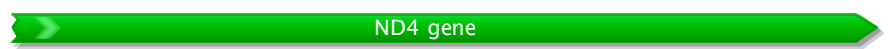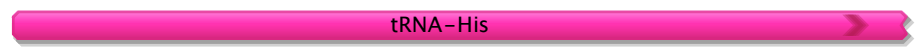

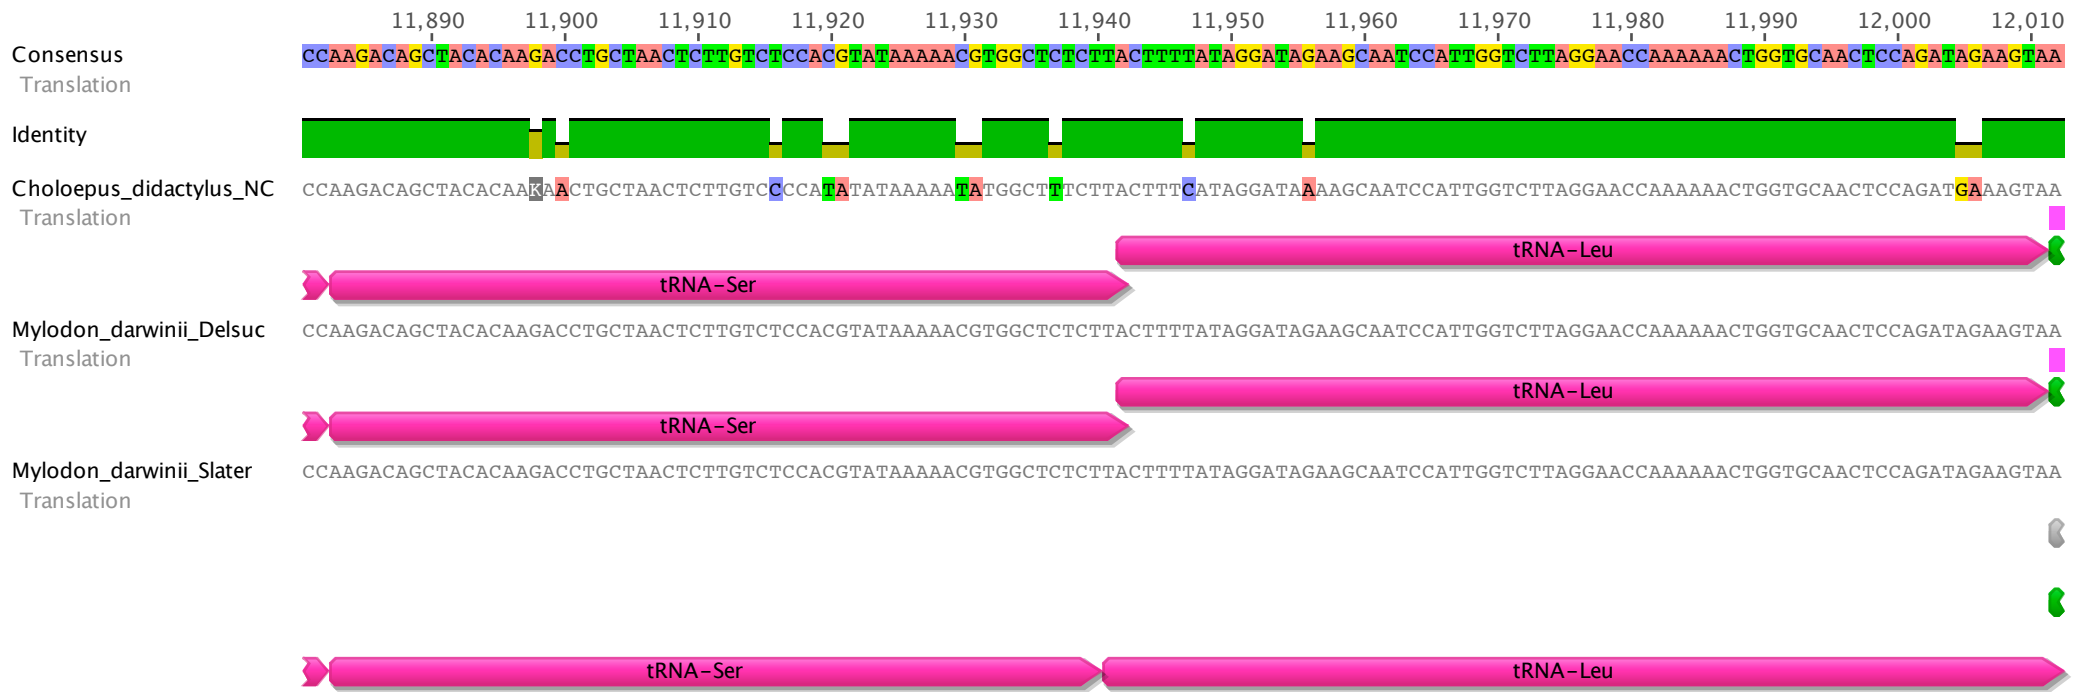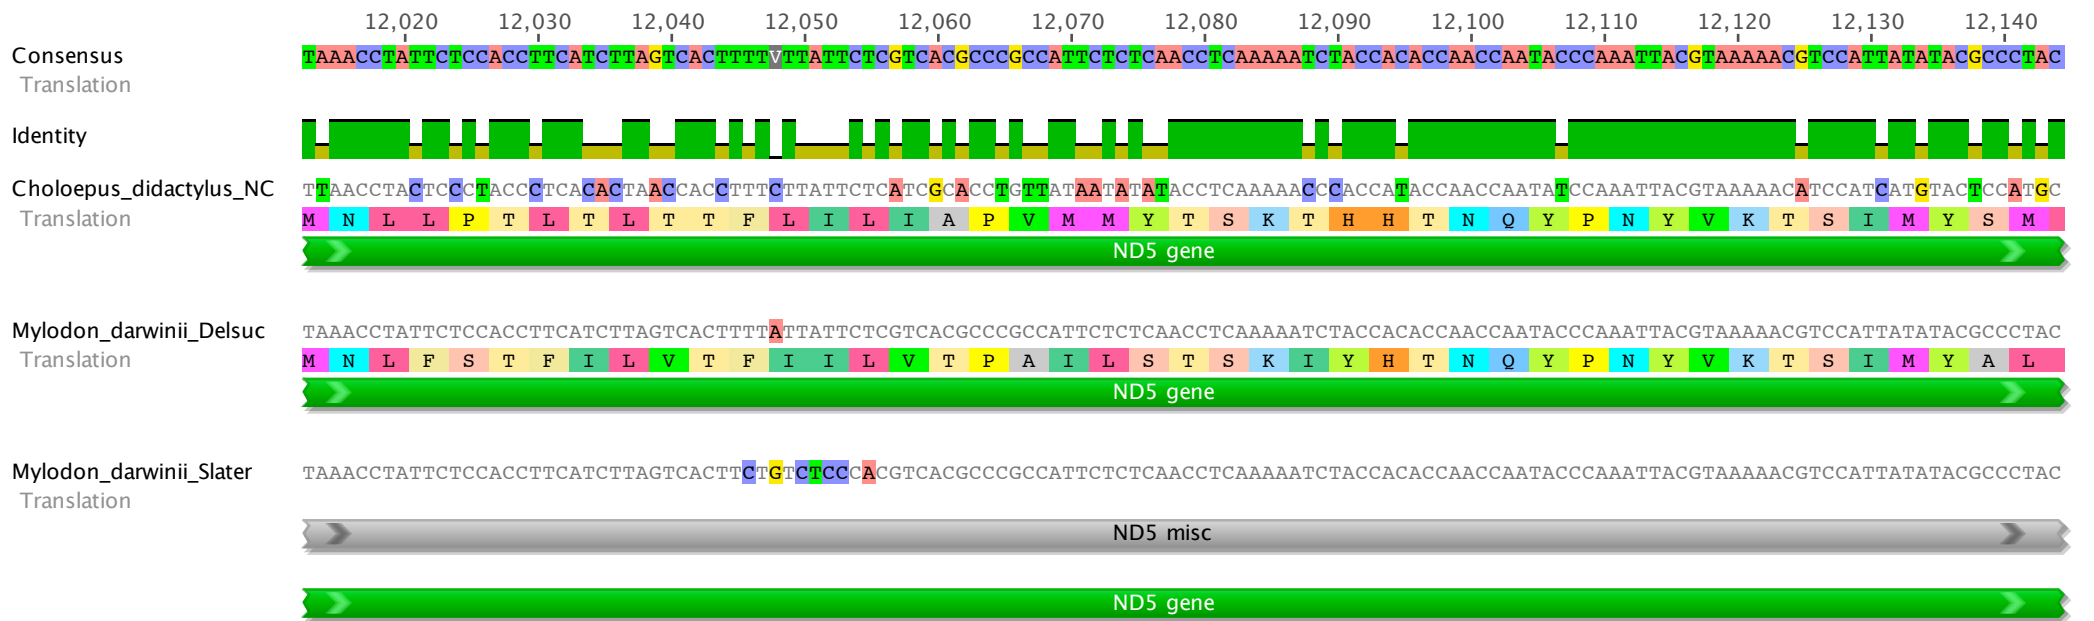



12,150 12,160 12,170 12,180 12,190 12,200 12,210 12,220 12,230 12,240 12,250 12,260 12,270

Consensus  
 Translation

Identity

Choloepus\_didactylus\_NC  
 Translation

ND5 gene

Myiodon\_darwinii\_Delsuc  
 Translation

ND5 gene

Myiodon\_darwinii\_Slater  
 Translation

ND5 misc

ND5 gene

12,280 12,290 12,300 12,310 12,320 12,330 12,340 12,350 12,360 12,370 12,380 12,390 12,400

Consensus  
 Translation

Identity

Choloepus\_didactylus\_NC  
 Translation

ND5 gene

Myiodon\_darwinii\_Delsuc  
 Translation

ND5 gene

Myiodon\_darwinii\_Slater  
 Translation

ND5 misc

ND5 gene

12,410 12,420 12,430 12,440 12,450 12,460 12,470 12,480 12,490 12,500 12,510 12,520 12,530 12,540

Consensus  
Translation

Identity

Choloepus\_didactylus\_NC  
Translation

ND5 gene

Myiodon\_darwinii\_Delsuc  
Translation

ND5 gene

Myiodon\_darwinii\_Slater  
Translation

ND5 misc

ND5 gene

12,550 12,560 12,570 12,580 12,590 12,600 12,610 12,620 12,630 12,640 12,650 12,660 12,670

Consensus  
Translation

Identity

Choloepus\_didactylus\_NC  
Translation

ND5 gene

Myiodon\_darwinii\_Delsuc  
Translation

ND5 gene

Myiodon\_darwinii\_Slater  
Translation

ND5 misc

ND5 gene

12,680 12,690 12,700 12,710 12,720 12,730 12,740 12,750 12,760 12,770 12,780 12,790 12,800

Consensus  
 Translation

Identity

Choloepus\_didactylus\_NC  
 Translation

TAGGAAAAATCCGCCCAATTCGGCCCTACACCCATGACTACCCCTCAGCCATGGAAGGACCTACTCCAGTATCCGCATTATTGCATTCCAGTACTATAGTAGTGGCAGGCATCTTCCTACTCGTACGATTCCACC

T G K S A Q F G L H P W L P S A M E G P T P V S A L L H S S T M V V A G I F L L V R F H

ND5 gene

Myiodon\_darwinii\_Delsuc  
 Translation

TAGGAAAAATCCGCCCAATTCGGCCCTACACCCATGACTACCCCTCAGCCATGGAAGGACCTCACCCTCGTATCCGCATCTATTCGATTCCAGTACTATAGTAGTGGCAGGCATCTTCCTACTCGTACGATTCCACC

M G K S A Q F G L H P W L P S A M E G P T P V S A L L H S S T M V V A G I F L L V R F H

ND5 gene

Myiodon\_darwinii\_Slater  
 Translation

TAGGAAAAATCCGCCCAATTCGGCCCTACACCCATGACTACCCCTCAGCCCTGGTAAAGACCTACTCCAGTATCCGCATTATTGCATTCCAGTACTATAGTAGTGGCAGGCATCTTCCTACTCGTACGATTCCACC

ND5 misc

ND5 gene

12,810 12,820 12,830 12,840 12,850 12,860 12,870 12,880 12,890 12,900 12,910 12,920 12,930

Consensus  
 Translation

Identity

Choloepus\_didactylus\_NC  
 Translation

CCCTCCTACAAAAAATAAACTAATCCTCACACTAGCCATATGTCTAGGGGCCATCACCACGCTATTCACCAGCAATCTGTGCCTTAAACACAGAATGATATTAATAAAAAATCGTAGCCTTTTCTACATCCAGCC

P M L Q N N S P I L T L T M C L G A I T T L F T A I C A L T Q N D I K K I I A F S T S S

ND5 gene

Myiodon\_darwinii\_Delsuc  
 Translation

CCCTCCTACAAAAAATAAACTAATCCTCACACTAGCCATATGTCTAGGGGCCATCACCACGCTATTCACCAGCAATCTGTGCCTTAAACACAGAATGATATTAATAAAAAATCGTAGCCTTTTCTACATCCAGCC

P L L Q N N K L I L T L A M C L G A I T T L F T A I C A L T Q N D I K K I V A F S T S S

ND5 gene

Myiodon\_darwinii\_Slater  
 Translation

CCCTCCTACAAAAAATAAACTAATCCTCACACTAGCCATATGTCTAGGGGCCATCACCACGCTATTCACCAGCAATCTGTGCCTTAAACACAGAATGATATTAATAAAAAATCGTAGCCTTTTCTACATCCAGCC

ND5 misc

ND5 gene

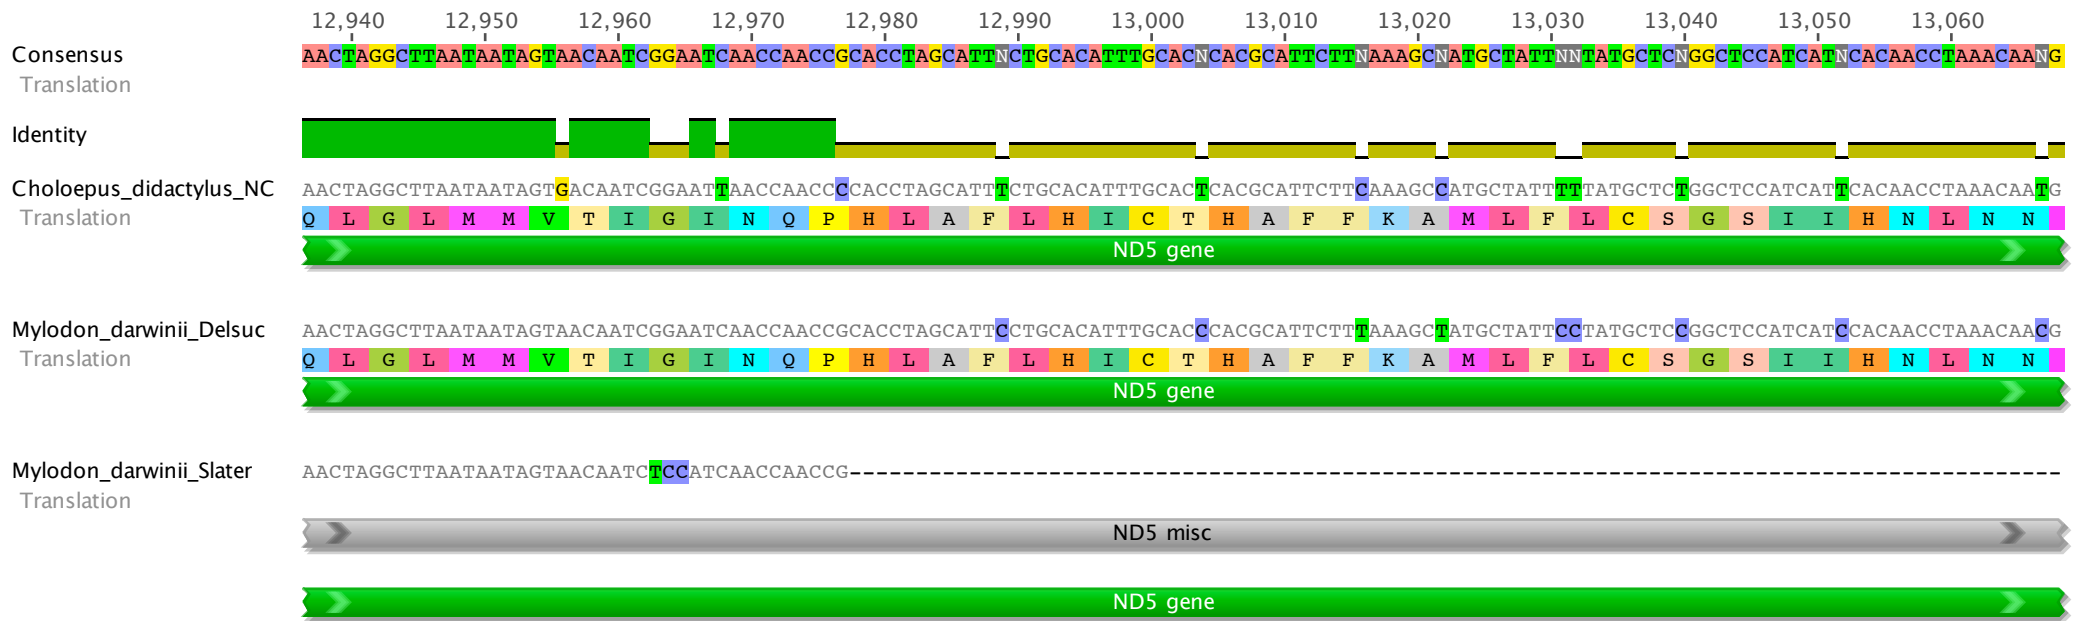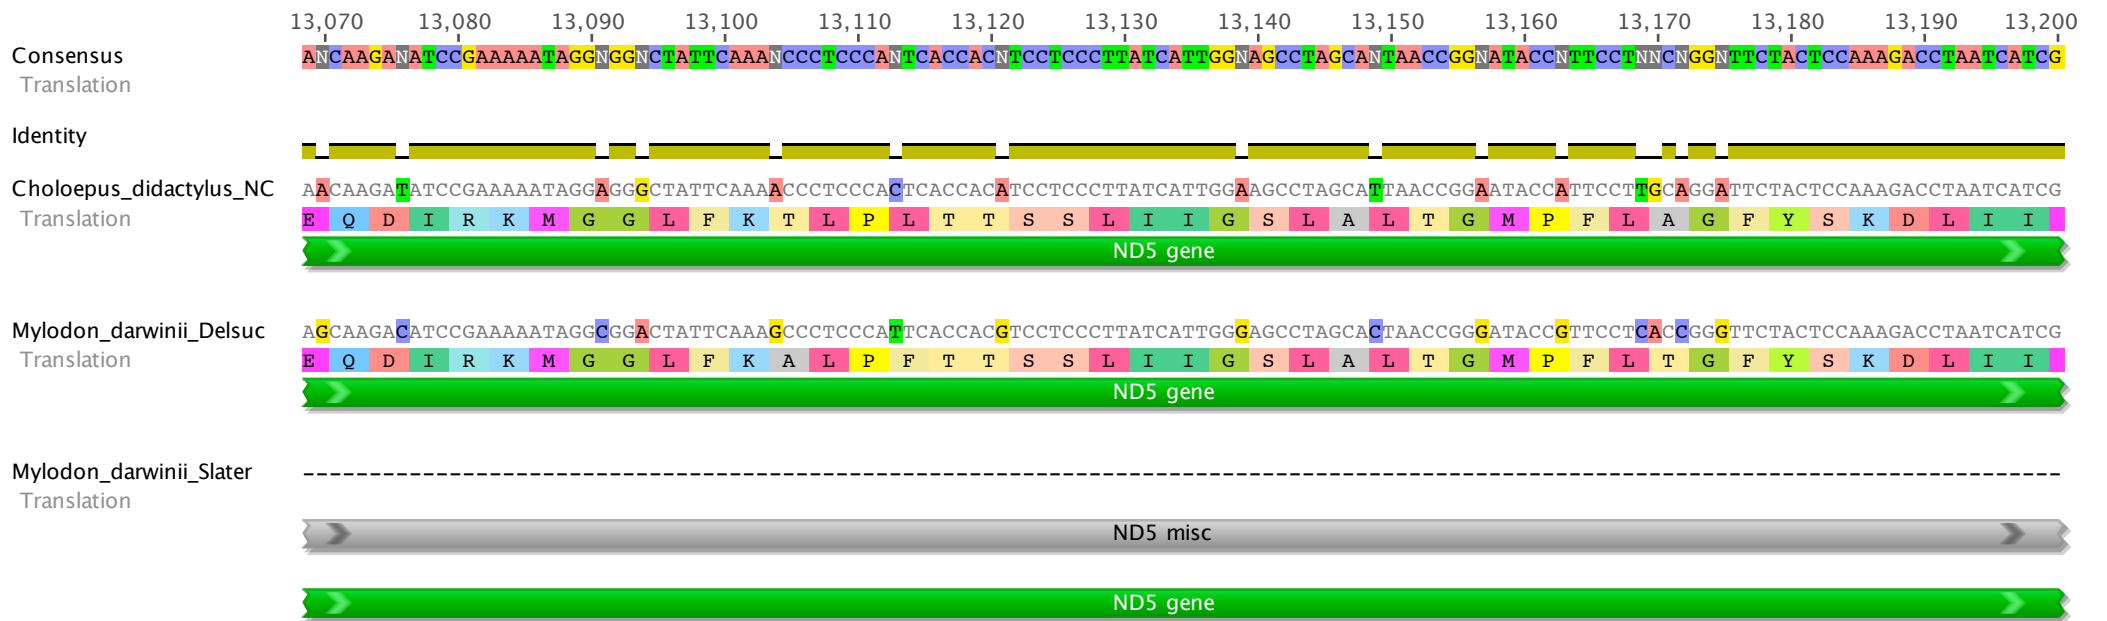

13,210 13,220 13,230 13,240 13,250 13,260 13,270 13,280 13,290 13,300 13,310 13,320 13,330  
Consensus  
Translation

Identity  
Choloepus\_didactylus\_NC  
Translation

Myiodon\_darwinii\_Delsuc  
Translation

Myiodon\_darwinii\_Slater  
Translation

13,340 13,350 13,360 13,370 13,380 13,390 13,400 13,410 13,420 13,430 13,440 13,450 13,460  
Consensus  
Translation

Identity  
Choloepus\_didactylus\_NC  
Translation

Myiodon\_darwinii\_Delsuc  
Translation

Myiodon\_darwinii\_Slater  
Translation

13,470 13,480 13,490 13,500 13,510 13,520 13,530 13,540 13,550 13,560 13,570 13,580 13,590

Consensus  
 Translation

Identity

Choloepus\_didactylus\_NC  
 Translation

ND5 gene

Myiodon\_darwinii\_Delsuc  
 Translation

ND5 gene

Myiodon\_darwinii\_Slater  
 Translation

ND5 misc

ND5 gene

13,600 13,610 13,620 13,630 13,640 13,650 13,660 13,670 13,680 13,690 13,700 13,710 13,720

Consensus  
 Translation

Identity

Choloepus\_didactylus\_NC  
 Translation

ND5 gene

Myiodon\_darwinii\_Delsuc  
 Translation

ND5 gene

Myiodon\_darwinii\_Slater  
 Translation

ND5 misc

ND5 gene

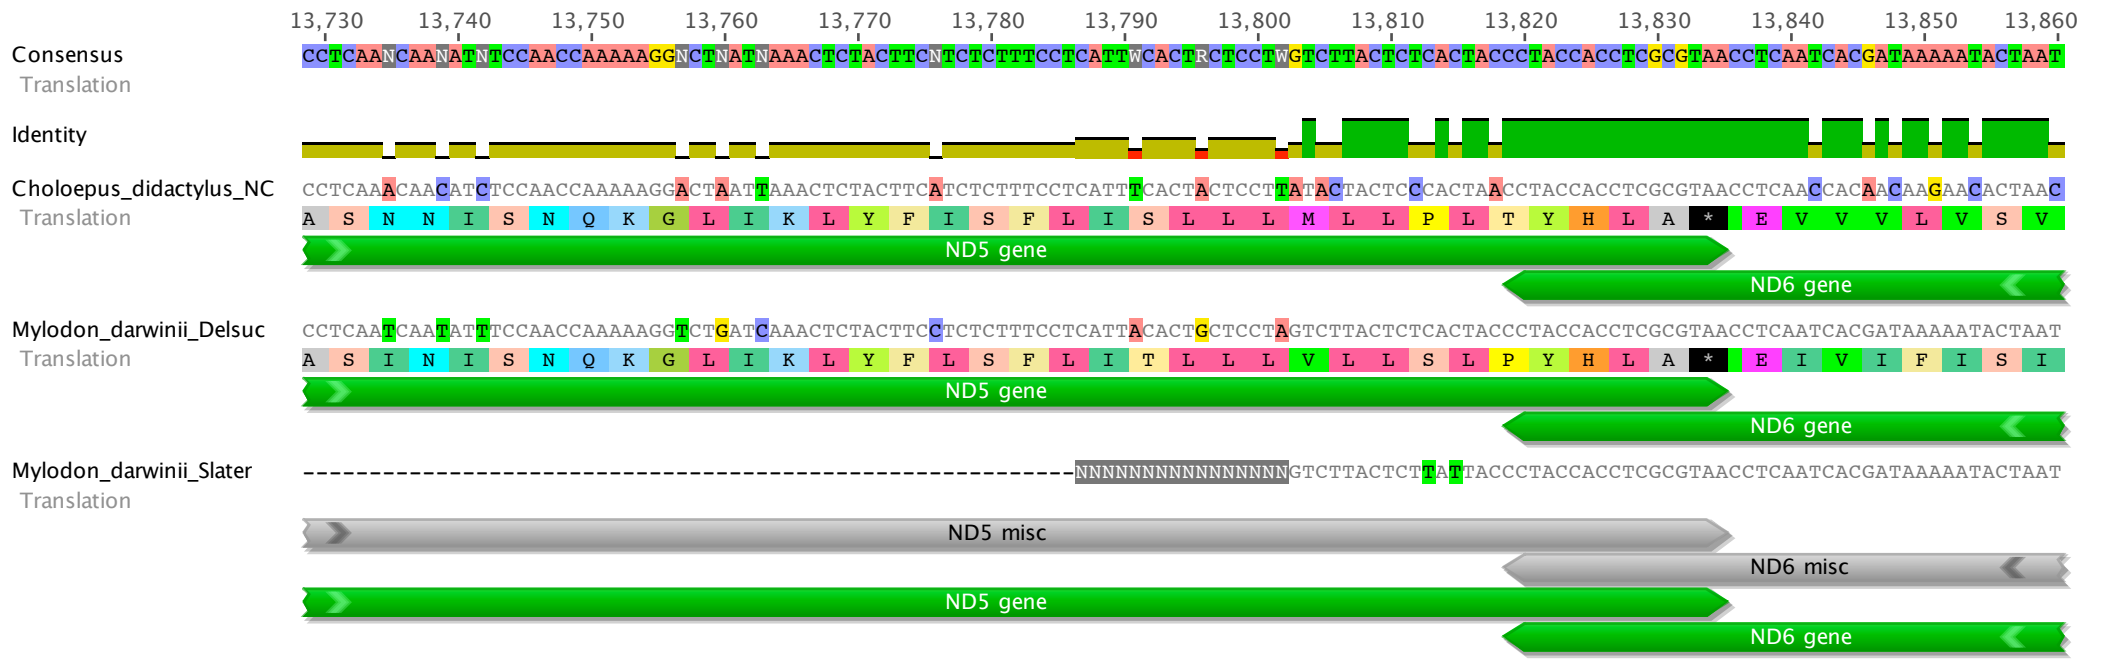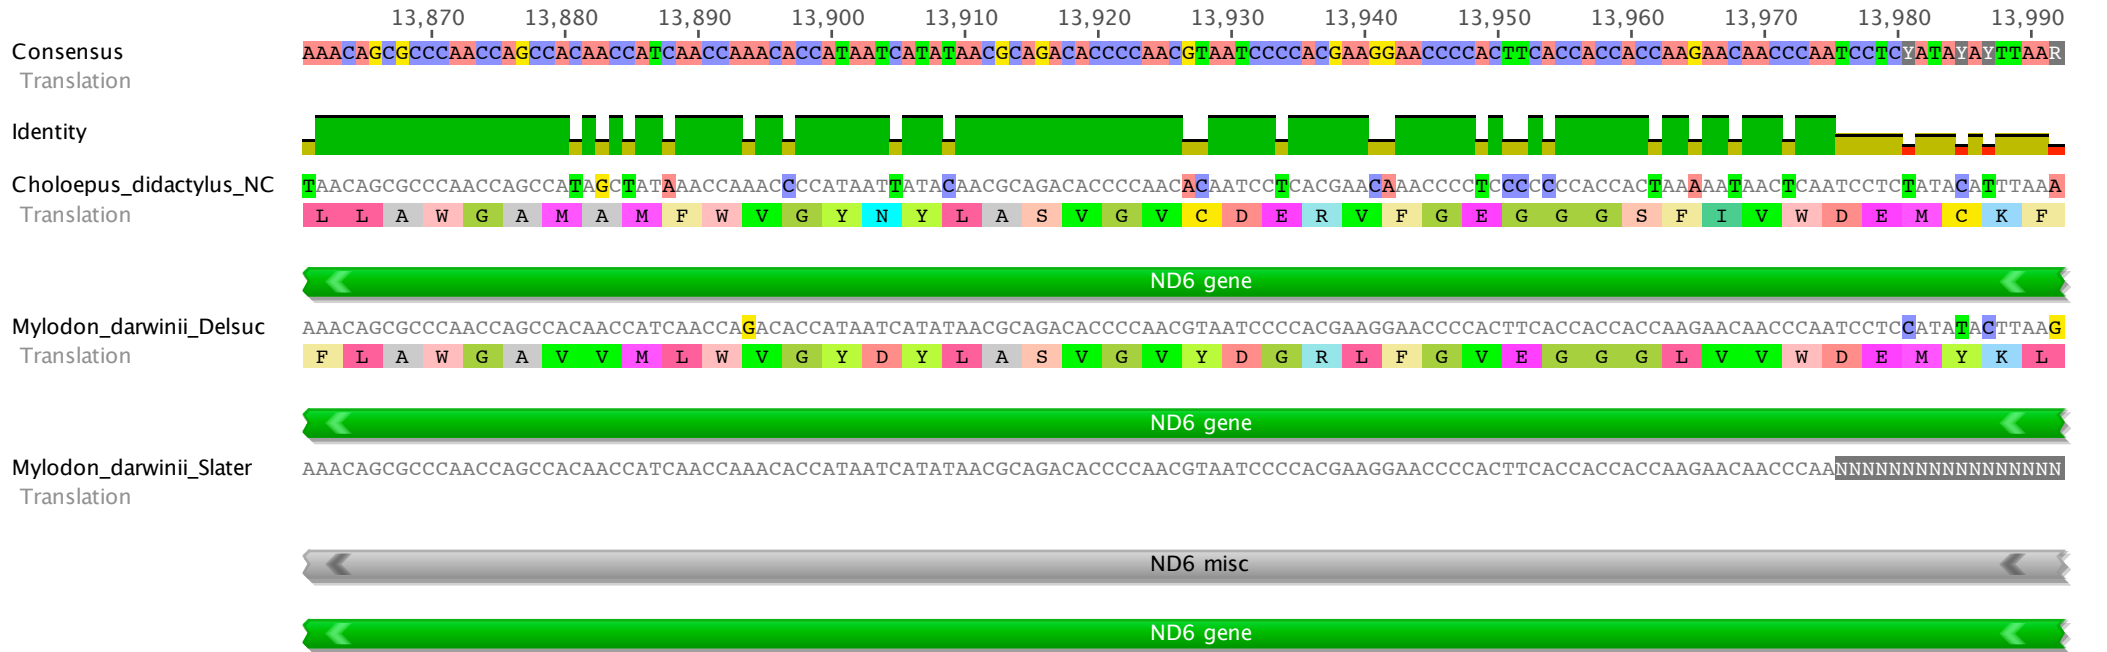





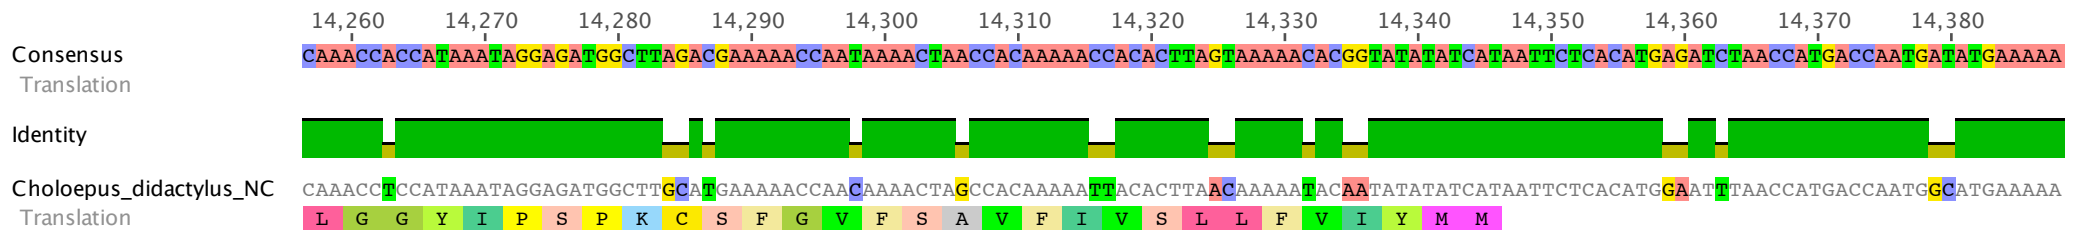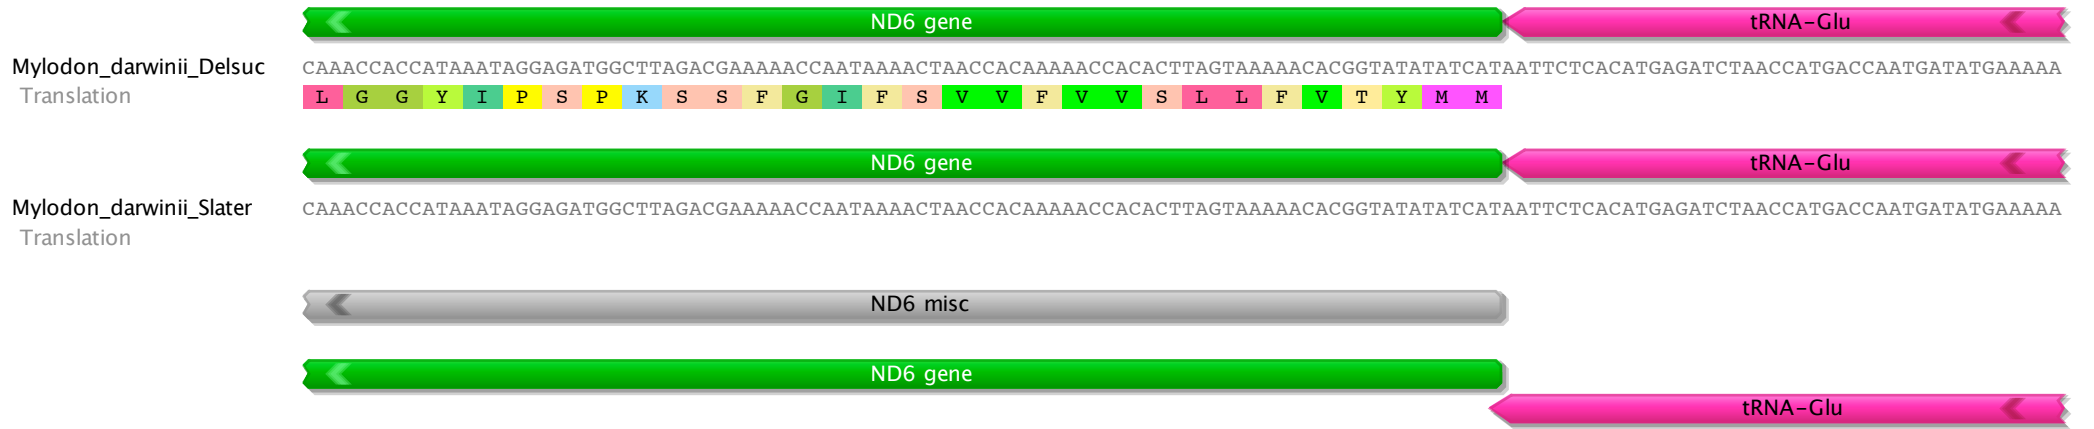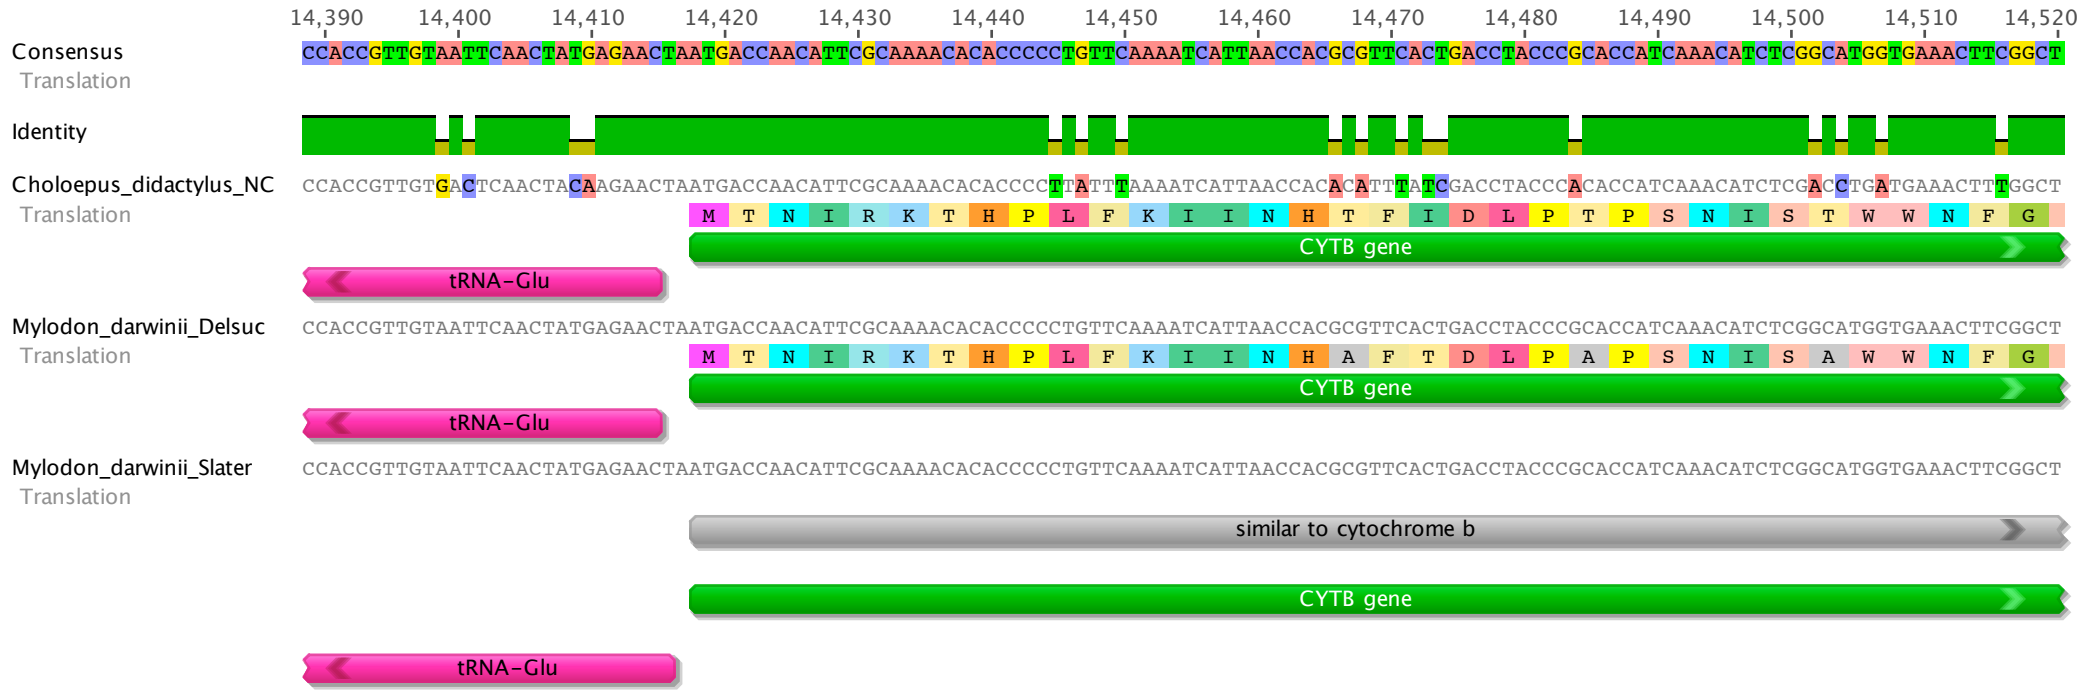

14,530 14,540 14,550 14,560 14,570 14,580 14,590 14,600 14,610 14,620 14,630 14,640 14,650

Consensus  
Translation

Identity

Choloepus\_didactylus\_NC  
Translation

S L L G M C L I M Q I L T G L F L A M H Y -- T P D T T T A F S S V T H I C R D V N Y G W I

CYTB gene

Myiodon\_darwinii\_Delsuc  
Translation

S L L G I C L I M Q I L T G L F L A M H Y -- T S D T I T A F S S V T H I C R D V N Y G W I

CYTB gene

Myiodon\_darwinii\_Slater  
Translation

CCCGCATCCGACACAATCACCGCCTTCTCGTCCGTACCCACATCTGCCGAGACGTAAACTACGGCTGAAT

similar to cytochrome b

CYTB gene

14,660 14,670 14,680 14,690 14,700 14,710 14,720 14,730 14,740 14,750 14,760 14,770 14,780

Consensus  
Translation

Identity

Choloepus\_didactylus\_NC  
Translation

I R Y L H T N G A S M F F I C L Y L H I G R S M Y Y G S Y T Y L K T W N I G I M L L F T

CYTB gene

Myiodon\_darwinii\_Delsuc  
Translation

I R Y L H A N G A S M F F V C L Y M H I G R G L Y Y G S Y S Y L E T W N I G V L L L F T

CYTB gene

Myiodon\_darwinii\_Slater  
Translation

ACTCCTACTCAATACTAGAAACCTGAAACATTGGAGTCATCTACTATTAC

similar to cytochrome b

CYTB gene

14,790 14,800 14,810 14,820 14,830 14,840 14,850 14,860 14,870 14,880 14,890 14,900 14,910

Consensus  
Translation

Identity

Choloepus\_didactylus\_NC  
Translation

CGTAATAGCCACAGCATTTCATAGGCTATGTACTTCCATGAGGACAAAATATCATTCTGAGGAGCAACAGTAAATACAAACCTACTCTCAGCCATCCCATACATCGGAACAGATCTAGTAGAATGAATCTGAGG

V M A T A F M G Y V L P W G Q M S F W G A T V I T N L L S A I P Y I G T N L V E W I W G

CYTB gene

Myiodon\_darwinii\_Delsuc  
Translation

TGTTATAGCCACAGCATTATATAGGCTATGTACTTCCATGAGGACAAAATATCATTCTGAGGAGCAACAGTAATTACAAACCTACTCTCAGCCATCCCATACATCGGAACAGATCTAGTAGAATGAATCTGAGG

V M A T A F M G Y V L P W G Q M S F W G A T V I T N L L S A I P Y I G T D L V E W I W G

CYTB gene

Myiodon\_darwinii\_Slater  
Translation

TGTTATAGCCACAGCATTATATAGGCTATGTACTTCCATGAGGACAAAATATCATTCTGAGGAGCAACAGTAATTACAAACCTACTCTCAGCCATCCCATACATCGGAACAGATCTAGTAGAATGAATCTGAGG

similar to cytochrome b

CYTB gene

14,920 14,930 14,940 14,950 14,960 14,970 14,980 14,990 15,000 15,010 15,020 15,030 15,040

Consensus  
Translation

Identity

Choloepus\_didactylus\_NC  
Translation

GGGATTTCCGTAGACAAAAGCCACATTAACCCGATTCTTTCCTTCCATTTCACTCCATTCATATCCCTGGCCCTCGTACTAACACACCTGCTTTTCCCTACACGAAACCGGATCAAACAACCCACTAGG

G F S V D K A T L T R F F A F H F I L P F I I L A L V L T H L L F L H E T G S N N P L G

CYTB gene

Myiodon\_darwinii\_Delsuc  
Translation

CGGATTTCCGTAGACAAAAGCCACATTAACCCGCTTCTTTCCTTCCATTTTCATCCTTCCATTCATATCCTGGCCCTCGTACTAACACACCTGCTTTTCCCTACACGAAACCGGATCAAACAACCCACTAGG

G F S V D K A T L T R F F A F H F I L P F I I L A L V L T H L L F L H E T G S N N P L G

CYTB gene

Myiodon\_darwinii\_Slater  
Translation

CGGATTTCCGTAGACAAAAGCCACATTAACCCGCTTCTTTCCTTCCATTTTCATCCTTCCATTCATATCCTGGCCCTCGTACTAACACACCTGCTTTTCCCTACACGAAACCGGATCAAACAACCCACTAGG

similar to cytochrome b

CYTB gene

15,050 15,060 15,070 15,080 15,090 15,100 15,110 15,120 15,130 15,140 15,150 15,160 15,170 15,180

Consensus  
 Translation

Identity

Choloepus\_didactylus\_NC  
 Translation

I S P D S D K I P F H P Y Y T M K D I L G L L P M I F I M M A L A L F Y P D L L G D P D

CYTB gene

Myiodon\_darwinii\_Delsuc  
 Translation

I S S D S D K I P F H P Y Y T V K D I L G L F L M I L I M L T L V L F Y P D L L G D P D

CYTB gene

Myiodon\_darwinii\_Slater  
 Translation

similar to cytochrome b

CYTB gene

15,190 15,200 15,210 15,220 15,230 15,240 15,250 15,260 15,270 15,280 15,290 15,300 15,310

Consensus  
 Translation

Identity

Choloepus\_didactylus\_NC  
 Translation

N Y T P A N P L N T P P H I K P E W Y F L F A Y A I L R S I P N K L G G V M A L V L S I

CYTB gene

Myiodon\_darwinii\_Delsuc  
 Translation

N Y T P A N P L N T P P H I K P E W Y F L F A Y A I L R S I P N K L G G V L A L I C S I

CYTB gene

Myiodon\_darwinii\_Slater  
 Translation

similar to cytochrome b

CYTB gene

15,320 15,330 15,340 15,350 15,360 15,370 15,380 15,390 15,400 15,410 15,420 15,430 15,440

Consensus  
Translation

Identity

Choloepus\_didactylus\_NC  
Translation

L I L A I L P M L H T A K Q R S L M F R P I S Q C L F W M L M T N L L V L T W I G G Q P

CYTB gene

Myiodon\_darwinii\_Delsuc  
Translation

L V L V I I P M L H T A K Q R S L M F R P I S Q C L F W M L V A N L L I L T W I G G Q P

CYTB gene

Myiodon\_darwinii\_Slater  
Translation

similar to cytochrome b

CYTB gene

15,450 15,460 15,470 15,480 15,490 15,500 15,510 15,520 15,530 15,540 15,550 15,560 15,570

Consensus  
Translation

Identity

Choloepus\_didactylus\_NC  
Translation

V E H P F T I I G Q L A S I S Y F S I I L I L M P M A G L I E N N L M K W

CYTB gene

Myiodon\_darwinii\_Delsuc  
Translation

V E H P F T I I G Q L A S I S Y F S I I L V L M P V A G L I E N N L M K W \*

CYTB gene

Myiodon\_darwinii\_Slater  
Translation

similar to cytochrome b

CYTB gene

tRN...

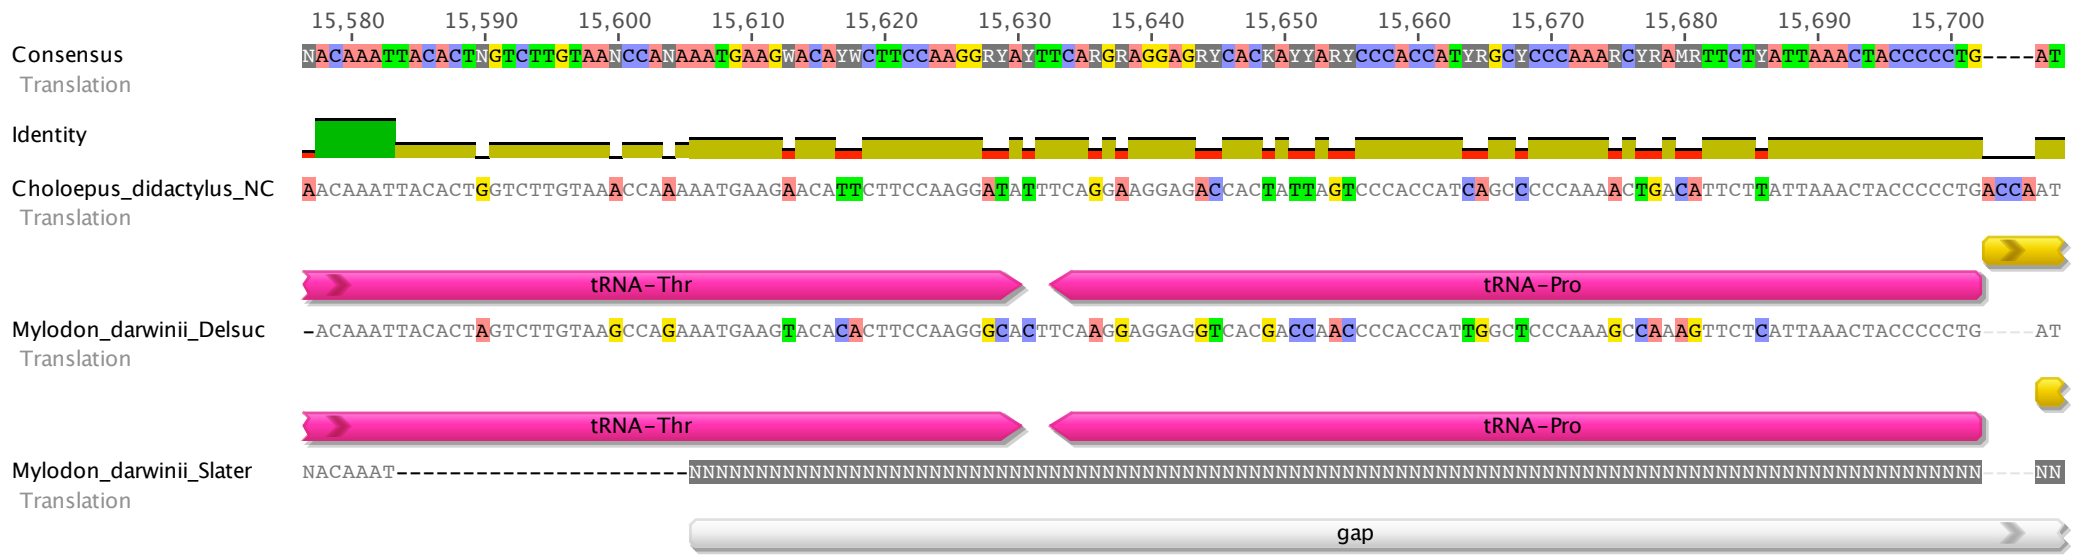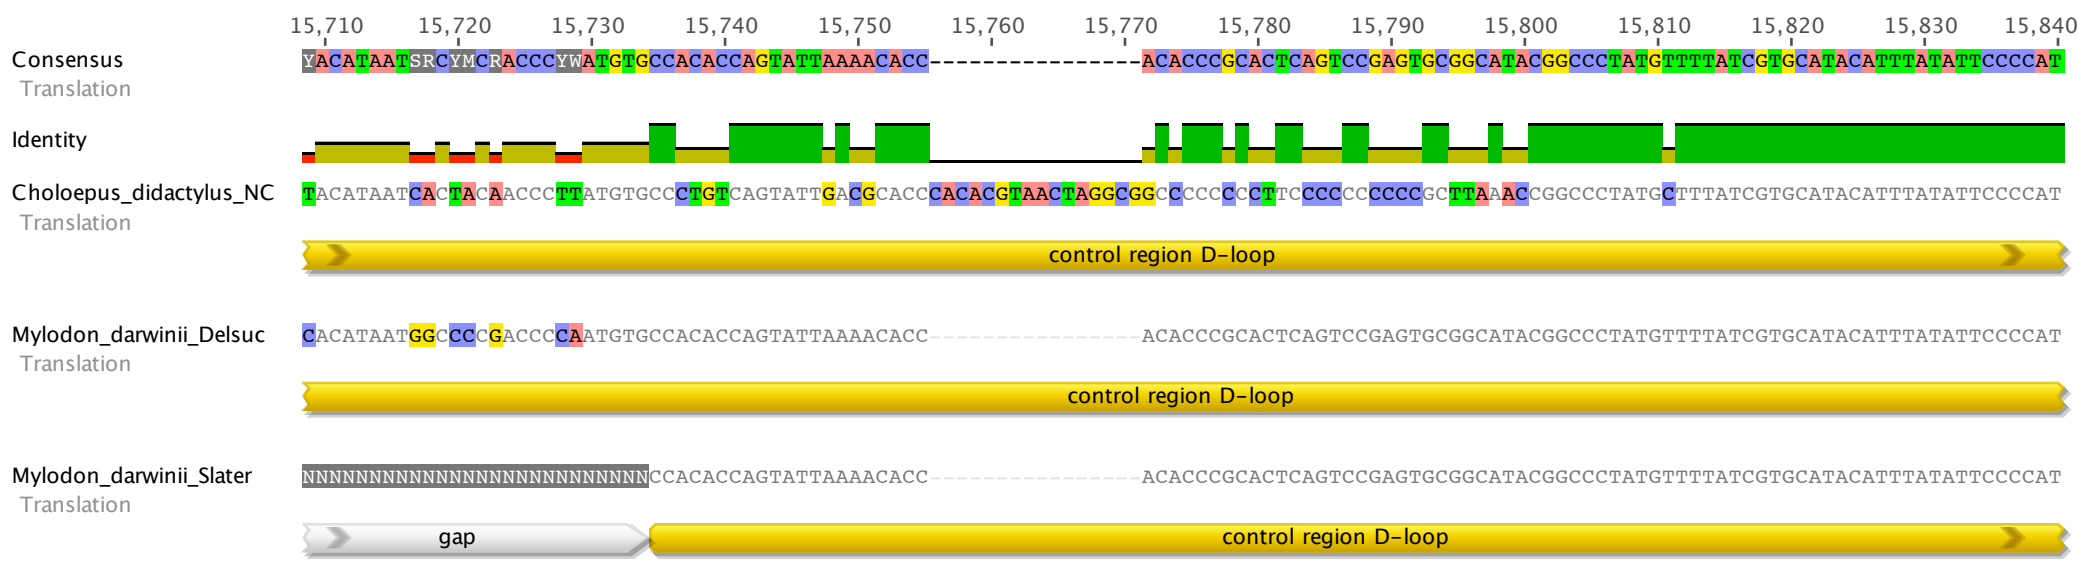

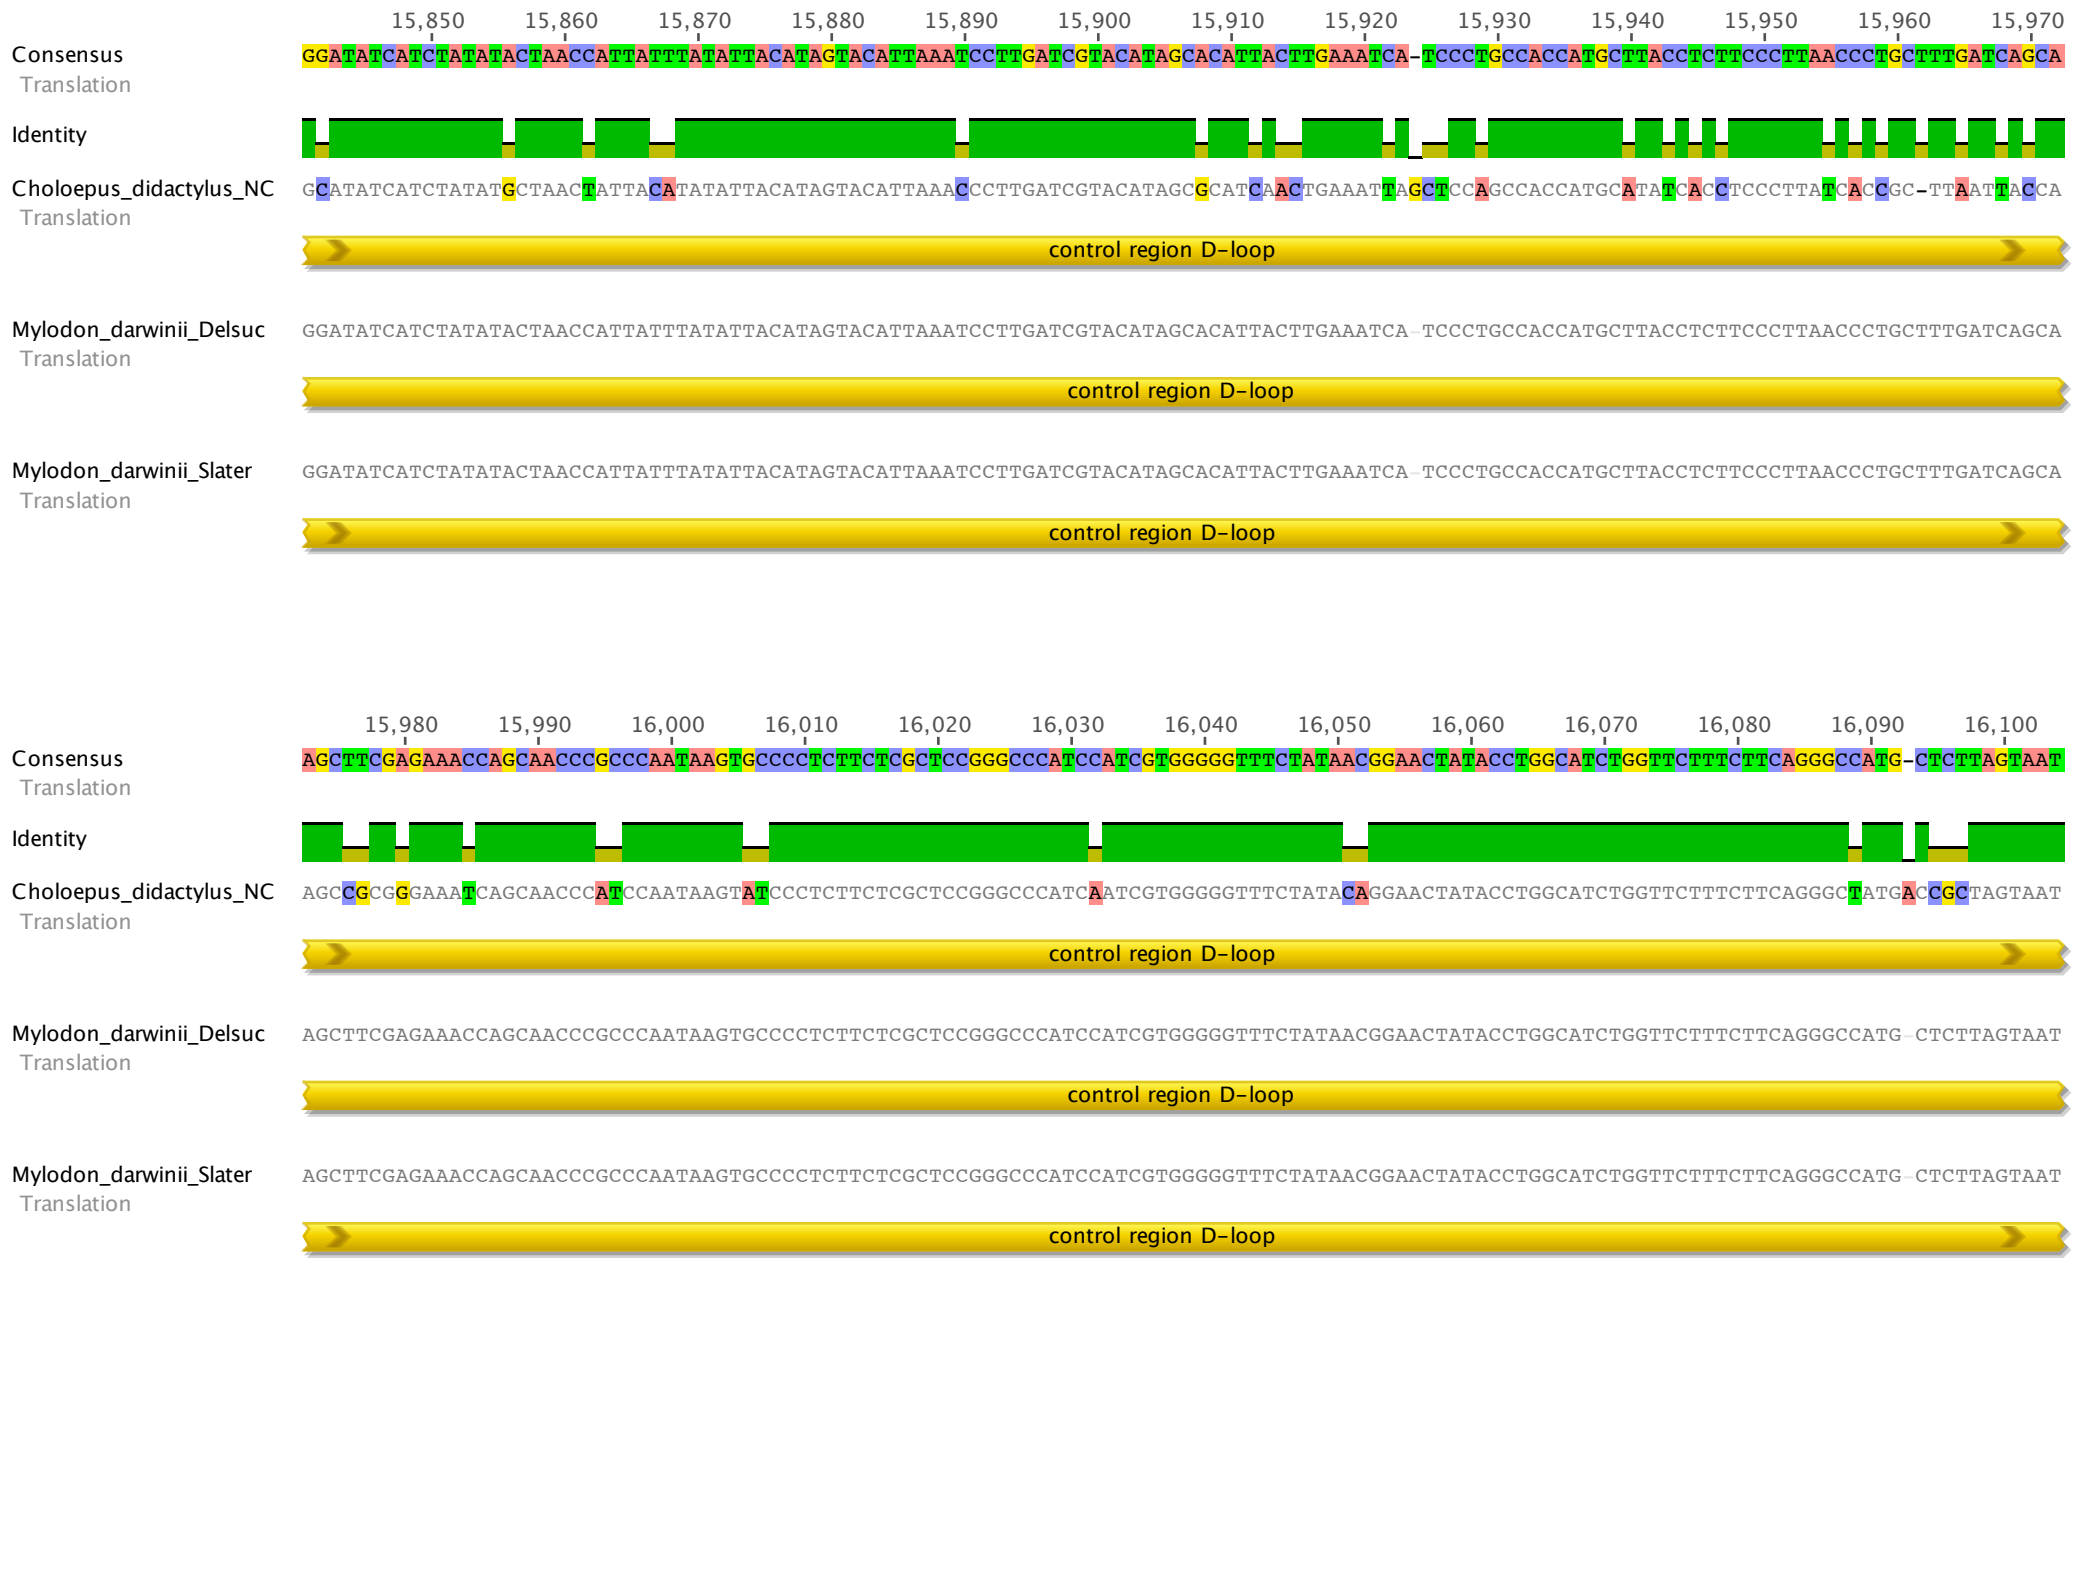







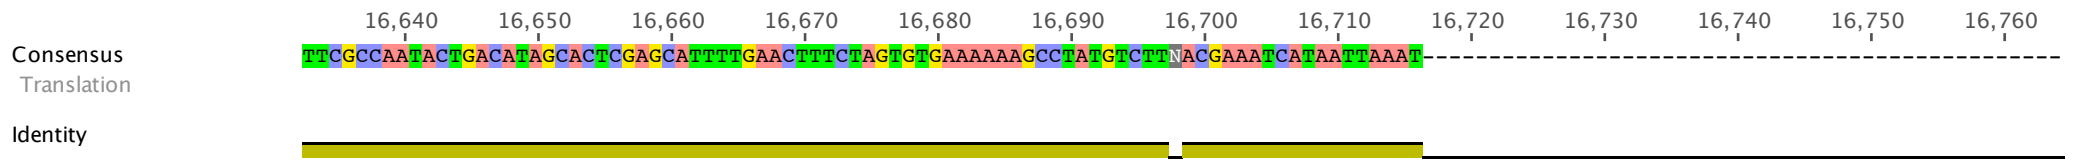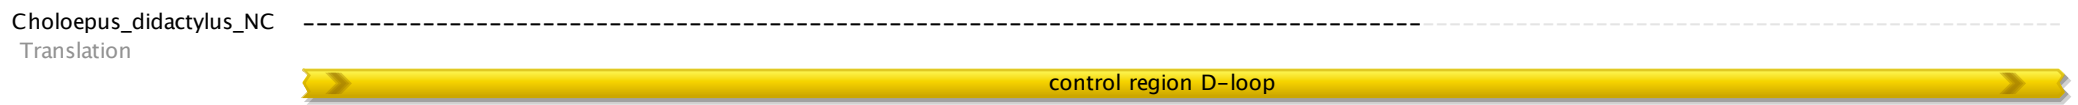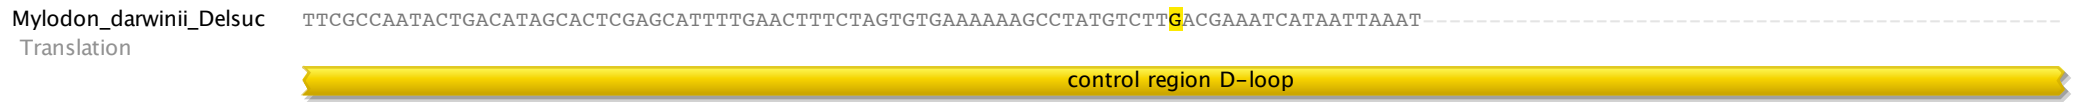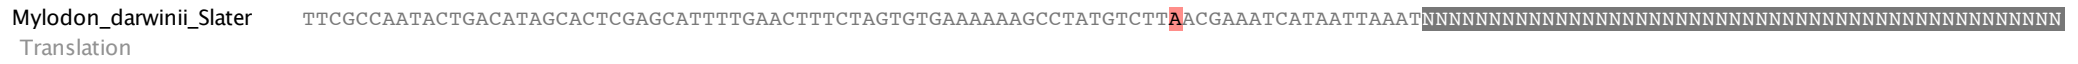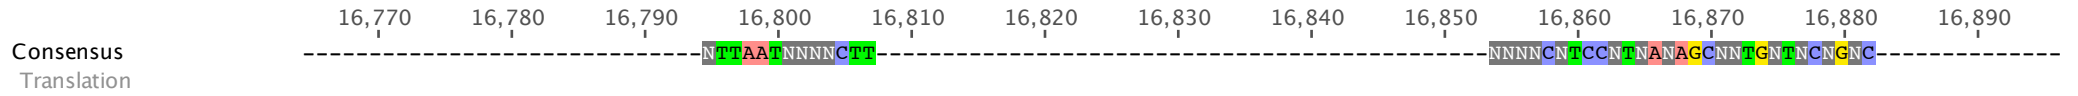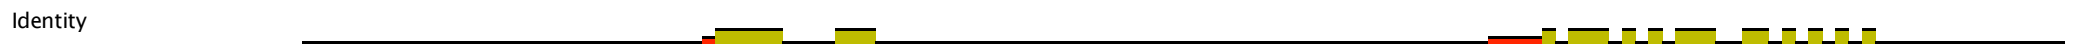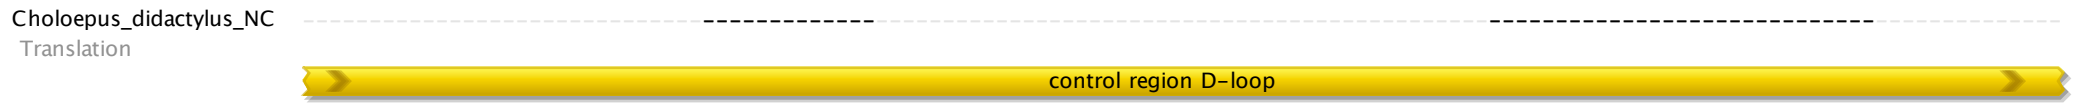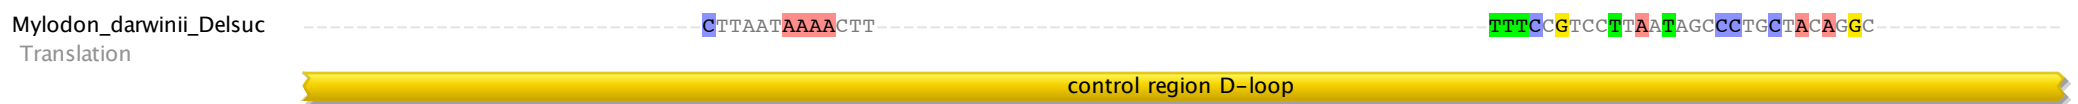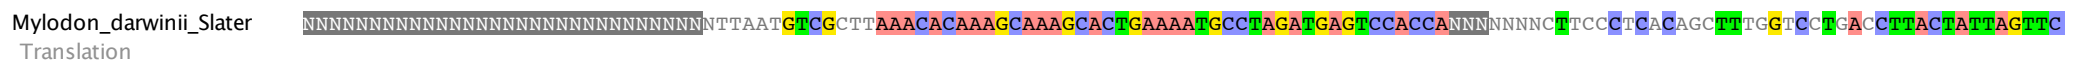

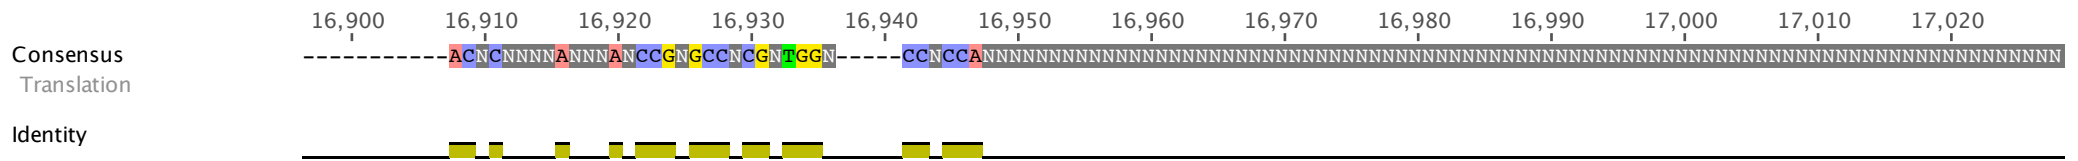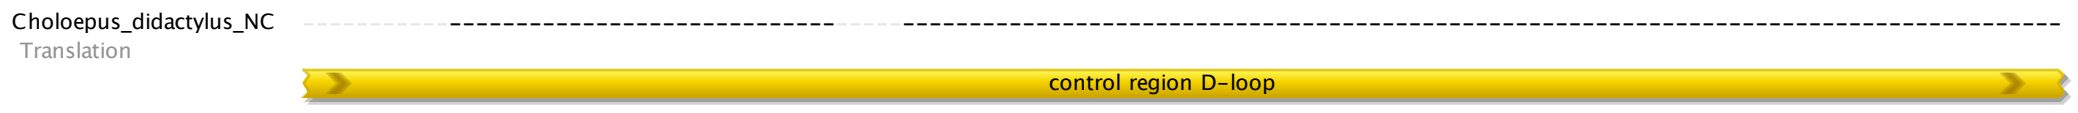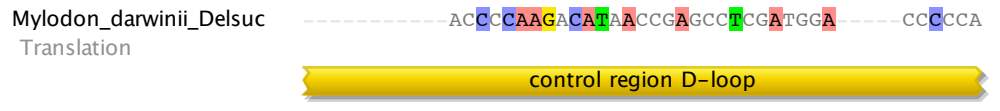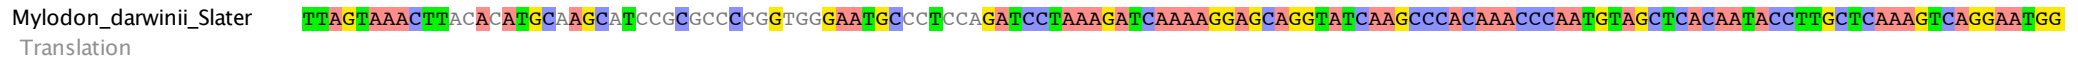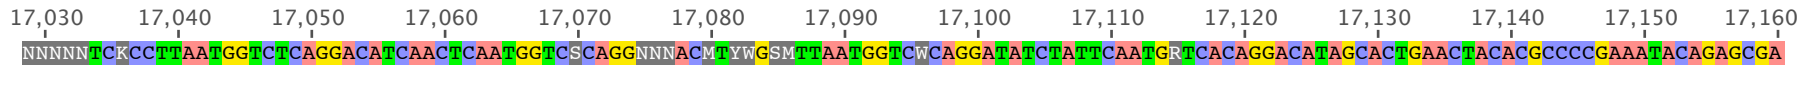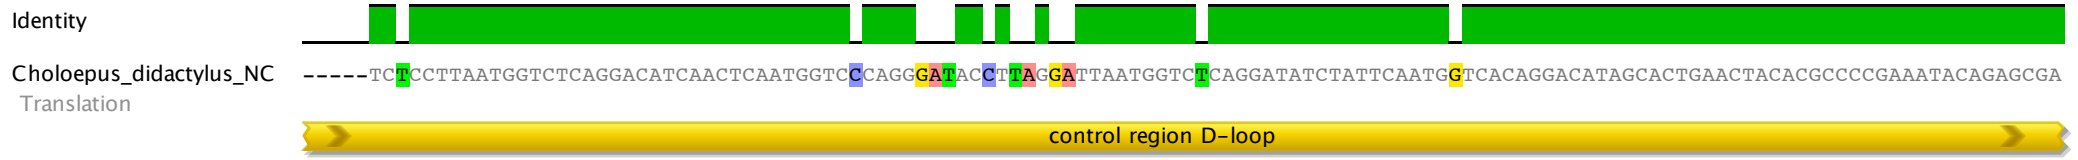

Myiodon\_darwinii\_Delsuc  
Translation

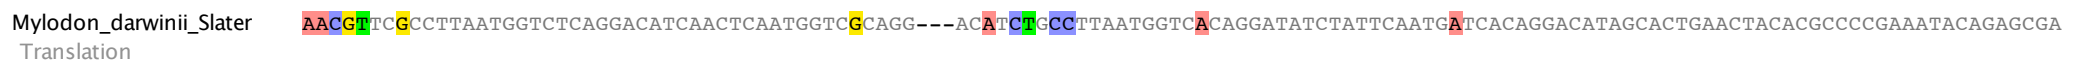

17,170 17,180 17,190 17,200 17,210 17,220 17,230 17,240 17,250 17,260 17,270 17,280 17,290

Consensus  
Translation

Identity

Choloepus\_didactylus\_NC  
Translation

TAAGCATAAGTGCCCAACAAATGACAATACTCCTATTTTTTTCTCATTATAATAGCAATATTTCCATTTGCGCCAATACTGACATAGCACTCAAGCATTTTGAATTTCTACTGTGAAAAAGCCATATGTCT

control region D-loop

Myiodon\_darwinii\_Delsuc  
Translation

Myiodon\_darwinii\_Slater  
Translation

TAAGCATAAGTGCCCAACAAATGACAATACTCCTATTTTTTTCTCATTATAATAGCGATATTTCCATTTGCGCCAATACTGACATAGTACTTAAGCATTTTGAATTTCTACTGTGAAAAAGCCATATGTCT

17,300 17,310 17,320 17,330 17,340 17,350 17,360 17,370 17,380 17,390 17,400 17,410 17,420

Consensus  
Translation

Identity

Choloepus\_didactylus\_NC  
Translation

TGATGAAACTATAATTAATTTCAATTTCTTTTTTTTT--CATTTTAAACACGTGCTATCAACACGCCAATGATACAACGCGGCCCCACACACAAGTTAATGTCGCTTAAACACAAAGCAAGGCACGAAA

control region D-loop

Myiodon\_darwinii\_Delsuc  
Translation

Myiodon\_darwinii\_Slater  
Translation

TGATGAAACTATAATTAATTTCAATTTCTTTTTTTTTTNCATTTTAAACACGTGCTATCAACACGCCAATGATACAAC-----CAGCCTCGATGG

17,430 17,444  
Consensus  
Translation

A Y S C Y Y A G A T G A G T A C A T C A

Identity

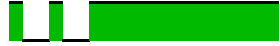

Choloepus\_didactylus\_NC

A T G C T T A G A T G A G T A C A T C A

Translation

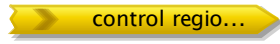

Myiodon\_darwinii\_Delsuc

Translation

Myiodon\_darwinii\_Slater

A C C C C A

Translation

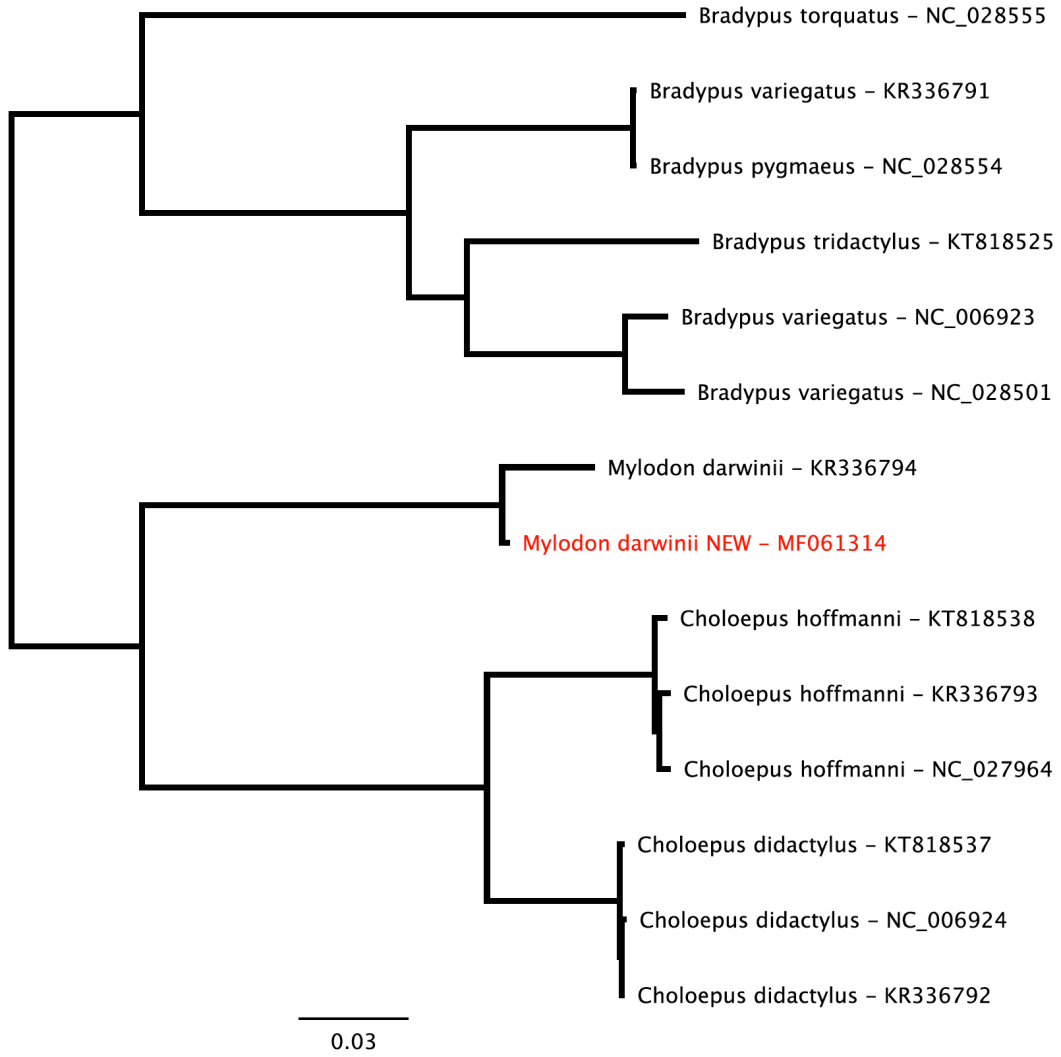

**Figure S12:** Maximum likelihood tree of available sloth mitogenomes obtained with RAxML under a single GTR+G model. Our new Mylodon mitogenome sequence is indicated in red to illustrate its much shorter branch length relative to the one previously obtained by Slater et al. (2017). Branch lengths represent mean number of substitutions per site.
